# Supplementary material for: L-HetNetAligner: A novel algorithm for Local Alignment of Heterogeneous Biological Networks
Source: PubMed Central journal article supplement (PMC7054427; doi:10.1038/s41598-020-60737-5), 2020-03-03
Supplement: 41598_2020_60737_MOESM1_ESM.pdf [file 41598_2020_60737_MOESM1_ESM.pdf]

# L-HetNetAligner: A novel algorithm for Local Alignment of Heterogeneous Biological Networks.

Marianna Milano<sup>1</sup>, Tijana Milenković<sup>2</sup>, Mario Cannataro<sup>1,3</sup>, and Pietro Hiram Guzzi<sup>1,3,\*</sup>

<sup>1</sup>University of Catanzaro, Department of Surgical and Medical Sciences, Catanzaro, 88040, Italy

<sup>2</sup>University of Notre Dame, Department of Computer Science and Engineering, Notre Dame, Indiana

<sup>3</sup>Data Analytics Research Center, University of Catanzaro

\*Corresponding Author: hguzzi@unicz.it

## ABSTRACT

Supplementary File 1.

## Appendix 1

### List of Figures

### List of Tables

|    |                                                                                                                                                                                                                                                                                                                                                                                                                                                                    |    |
|----|--------------------------------------------------------------------------------------------------------------------------------------------------------------------------------------------------------------------------------------------------------------------------------------------------------------------------------------------------------------------------------------------------------------------------------------------------------------------|----|
| 1  | Table shows the NCV-GS <sup>3</sup> scores obtained by aligning the first synthetic network with its noisy versions (Altered Networks). All synthetic networks are considered. The table shows significant improvements in the values of NCV-GS <sup>3</sup> and hence in the quality of the alignments when considering networks with many colours with respect to the network with a single colour. The improvement is also stable for all the networks. . . . . | 6  |
| 2  | Table shows the GS <sup>3</sup> scores obtained by aligning the first synthetic network with its noisy versions (Altered Networks). All the results are equal to 1, therefore the table shows that the introduction of colors does not cause a worsening of the results. . . . .                                                                                                                                                                                   | 7  |
| 3  | Table shows the NCV scores obtained by aligning the first synthetic network with its noisy versions (Altered Networks). All synthetic networks are considered. The table shows significant improvements in the values of NCV and hence in the quality of the alignments when considering networks with many colours with respect to the network with a single colour. The improvement is also stable for all the networks. . . . .                                 | 8  |
| 4  | Table shows the P-NC scores obtained by aligning the first synthetic network with its noisy versions (Altered Networks). Table shows that the alignment quality is constant when adding colors to the networks. . . . .                                                                                                                                                                                                                                            | 9  |
| 5  | Table shows the R-NC scores obtained by aligning the first synthetic network with its noisy versions (Altered Networks). All synthetic networks are considered. The table shows significant improvements in the values of R-NC and hence in the quality of the alignments when considering networks with many colours with respect to the network with a single colour. The improvement is also stable for all the networks. . . . .                               | 10 |
| 6  | Table shows the F-NC scores obtained by aligning the first synthetic network with its noisy versions (Altered Networks). All synthetic networks are considered. The table shows significant improvements in the values of F-NC and hence in the quality of the alignments when considering networks with many colours with respect to the network with a single colour. The improvement is also stable for all the networks. . . . .                               | 11 |
| 7  | NCV-GS <sup>3</sup> scores obtained by aligning the original Hetionet network with its noisy versions. Table shows a remarkable trend of improvement when considering networks with many colours. Results are similar for all the networks. . . . .                                                                                                                                                                                                                | 12 |
| 8  | Table shows the GS <sup>3</sup> scores obtained by aligning the original Hetionet network with its noisy versions. Table shows that the alignment quality is constant when considering colours. . . . .                                                                                                                                                                                                                                                            | 12 |
| 9  | Table shows the NCV scores obtained by aligning the original Hetionet network with its noisy versions. Table shows a remarkable trend of improvement when considering networks with many colours for all the networks. . . . .                                                                                                                                                                                                                                     | 12 |
| 10 | Table shows the P-NC scores obtained by aligning the original Hetionet network with its noisy versions. Table shows that the alignment quality is constant when considering colours. . . . .                                                                                                                                                                                                                                                                       | 12 |

|    |                                                                                                                                                                                                                                                                                                                                                                             |    |
|----|-----------------------------------------------------------------------------------------------------------------------------------------------------------------------------------------------------------------------------------------------------------------------------------------------------------------------------------------------------------------------------|----|
| 11 | Table shows the R-NC scores obtained by aligning the original Hetionet network with its noisy versions. Table shows a remarkable trend of improvement when considering networks with many colours. . . . .                                                                                                                                                                  | 12 |
| 12 | Table shows the F-NC scores obtained by aligning the original Hetionet network with its noisy versions. Table shows a remarkable trend of improvement when considering networks with many colours for all the networks. . . . .                                                                                                                                             | 12 |
| 13 | Table shows the NCV-GS <sup>3</sup> scores obtained by aligning the original synthetic network with its noisy versions (adding edges) for all the networks. Table shows a significant improvement of the quality of the alignments when considering networks with many colours. The improvement is also stable for all the networks. . . . .                                | 13 |
| 14 | Table shows GS <sup>3</sup> scores obtained by aligning the original synthetic network with its noisy versions (adding edges) for all the networks. Table shows that the alignment quality does not get worse when considering colors. . . . .                                                                                                                              | 14 |
| 15 | Table shows the NCV scores obtained by aligning the original synthetic network with its noisy versions for all the networks. The altered networks are generated by randomly adding edges. Table shows a significant improvement of the quality of the alignments when considering networks with many colours. The improvement is also stable for all the networks. . . . .  | 16 |
| 16 | P-NC scores obtained by aligning the original synthetic network with its noisy versions (adding edges) for all the networks. Table shows that the alignment quality is constant by considering networks with many colours. . . . .                                                                                                                                          | 17 |
| 17 | Table shows the R-NC scores obtained by aligning the original synthetic network with its noisy versions for all the networks. The altered networks are generated by randomly adding edges. Table shows a significant improvement of the quality of the alignments when considering networks with many colours. The improvement is also stable for all the networks. . . . . | 18 |
| 18 | Table shows the F-NC scores obtained by aligning the original synthetic network with its noisy versions for all the networks. The altered networks are generated by randomly adding edges. Table shows a significant improvement of the quality of the alignments when considering networks with many colours. The improvement is also stable for all the networks. . . . . | 19 |
| 19 | Table summarises NCV-GS <sup>3</sup> scores obtained by aligning the original Hetionet network with its noisy versions obtained by adding edges to the first one. Table shows a remarkable trend of improvement when considering networks with many colours. . . . .                                                                                                        | 20 |
| 20 | Table summarises GS <sup>3</sup> scores obtained by aligning the original Hetionet network with its noisy versions. Altered networks are obtained by adding edges randomly. Table shows that the alignment quality is constant when considering networks with many colours. . . . .                                                                                         | 20 |
| 21 | Table summarises the NCV scores obtained by aligning the original Hetionet network with its noisy versions. Altered networks presents more random edges. Table shows a remarkable trend of improvement when considering networks with many colours for all the networks. . . . .                                                                                            | 20 |
| 22 | Table summarises P-NC scores obtained by aligning the original Hetionet network with its noisy versions. Table shows that the alignment quality is constant when considering colours. . . . .                                                                                                                                                                               | 20 |
| 23 | Table summarises the R-NC scores obtained by aligning the original Hetionet network with its noisy versions when adding edges. Table shows a remarkable trend of improvement when considering networks with many colours. . . . .                                                                                                                                           | 20 |
| 24 | Table summarises the F-NC scores obtained by aligning the original Hetionet network with its noisy versions when adding edges. Table shows a remarkable trend of improvement when considering networks with many colours. . . . .                                                                                                                                           | 21 |
| 25 | The table shows the NCV-GS <sup>3</sup> scores obtained by aligning the original synthetic network with its noisy versions when adding nodes for all the networks. Table shows a significant improvement of the quality of the alignments when considering networks with many colours. The improvement is also stable for all the networks. . . . .                         | 22 |
| 26 | Table shows the GS <sup>3</sup> scores obtained by aligning the original synthetic network with its noisy versions when adding nodes for all the networks. Table shows that the alignment quality is constant. . . . .                                                                                                                                                      | 23 |
| 27 | The table shows the NCV scores obtained by aligning the original synthetic network with its noisy versions when adding nodes for all the networks. Table shows a significant improvement of the quality of the alignments when considering networks with many colours. The improvement is also stable for all the networks. . . . .                                         | 24 |
| 28 | P-NC scores obtained by aligning the original synthetic network with its noisy versions for all the networks. Networks are obtained by adding nodes. Table shows that the alignment quality is constant. . . . .                                                                                                                                                            | 25 |
| 29 | The table shows the R-NC scores obtained by aligning the original synthetic network with its noisy versions when adding nodes for all the networks. Table shows a significant improvement of the quality of the alignments when considering networks with many colours. The improvement is also stable for all the networks. . . . .                                        | 26 |

|    |                                                                                                                                                                                                                                                                                                                                                     |    |
|----|-----------------------------------------------------------------------------------------------------------------------------------------------------------------------------------------------------------------------------------------------------------------------------------------------------------------------------------------------------|----|
| 30 | The table shows the F-NC scores obtained by aligning the original synthetic network with its noisy versions when adding nodes for all the networks. Table shows a significant improvement of the quality of the alignments when considering networks with many colours. The improvement is also stable for all the networks. . . . .                | 27 |
| 31 | Table summarises the NCV-GS <sup>3</sup> scores obtained by aligning the original Hetionet network with its noisy versions. Altered networks are obtained by adding nodes randomly. Table shows a remarkable trend of improvements when considering networks with many colours for all the networks. . . . .                                        | 28 |
| 32 | Table summarises the GS <sup>3</sup> scores obtained by aligning the original Hetionet network with its noisy versions when adding nodes. Table shows that the alignment quality is constant. . . . .                                                                                                                                               | 28 |
| 33 | The table shows the NCV scores obtained by aligning the original synthetic network with its noisy versions when adding nodes for all the networks. Table shows a significant improvement of the quality of the alignments when considering networks with many colours. The improvement is also stable for all the networks. . . . .                 | 29 |
| 34 | Table shows the P-NC scores obtained by aligning the original Hetionet network with its noisy versions. Altered networks presents more nodes. Table shows that the alignment quality is constant. . . . .                                                                                                                                           | 29 |
| 35 | The table shows the R-N scores obtained by aligning the original synthetic network with its noisy versions when adding nodes for all the networks. Table shows a significant improvement of the quality of the alignments when considering networks with many colours. The improvement is also stable for all the networks. . . . .                 | 30 |
| 36 | The table shows the F-NC scores obtained by aligning the original synthetic network with its noisy versions when adding nodes for all the networks. Table shows a significant improvement of the quality of the alignments when considering networks with many colours. The improvement is also stable for all the networks. . . . .                | 30 |
| 37 | Table summarises the NCV-GS <sup>3</sup> scores obtained by aligning the original synthetic network with its noisy versions obtained by removing nodes. Table shows a significant improvement of the quality of the alignments when considering networks with many colours. The improvement is also stable for all the considered networks. . . . . | 32 |
| 38 | Table shows GS <sup>3</sup> scores obtained by aligning the original synthetic network with its noisy versions for all the networks. Table shows that the alignment quality is constant. . . . .                                                                                                                                                    | 33 |
| 39 | Table summarises the NCV scores obtained by aligning the original synthetic network with its noisy versions obtained by removing nodes. Table shows a significant improvement of the quality of the alignments when considering networks with many colours. The improvement is also stable for all the considered networks. . . . .                 | 35 |
| 40 | P-NC scores obtained by aligning the original synthetic network with its noisy versions for all the networks. Table shows that the alignment quality is constant. . . . .                                                                                                                                                                           | 36 |
| 41 | Table summarises the R-NC scores obtained by aligning the original synthetic network with its noisy versions obtained by removing nodes. Table shows a significant improvement of the quality of the alignments when considering networks with many colours. The improvement is also stable for all the considered networks. . . . .                | 37 |
| 42 | Table summarises the F-NC scores obtained by aligning the original synthetic network with its noisy versions obtained by removing nodes. Table shows a significant improvement of the quality of the alignments when considering networks with many colours. The improvement is also stable for all the considered networks. . . . .                | 38 |
| 43 | NCV-GS <sup>3</sup> scores obtained by aligning the original Hetionet network with its noisy versions (removing nodes). Table shows a remarkable trend of improvements when considering networks with many colours for all the networks. . . . .                                                                                                    | 39 |
| 44 | GS <sup>3</sup> scores obtained by aligning the original Hetionet network with its noisy versions (removing nodes). Table shows that the alignment quality is constant when considering networks with many colours. . . . .                                                                                                                         | 39 |
| 45 | Table shows the NCV scores obtained by aligning the original Hetionet network with its noisy versions when removing nodes. Table shows a remarkable trend of improvement when considering networks with many colours for all the networks. . . . .                                                                                                  | 39 |
| 46 | Table shows the P-NC scores obtained by aligning the original Hetionet network with its noisy versions (when removing nodes). Table shows that the alignment quality is constant by considering both un-coloured and more colours networks. . . . .                                                                                                 | 39 |
| 47 | Table shows the R-NC scores obtained by aligning the original Hetionet network with its noisy versions when removing nodes. Table shows a remarkable trend of improvements when considering networks with many colours for all the networks. . . . .                                                                                                | 39 |
| 48 | Table shows the F-NC scores obtained by aligning the original Hetionet network with its noisy versions when removing nodes. Table shows a remarkable trend of improvements when considering networks with many colours for all the networks. . . . .                                                                                                | 40 |
| 49 | Table shows the NCV-GS <sup>3</sup> scores obtained by aligning the original synthetic network with its noisy versions when removing edges for all the network models having a single colour. . . . .                                                                                                                                               | 40 |

|    |                                                                                                                                                                                                                                         |    |
|----|-----------------------------------------------------------------------------------------------------------------------------------------------------------------------------------------------------------------------------------------|----|
| 50 | Table shows the NCV-GS <sup>3</sup> scores obtained by aligning the original synthetic network with its noisy versions. Table presents two colored networks for all the network models. . . . .                                         | 41 |
| 51 | Table shows the NCV-GS <sup>3</sup> scores obtained by aligning the original synthetic network with three colors with its noisy versions when removing edges for all the network models. . . . .                                        | 41 |
| 52 | Table summarises the NCV-GS <sup>3</sup> scores obtained by aligning the original synthetic network with four colours with its noisy versions when removing edges for all the network models. . . . .                                   | 42 |
| 53 | Table shows the F-NC scores obtained by aligning the original synthetic network with one color with four colours with its noisy versions when removing edges for all the network models. . . . .                                        | 42 |
| 54 | Table shows the F-NC scores obtained by aligning the original synthetic network with two colors and its noisy versions for all the network models. . . . .                                                                              | 43 |
| 55 | Table shows F-NC scores obtained by aligning the original synthetic network with three colours and its noisy versions when removing edges for all the network models. . . . .                                                           | 44 |
| 56 | Table shows the F-NC scores obtained by aligning the original synthetic network with four colours and its noisy versions when removing edges for all the network models. . . . .                                                        | 45 |
| 57 | NCV-GS <sup>3</sup> scores obtained by aligning the original network with its noisy versions (edges removing). Table shows a remarkable trend of improvements when considering networks with many colours for all the networks. . . . . | 46 |
| 58 | F-NC scores obtained by aligning the original network with its noisy versions (edges removing). Table shows a remarkable trend of improvements when considering networks with many colours for all the networks. . . . .                | 47 |
| 59 | NCV-GS <sup>3</sup> and F-NC scores obtained by aligning the synthetic network with its noisy versions and the four subnetworks with their noisy versions. . . . .                                                                      | 48 |
| 60 | NCV-GS <sup>3</sup> and F-NC scores obtained by aligning the Hetionet network with its noisy versions and the four subnetworks with their noisy versions . . . . .                                                                      | 49 |
| 61 | Corrected predicted links obtained by aligning the original synthetic network and four subnetworks with its noisy versions for all the networks. . . . .                                                                                | 50 |
| 62 | Corrected predicted links obtained by aligning the original Hetionet network and four subnetworks with its noisy versions for all the networks. . . . .                                                                                 | 50 |
| 63 | NCV-GS <sup>3</sup> scores obtained by aligning the original synthetic network with its noisy versions for all the networks. In the alignment graph building all pair of nodes were selected. . . . .                                   | 51 |
| 64 | F-NC scores obtained by aligning the original synthetic network with its noisy versions for all the networks. In the alignment graph building all pair of nodes were selected. . . . .                                                  | 52 |
| 65 | F-NC scores obtained by aligning the original synthetic network with its noisy versions for all the networks. In the alignment graph building all pair of nodes were selected. . . . .                                                  | 53 |
| 66 | F-NC scores obtained by aligning the original synthetic network with its noisy versions for all the networks. In the alignment graph building all pair of nodes were selected. . . . .                                                  | 54 |

### **Quality of the alignments for synthetic networks**

Tables 1, 2, 3, 4, 5, and 6 report the NCV-GS<sup>3</sup>, GS<sup>3</sup>, NCV, P-NC, R-NC, F-NC measures computed on each module for the four versions of synthetic heterogeneous networks.

### **Quality of the alignments for the Hetionet Network**

Table 7, Table 8, Table 9, Table 10, Table 11, Table 12 report the NCV-GS<sup>3</sup>, GS<sup>3</sup>, NCV, P-NC, R-NC, F-NC measures computed on each module for the four versions of the Hetionet network.

### **Quality of the Alignments for synthetic heterogeneous networks with noise.**

Table 13, Table 14, Table 15, Table 16, Table 17, Table 18 report the NCV-GS<sup>3</sup>, GS<sup>3</sup>, NCV, P-NC, R-NC, F-NC measures computed on each module for the four versions of synthetic heterogeneous networks obtained by aligning each network with its noisy versions built by adding a percentage of edges.

Table 19, Table 20, Table 21, Table 22, Table 23, Table 24 report the NCV-GS<sup>3</sup>, GS<sup>3</sup>, NCV, P-NC, R-NC, F-NC measures computed on each module for the four versions of the Hetionet network obtained by aligning each network with its noisy version built by adding a percentage of edges.

**Table 1.** Table shows the NCV-GS<sup>3</sup> scores obtained by aligning the first synthetic network with its noisy versions (Altered Networks). All synthetic networks are considered. The table shows significant improvements in the values of NCV-GS<sup>3</sup> and hence in the quality of the alignments when considering networks with many colours with respect to the network with a single colour. The improvement is also stable for all the networks.

| Network | Altered Net-works | Net-works | NCV-GS <sup>3</sup> on 1 coloured version | NCV-GS <sup>3</sup> on 2 coloured version | NCV-GS <sup>3</sup> on 3 coloured version | NCV-GS <sup>3</sup> on 4 coloured version |
|---------|-------------------|-----------|-------------------------------------------|-------------------------------------------|-------------------------------------------|-------------------------------------------|
| N1      | 0                 |           | 0.535                                     | 0.811                                     | 0.889                                     | 0.99                                      |
|         | 5                 |           | 0.533                                     | 0.799                                     | 0.878                                     | 0.989                                     |
|         | 10                |           | 0.531                                     | 0.792                                     | 0.874                                     | 0.983                                     |
|         | 15                |           | 0.523                                     | 0.766                                     | 0.872                                     | 0.978                                     |
|         | 20                |           | 0.52                                      | 0.763                                     | 0.85                                      | 0.96                                      |
|         | 25                |           | 0.514                                     | 0.759                                     | 0.832                                     | 0.957                                     |
| N2      | 0                 |           | 0.529                                     | 0.81                                      | 0.883                                     | 0.997                                     |
|         | 5                 |           | 0.528                                     | 0.809                                     | 0.883                                     | 0.988                                     |
|         | 10                |           | 0.524                                     | 0.802                                     | 0.883                                     | 0.986                                     |
|         | 15                |           | 0.521                                     | 0.8                                       | 0.871                                     | 0.979                                     |
|         | 20                |           | 0.516                                     | 0.785                                     | 0.865                                     | 0.976                                     |
|         | 25                |           | 0.514                                     | 0.773                                     | 0.843                                     | 0.953                                     |
| N3      | 0                 |           | 0.535                                     | 0.811                                     | 0.863                                     | 0.983                                     |
|         | 5                 |           | 0.533                                     | 0.799                                     | 0.848                                     | 0.99                                      |
|         | 10                |           | 0.531                                     | 0.766                                     | 0.843                                     | 0.989                                     |
|         | 15                |           | 0.523                                     | 0.763                                     | 0.833                                     | 0.978                                     |
|         | 20                |           | 0.52                                      | 0.759                                     | 0.832                                     | 0.96                                      |
|         | 25                |           | 0.514                                     | 0.752                                     | 0.83                                      | 0.957                                     |
| N4      | 0                 |           | 0.532                                     | 0.797                                     | 0.863                                     | 0.971                                     |
|         | 5                 |           | 0.53                                      | 0.797                                     | 0.862                                     | 0.967                                     |
|         | 10                |           | 0.525                                     | 0.783                                     | 0.857                                     | 0.963                                     |
|         | 15                |           | 0.521                                     | 0.782                                     | 0.856                                     | 0.96                                      |
|         | 20                |           | 0.517                                     | 0.782                                     | 0.833                                     | 0.952                                     |
|         | 25                |           | 0.514                                     | 0.775                                     | 0.83                                      | 0.952                                     |
| N5      | 0                 |           | 0.533                                     | 0.797                                     | 0.878                                     | 0.993                                     |
|         | 5                 |           | 0.53                                      | 0.789                                     | 0.868                                     | 0.987                                     |
|         | 10                |           | 0.53                                      | 0.777                                     | 0.867                                     | 0.986                                     |
|         | 15                |           | 0.526                                     | 0.775                                     | 0.864                                     | 0.982                                     |
|         | 20                |           | 0.519                                     | 0.773                                     | 0.851                                     | 0.981                                     |
|         | 25                |           | 0.518                                     | 0.758                                     | 0.838                                     | 0.958                                     |
| N6      | 0                 |           | 0.533                                     | 0.806                                     | 0.868                                     | 0.992                                     |
|         | 5                 |           | 0.525                                     | 0.805                                     | 0.862                                     | 0.988                                     |
|         | 10                |           | 0.521                                     | 0.782                                     | 0.857                                     | 0.977                                     |
|         | 15                |           | 0.519                                     | 0.781                                     | 0.852                                     | 0.975                                     |
|         | 20                |           | 0.516                                     | 0.77                                      | 0.849                                     | 0.966                                     |
|         | 25                |           | 0.514                                     | 0.765                                     | 0.832                                     | 0.952                                     |
| N7      | 0                 |           | 0.534                                     | 0.811                                     | 0.884                                     | 0.992                                     |
|         | 5                 |           | 0.531                                     | 0.807                                     | 0.865                                     | 0.982                                     |
|         | 10                |           | 0.526                                     | 0.792                                     | 0.864                                     | 0.981                                     |
|         | 15                |           | 0.521                                     | 0.761                                     | 0.856                                     | 0.978                                     |
|         | 20                |           | 0.518                                     | 0.76                                      | 0.851                                     | 0.968                                     |
|         | 25                |           | 0.516                                     | 0.755                                     | 0.844                                     | 0.959                                     |
| N8      | 0                 |           | 0.53                                      | 0.792                                     | 0.886                                     | 0.998                                     |
|         | 5                 |           | 0.525                                     | 0.787                                     | 0.876                                     | 0.988                                     |
|         | 10                |           | 0.524                                     | 0.772                                     | 0.866                                     | 0.981                                     |
|         | 15                |           | 0.523                                     | 0.772                                     | 0.853                                     | 0.977                                     |
|         | 20                |           | 0.522                                     | 0.766                                     | 0.84                                      | 0.974                                     |
|         | 25                |           | 0.514                                     | 0.76                                      | 0.838                                     | 0.972                                     |
| N9      | 0                 |           | 0.529                                     | 0.795                                     | 0.868                                     | 0.998                                     |
|         | 5                 |           | 0.528                                     | 0.784                                     | 0.866                                     | 0.991                                     |
|         | 10                |           | 0.526                                     | 0.772                                     | 0.861                                     | 0.973                                     |
|         | 15                |           | 0.524                                     | 0.761                                     | 0.857                                     | 0.969                                     |
|         | 20                |           | 0.519                                     | 0.758                                     | 0.853                                     | 0.968                                     |
|         | 25                |           | 0.516                                     | 0.754                                     | 0.838                                     | 0.956                                     |
| N10     | 0                 |           | 0.533                                     | 0.81                                      | 0.869                                     | 1                                         |
|         | 5                 |           | 0.529                                     | 0.808                                     | 0.868                                     | 0.976                                     |
|         | 10                |           | 0.528                                     | 0.808                                     | 0.865                                     | 0.961                                     |
|         | 15                |           | 0.528                                     | 0.771                                     | 0.861                                     | 0.959                                     |
|         | 20                |           | 0.522                                     | 0.767                                     | 0.852                                     | 0.954                                     |
|         | 25                |           | 0.515                                     | 0.757                                     | 0.85                                      | 0.953                                     |
| N11     | 0                 |           | 0.533                                     | 0.81                                      | 0.882                                     | 1                                         |
|         | 5                 |           | 0.531                                     | 0.809                                     | 0.881                                     | 0.996                                     |
|         | 10                |           | 0.527                                     | 0.797                                     | 0.879                                     | 0.986                                     |
|         | 15                |           | 0.525                                     | 0.793                                     | 0.871                                     | 0.982                                     |
|         | 20                |           | 0.521                                     | 0.775                                     | 0.868                                     | 0.98                                      |
|         | 25                |           | 0.518                                     | 0.773                                     | 0.848                                     | 0.963                                     |
| N12     | 0                 |           | 0.527                                     | 0.809                                     | 0.887                                     | 0.99                                      |
|         | 5                 |           | 0.523                                     | 0.787                                     | 0.885                                     | 0.977                                     |
|         | 10                |           | 0.518                                     | 0.786                                     | 0.884                                     | 0.969                                     |
|         | 15                |           | 0.516                                     | 0.78                                      | 0.859                                     | 0.969                                     |
|         | 20                |           | 0.513                                     | 0.768                                     | 0.842                                     | 0.966                                     |
|         | 25                |           | 0.513                                     | 0.756                                     | 0.837                                     | 0.959                                     |

**Table 2.** Table shows the  $GS^3$  scores obtained by aligning the first synthetic network with its noisy versions (Altered Networks). All the results are equal to 1, therefore the table shows that the introduction of colors does not cause a worsening of the results.

| Network | Altered works | Net- | $GS^3$ on 1 coloured version | $GS^3$ on 2 coloured version | $GS^3$ on 3 coloured version | $GS^3$ on 4 coloured version |
|---------|---------------|------|------------------------------|------------------------------|------------------------------|------------------------------|
| N1      | 0             |      | 1                            | 1                            | 1                            | 1                            |
|         | 5             |      | 1                            | 1                            | 1                            | 1                            |
|         | 10            |      | 1                            | 1                            | 1                            | 1                            |
|         | 15            |      | 1                            | 1                            | 1                            | 1                            |
|         | 20            |      | 1                            | 1                            | 1                            | 1                            |
|         | 25            |      | 1                            | 1                            | 1                            | 1                            |
| N2      | 0             |      | 1                            | 1                            | 1                            | 1                            |
|         | 5             |      | 1                            | 1                            | 1                            | 1                            |
|         | 10            |      | 1                            | 1                            | 1                            | 1                            |
|         | 15            |      | 1                            | 1                            | 1                            | 1                            |
|         | 20            |      | 1                            | 1                            | 1                            | 1                            |
|         | 25            |      | 1                            | 1                            | 1                            | 1                            |
| N3      | 0             |      | 1                            | 1                            | 1                            | 1                            |
|         | 5             |      | 1                            | 1                            | 1                            | 1                            |
|         | 10            |      | 1                            | 1                            | 1                            | 1                            |
|         | 15            |      | 1                            | 1                            | 1                            | 1                            |
|         | 20            |      | 1                            | 1                            | 1                            | 1                            |
|         | 25            |      | 1                            | 1                            | 1                            | 1                            |
| N4      | 0             |      | 1                            | 1                            | 1                            | 1                            |
|         | 5             |      | 1                            | 1                            | 1                            | 1                            |
|         | 10            |      | 1                            | 1                            | 1                            | 1                            |
|         | 15            |      | 1                            | 1                            | 1                            | 1                            |
|         | 20            |      | 1                            | 1                            | 1                            | 1                            |
|         | 25            |      | 1                            | 1                            | 1                            | 1                            |
| N5      | 0             |      | 1                            | 1                            | 1                            | 1                            |
|         | 5             |      | 1                            | 1                            | 1                            | 1                            |
|         | 10            |      | 1                            | 1                            | 1                            | 1                            |
|         | 15            |      | 1                            | 1                            | 1                            | 1                            |
|         | 20            |      | 1                            | 1                            | 1                            | 1                            |
|         | 25            |      | 1                            | 1                            | 1                            | 1                            |
| N6      | 0             |      | 1                            | 1                            | 1                            | 1                            |
|         | 5             |      | 1                            | 1                            | 1                            | 1                            |
|         | 10            |      | 1                            | 1                            | 1                            | 1                            |
|         | 15            |      | 1                            | 1                            | 1                            | 1                            |
|         | 20            |      | 1                            | 1                            | 1                            | 1                            |
|         | 25            |      | 1                            | 1                            | 1                            | 1                            |
| N7      | 0             |      | 1                            | 1                            | 1                            | 1                            |
|         | 5             |      | 1                            | 1                            | 1                            | 1                            |
|         | 10            |      | 1                            | 1                            | 1                            | 1                            |
|         | 15            |      | 1                            | 1                            | 1                            | 1                            |
|         | 20            |      | 1                            | 1                            | 1                            | 1                            |
|         | 25            |      | 1                            | 1                            | 1                            | 1                            |
| N8      | 0             |      | 1                            | 1                            | 1                            | 1                            |
|         | 5             |      | 1                            | 1                            | 1                            | 1                            |
|         | 10            |      | 1                            | 1                            | 1                            | 1                            |
|         | 15            |      | 1                            | 1                            | 1                            | 1                            |
|         | 20            |      | 1                            | 1                            | 1                            | 1                            |
|         | 25            |      | 1                            | 1                            | 1                            | 1                            |
| N9      | 0             |      | 1                            | 1                            | 1                            | 1                            |
|         | 5             |      | 1                            | 1                            | 1                            | 1                            |
|         | 10            |      | 1                            | 1                            | 1                            | 1                            |
|         | 15            |      | 1                            | 1                            | 1                            | 1                            |
|         | 20            |      | 1                            | 1                            | 1                            | 1                            |
|         | 25            |      | 1                            | 1                            | 1                            | 1                            |
| N10     | 0             |      | 1                            | 1                            | 1                            | 1                            |
|         | 5             |      | 1                            | 1                            | 1                            | 1                            |
|         | 10            |      | 1                            | 1                            | 1                            | 1                            |
|         | 15            |      | 1                            | 1                            | 1                            | 1                            |
|         | 20            |      | 1                            | 1                            | 1                            | 1                            |
|         | 25            |      | 1                            | 1                            | 1                            | 1                            |
| N11     | 0             |      | 1                            | 1                            | 1                            | 1                            |
|         | 5             |      | 1                            | 1                            | 1                            | 1                            |
|         | 10            |      | 1                            | 1                            | 1                            | 1                            |
|         | 15            |      | 1                            | 1                            | 1                            | 1                            |
|         | 20            |      | 1                            | 1                            | 1                            | 1                            |
|         | 25            |      | 1                            | 1                            | 1                            | 1                            |
| N12     | 0             |      | 1                            | 1                            | 1                            | 1                            |
|         | 5             |      | 1                            | 1                            | 1                            | 1                            |
|         | 10            |      | 1                            | 1                            | 1                            | 1                            |
|         | 15            |      | 1                            | 1                            | 1                            | 1                            |
|         | 20            |      | 1                            | 1                            | 1                            | 1                            |
|         | 25            |      | 1                            | 1                            | 1                            | 1                            |

**Table 3.** Table shows the NCV scores obtained by aligning the first synthetic network with its noisy versions (Altered Networks). All synthetic networks are considered. The table shows significant improvements in the values of NCV and hence in the quality of the alignments when considering networks with many colours with respect to the network with a single colour. The improvement is also stable for all the networks.

| Network | Altered Networks | NCV on 1 coloured version | NCV on 2 coloured version | NCV on 3 coloured version | NCV on 4 coloured version |
|---------|------------------|---------------------------|---------------------------|---------------------------|---------------------------|
| N1      | 0                | 0.286                     | 0.658                     | 0.790                     | 0.980                     |
|         | 5                | 0.284                     | 0.638                     | 0.771                     | 0.978                     |
|         | 10               | 0.282                     | 0.627                     | 0.764                     | 0.966                     |
|         | 15               | 0.274                     | 0.587                     | 0.760                     | 0.956                     |
|         | 20               | 0.270                     | 0.582                     | 0.723                     | 0.922                     |
|         | 25               | 0.264                     | 0.576                     | 0.692                     | 0.916                     |
| N2      | 0                | 0.280                     | 0.656                     | 0.780                     | 0.994                     |
|         | 5                | 0.279                     | 0.654                     | 0.780                     | 0.976                     |
|         | 10               | 0.275                     | 0.643                     | 0.780                     | 0.972                     |
|         | 15               | 0.271                     | 0.640                     | 0.759                     | 0.958                     |
|         | 20               | 0.266                     | 0.616                     | 0.748                     | 0.953                     |
|         | 25               | 0.264                     | 0.598                     | 0.711                     | 0.908                     |
| N3      | 0                | 0.286                     | 0.658                     | 0.745                     | 0.966                     |
|         | 5                | 0.284                     | 0.638                     | 0.719                     | 0.980                     |
|         | 10               | 0.282                     | 0.587                     | 0.711                     | 0.978                     |
|         | 15               | 0.274                     | 0.582                     | 0.694                     | 0.956                     |
|         | 20               | 0.270                     | 0.576                     | 0.692                     | 0.922                     |
|         | 25               | 0.264                     | 0.566                     | 0.689                     | 0.916                     |
| N4      | 0                | 0.283                     | 0.635                     | 0.745                     | 0.943                     |
|         | 5                | 0.281                     | 0.635                     | 0.743                     | 0.935                     |
|         | 10               | 0.276                     | 0.613                     | 0.734                     | 0.927                     |
|         | 15               | 0.271                     | 0.612                     | 0.733                     | 0.922                     |
|         | 20               | 0.267                     | 0.612                     | 0.694                     | 0.906                     |
|         | 25               | 0.264                     | 0.601                     | 0.689                     | 0.906                     |
| N5      | 0                | 0.284                     | 0.635                     | 0.771                     | 0.986                     |
|         | 5                | 0.281                     | 0.623                     | 0.753                     | 0.974                     |
|         | 10               | 0.281                     | 0.604                     | 0.752                     | 0.972                     |
|         | 15               | 0.277                     | 0.601                     | 0.746                     | 0.964                     |
|         | 20               | 0.269                     | 0.598                     | 0.724                     | 0.962                     |
|         | 25               | 0.268                     | 0.575                     | 0.702                     | 0.918                     |
| N6      | 0                | 0.284                     | 0.650                     | 0.753                     | 0.984                     |
|         | 5                | 0.276                     | 0.648                     | 0.743                     | 0.976                     |
|         | 10               | 0.271                     | 0.612                     | 0.734                     | 0.955                     |
|         | 15               | 0.269                     | 0.610                     | 0.726                     | 0.951                     |
|         | 20               | 0.266                     | 0.593                     | 0.721                     | 0.933                     |
|         | 25               | 0.264                     | 0.585                     | 0.692                     | 0.906                     |
| N7      | 0                | 0.285                     | 0.658                     | 0.781                     | 0.984                     |
|         | 5                | 0.282                     | 0.651                     | 0.748                     | 0.964                     |
|         | 10               | 0.277                     | 0.627                     | 0.746                     | 0.962                     |
|         | 15               | 0.271                     | 0.579                     | 0.733                     | 0.956                     |
|         | 20               | 0.268                     | 0.578                     | 0.724                     | 0.937                     |
|         | 25               | 0.266                     | 0.570                     | 0.712                     | 0.920                     |
| N8      | 0                | 0.281                     | 0.627                     | 0.785                     | 0.996                     |
|         | 5                | 0.276                     | 0.619                     | 0.767                     | 0.976                     |
|         | 10               | 0.275                     | 0.596                     | 0.750                     | 0.962                     |
|         | 15               | 0.274                     | 0.596                     | 0.728                     | 0.955                     |
|         | 20               | 0.272                     | 0.587                     | 0.706                     | 0.949                     |
|         | 25               | 0.264                     | 0.578                     | 0.702                     | 0.945                     |
| N9      | 0                | 0.280                     | 0.632                     | 0.753                     | 0.996                     |
|         | 5                | 0.279                     | 0.615                     | 0.750                     | 0.982                     |
|         | 10               | 0.277                     | 0.596                     | 0.741                     | 0.947                     |
|         | 15               | 0.275                     | 0.579                     | 0.734                     | 0.939                     |
|         | 20               | 0.269                     | 0.575                     | 0.728                     | 0.937                     |
|         | 25               | 0.266                     | 0.569                     | 0.702                     | 0.914                     |
| N10     | 0                | 0.284                     | 0.656                     | 0.755                     | 1                         |
|         | 5                | 0.280                     | 0.653                     | 0.753                     | 0.953                     |
|         | 10               | 0.279                     | 0.653                     | 0.748                     | 0.924                     |
|         | 15               | 0.279                     | 0.594                     | 0.741                     | 0.920                     |
|         | 20               | 0.272                     | 0.588                     | 0.726                     | 0.910                     |
|         | 25               | 0.265                     | 0.573                     | 0.723                     | 0.908                     |
| N11     | 0                | 0.284                     | 0.656                     | 0.778                     | 1                         |
|         | 5                | 0.282                     | 0.654                     | 0.776                     | 0.992                     |
|         | 10               | 0.278                     | 0.635                     | 0.773                     | 0.972                     |
|         | 15               | 0.276                     | 0.629                     | 0.759                     | 0.964                     |
|         | 20               | 0.271                     | 0.601                     | 0.753                     | 0.960                     |
|         | 25               | 0.268                     | 0.598                     | 0.719                     | 0.927                     |
| N12     | 0                | 0.278                     | 0.654                     | 0.787                     | 0.980                     |
|         | 5                | 0.274                     | 0.619                     | 0.783                     | 0.955                     |
|         | 10               | 0.268                     | 0.618                     | 0.781                     | 0.939                     |
|         | 15               | 0.266                     | 0.608                     | 0.738                     | 0.939                     |
|         | 20               | 0.263                     | 0.590                     | 0.709                     | 0.933                     |
|         | 25               | 0.263                     | 0.572                     | 0.701                     | 0.920                     |



**Table 4.** Table shows the P-NC scores obtained by aligning the first synthetic network with its noisy versions (Altered Networks). Table shows that the alignment quality is constant when adding colors to the networks.

| Network | Altered works | Net- | P-NC on 1 coloured version | P-NC on 2 coloured version | P-NC on 3 coloured version | P-NC on 4 coloured version |
|---------|---------------|------|----------------------------|----------------------------|----------------------------|----------------------------|
| N1      | 0             |      | 1                          | 1                          | 1                          | 1                          |
|         | 5             |      | 1                          | 1                          | 1                          | 1                          |
|         | 10            |      | 1                          | 1                          | 1                          | 1                          |
|         | 15            |      | 1                          | 1                          | 1                          | 1                          |
|         | 20            |      | 1                          | 1                          | 1                          | 1                          |
|         | 25            |      | 1                          | 1                          | 1                          | 1                          |
| N2      | 0             |      | 1                          | 1                          | 1                          | 1                          |
|         | 5             |      | 1                          | 1                          | 1                          | 1                          |
|         | 10            |      | 1                          | 1                          | 1                          | 1                          |
|         | 15            |      | 1                          | 1                          | 1                          | 1                          |
|         | 20            |      | 1                          | 1                          | 1                          | 1                          |
|         | 25            |      | 1                          | 1                          | 1                          | 1                          |
| N3      | 0             |      | 1                          | 1                          | 1                          | 1                          |
|         | 5             |      | 1                          | 1                          | 1                          | 1                          |
|         | 10            |      | 1                          | 1                          | 1                          | 1                          |
|         | 15            |      | 1                          | 1                          | 1                          | 1                          |
|         | 20            |      | 1                          | 1                          | 1                          | 1                          |
|         | 25            |      | 1                          | 1                          | 1                          | 1                          |
| N4      | 0             |      | 1                          | 1                          | 1                          | 1                          |
|         | 5             |      | 1                          | 1                          | 1                          | 1                          |
|         | 10            |      | 1                          | 1                          | 1                          | 1                          |
|         | 15            |      | 1                          | 1                          | 1                          | 1                          |
|         | 20            |      | 1                          | 1                          | 1                          | 1                          |
|         | 25            |      | 1                          | 1                          | 1                          | 1                          |
| N5      | 0             |      | 1                          | 1                          | 1                          | 1                          |
|         | 5             |      | 1                          | 1                          | 1                          | 1                          |
|         | 10            |      | 1                          | 1                          | 1                          | 1                          |
|         | 15            |      | 1                          | 1                          | 1                          | 1                          |
|         | 20            |      | 1                          | 1                          | 1                          | 1                          |
|         | 25            |      | 1                          | 1                          | 1                          | 1                          |
| N6      | 0             |      | 1                          | 1                          | 1                          | 1                          |
|         | 5             |      | 1                          | 1                          | 1                          | 1                          |
|         | 10            |      | 1                          | 1                          | 1                          | 1                          |
|         | 15            |      | 1                          | 1                          | 1                          | 1                          |
|         | 20            |      | 1                          | 1                          | 1                          | 1                          |
|         | 25            |      | 1                          | 1                          | 1                          | 1                          |
| N7      | 0             |      | 1                          | 1                          | 1                          | 1                          |
|         | 5             |      | 1                          | 1                          | 1                          | 1                          |
|         | 10            |      | 1                          | 1                          | 1                          | 1                          |
|         | 15            |      | 1                          | 1                          | 1                          | 1                          |
|         | 20            |      | 1                          | 1                          | 1                          | 1                          |
|         | 25            |      | 1                          | 1                          | 1                          | 1                          |
| N8      | 0             |      | 1                          | 1                          | 1                          | 1                          |
|         | 5             |      | 1                          | 1                          | 1                          | 1                          |
|         | 10            |      | 1                          | 1                          | 1                          | 1                          |
|         | 15            |      | 1                          | 1                          | 1                          | 1                          |
|         | 20            |      | 1                          | 1                          | 1                          | 1                          |
|         | 25            |      | 1                          | 1                          | 1                          | 1                          |
| N9      | 0             |      | 1                          | 1                          | 1                          | 1                          |
|         | 5             |      | 1                          | 1                          | 1                          | 1                          |
|         | 10            |      | 1                          | 1                          | 1                          | 1                          |
|         | 15            |      | 1                          | 1                          | 1                          | 1                          |
|         | 20            |      | 1                          | 1                          | 1                          | 1                          |
|         | 25            |      | 1                          | 1                          | 1                          | 1                          |
| N10     | 0             |      | 1                          | 1                          | 1                          | 1                          |
|         | 5             |      | 1                          | 1                          | 1                          | 1                          |
|         | 10            |      | 1                          | 1                          | 1                          | 1                          |
|         | 15            |      | 1                          | 1                          | 1                          | 1                          |
|         | 20            |      | 1                          | 1                          | 1                          | 1                          |
|         | 25            |      | 1                          | 1                          | 1                          | 1                          |
| N11     | 0             |      | 1                          | 1                          | 1                          | 1                          |
|         | 5             |      | 1                          | 1                          | 1                          | 1                          |
|         | 10            |      | 1                          | 1                          | 1                          | 1                          |
|         | 15            |      | 1                          | 1                          | 1                          | 1                          |
|         | 20            |      | 1                          | 1                          | 1                          | 1                          |
|         | 25            |      | 1                          | 1                          | 1                          | 1                          |
| N12     | 0             |      | 1                          | 1                          | 1                          | 1                          |
|         | 5             |      | 1                          | 1                          | 1                          | 1                          |
|         | 10            |      | 1                          | 1                          | 1                          | 1                          |
|         | 15            |      | 1                          | 1                          | 1                          | 1                          |
|         | 20            |      | 1                          | 1                          | 1                          | 1                          |
|         | 25            |      | 1                          | 1                          | 1                          | 1                          |

**Table 5.** Table shows the R-NC scores obtained by aligning the first synthetic network with its noisy versions (Altered Networks). All synthetic networks are considered. The table shows significant improvements in the values of R-NC and hence in the quality of the alignments when considering networks with many colours with respect to the network with a single colour. The improvement is also stable for all the networks.

| Network | Altered Networks | R-NC on 1 coloured version | R-NC on 2 coloured version | R-NC on 3 coloured version | R-NC on 4 coloured version |
|---------|------------------|----------------------------|----------------------------|----------------------------|----------------------------|
| N1      | 0                | 0.173                      | 0.498                      | 0.707                      | 0.960                      |
|         | 5                | 0.172                      | 0.496                      | 0.697                      | 0.929                      |
|         | 10               | 0.171                      | 0.489                      | 0.637                      | 0.916                      |
|         | 15               | 0.169                      | 0.487                      | 0.613                      | 0.908                      |
|         | 20               | 0.163                      | 0.483                      | 0.581                      | 0.889                      |
|         | 25               | 0.158                      | 0.483                      | 0.578                      | 0.817                      |
| N2      | 0                | 0.171                      | 0.511                      | 0.707                      | 0.980                      |
|         | 5                | 0.161                      | 0.511                      | 0.697                      | 0.964                      |
|         | 10               | 0.159                      | 0.510                      | 0.621                      | 0.953                      |
|         | 15               | 0.158                      | 0.504                      | 0.615                      | 0.870                      |
|         | 20               | 0.158                      | 0.500                      | 0.582                      | 0.845                      |
|         | 25               | 0.154                      | 0.489                      | 0.579                      | 0.830                      |
| N3      | 0                | 0.166                      | 0.498                      | 0.711                      | 0.922                      |
|         | 5                | 0.166                      | 0.489                      | 0.699                      | 0.897                      |
|         | 10               | 0.163                      | 0.496                      | 0.621                      | 0.882                      |
|         | 15               | 0.162                      | 0.487                      | 0.615                      | 0.859                      |
|         | 20               | 0.156                      | 0.483                      | 0.582                      | 0.859                      |
|         | 25               | 0.156                      | 0.483                      | 0.579                      | 0.845                      |
| N4      | 0                | 0.175                      | 0.514                      | 0.694                      | 0.945                      |
|         | 5                | 0.171                      | 0.510                      | 0.687                      | 0.939                      |
|         | 10               | 0.168                      | 0.510                      | 0.681                      | 0.895                      |
|         | 15               | 0.165                      | 0.493                      | 0.661                      | 0.884                      |
|         | 20               | 0.160                      | 0.484                      | 0.646                      | 0.874                      |
|         | 25               | 0.159                      | 0.483                      | 0.594                      | 0.863                      |
| N5      | 0                | 0.175                      | 0.517                      | 0.686                      | 0.962                      |
|         | 5                | 0.171                      | 0.513                      | 0.671                      | 0.929                      |
|         | 10               | 0.169                      | 0.511                      | 0.671                      | 0.856                      |
|         | 15               | 0.165                      | 0.491                      | 0.610                      | 0.856                      |
|         | 20               | 0.162                      | 0.490                      | 0.602                      | 0.848                      |
|         | 25               | 0.154                      | 0.489                      | 0.581                      | 0.839                      |
| N6      | 0                | 0.170                      | 0.526                      | 0.704                      | 0.953                      |
|         | 5                | 0.170                      | 0.524                      | 0.691                      | 0.874                      |
|         | 10               | 0.168                      | 0.497                      | 0.669                      | 0.874                      |
|         | 15               | 0.166                      | 0.494                      | 0.663                      | 0.856                      |
|         | 20               | 0.158                      | 0.493                      | 0.616                      | 0.823                      |
|         | 25               | 0.154                      | 0.491                      | 0.601                      | 0.817                      |
| N7      | 0                | 0.175                      | 0.513                      | 0.707                      | 0.974                      |
|         | 5                | 0.170                      | 0.504                      | 0.707                      | 0.941                      |
|         | 10               | 0.169                      | 0.501                      | 0.632                      | 0.885                      |
|         | 15               | 0.162                      | 0.500                      | 0.627                      | 0.884                      |
|         | 20               | 0.154                      | 0.483                      | 0.607                      | 0.884                      |
|         | 25               | 0.154                      | 0.480                      | 0.596                      | 0.852                      |
| N8      | 0                | 0.169                      | 0.524                      | 0.689                      | 0.970                      |
|         | 5                | 0.165                      | 0.523                      | 0.664                      | 0.958                      |
|         | 10               | 0.159                      | 0.523                      | 0.642                      | 0.943                      |
|         | 15               | 0.159                      | 0.518                      | 0.638                      | 0.918                      |
|         | 20               | 0.158                      | 0.510                      | 0.596                      | 0.843                      |
|         | 25               | 0.154                      | 0.490                      | 0.587                      | 0.824                      |
| N9      | 0                | 0.172                      | 0.518                      | 0.674                      | 0.939                      |
|         | 5                | 0.166                      | 0.511                      | 0.661                      | 0.929                      |
|         | 10               | 0.165                      | 0.507                      | 0.643                      | 0.929                      |
|         | 15               | 0.158                      | 0.504                      | 0.623                      | 0.872                      |
|         | 20               | 0.158                      | 0.496                      | 0.616                      | 0.817                      |
|         | 25               | 0.154                      | 0.487                      | 0.585                      | 0.817                      |
| N10     | 0                | 0.175                      | 0.514                      | 0.701                      | 0.895                      |
|         | 5                | 0.171                      | 0.506                      | 0.696                      | 0.889                      |
|         | 10               | 0.169                      | 0.501                      | 0.666                      | 0.885                      |
|         | 15               | 0.169                      | 0.500                      | 0.666                      | 0.845                      |
|         | 20               | 0.161                      | 0.494                      | 0.638                      | 0.817                      |
|         | 25               | 0.154                      | 0.484                      | 0.626                      | 0.808                      |
| N11     | 0                | 0.167                      | 0.520                      | 0.643                      | 0.970                      |
|         | 5                | 0.162                      | 0.520                      | 0.661                      | 0.968                      |
|         | 10               | 0.158                      | 0.513                      | 0.616                      | 0.953                      |
|         | 15               | 0.155                      | 0.511                      | 0.674                      | 0.904                      |
|         | 20               | 0.154                      | 0.501                      | 0.623                      | 0.887                      |
|         | 25               | 0.152                      | 0.490                      | 0.585                      | 0.857                      |
| N12     | 0                | 0.174                      | 0.524                      | 0.702                      | 0.953                      |
|         | 5                | 0.164                      | 0.510                      | 0.694                      | 0.899                      |
|         | 10               | 0.164                      | 0.508                      | 0.692                      | 0.889                      |
|         | 15               | 0.157                      | 0.497                      | 0.686                      | 0.884                      |
|         | 20               | 0.155                      | 0.490                      | 0.666                      | 0.878                      |
|         | 25               | 0.154                      | 0.487                      | 0.578                      | 0.846                      |

**Table 6.** Table shows the F-NC scores obtained by aligning the first synthetic network with its noisy versions (Altered Networks). All synthetic networks are considered. The table shows significant improvements in the values of F-NC and hence in the quality of the alignments when considering networks with many colours with respect to the network with a single colour. The improvement is also stable for all the networks.

| Network | Altered Networks | F-NC on 1 coloured version | F-NC on 2 coloured version | F-NC on 3 coloured version | F-NC on 4 coloured version |
|---------|------------------|----------------------------|----------------------------|----------------------------|----------------------------|
| N1      | 0                | 0.416                      | 0.706                      | 0.841                      | 0.98                       |
|         | 5                | 0.415                      | 0.704                      | 0.835                      | 0.964                      |
|         | 10               | 0.413                      | 0.699                      | 0.798                      | 0.957                      |
|         | 15               | 0.411                      | 0.698                      | 0.783                      | 0.953                      |
|         | 20               | 0.404                      | 0.695                      | 0.762                      | 0.943                      |
|         | 25               | 0.397                      | 0.695                      | 0.76                       | 0.904                      |
| N2      | 0                | 0.414                      | 0.715                      | 0.841                      | 0.99                       |
|         | 5                | 0.401                      | 0.715                      | 0.835                      | 0.982                      |
|         | 10               | 0.399                      | 0.714                      | 0.788                      | 0.976                      |
|         | 15               | 0.398                      | 0.71                       | 0.784                      | 0.933                      |
|         | 20               | 0.397                      | 0.707                      | 0.763                      | 0.919                      |
|         | 25               | 0.392                      | 0.699                      | 0.761                      | 0.911                      |
| N3      | 0                | 0.408                      | 0.706                      | 0.843                      | 0.96                       |
|         | 5                | 0.407                      | 0.699                      | 0.836                      | 0.947                      |
|         | 10               | 0.404                      | 0.704                      | 0.788                      | 0.939                      |
|         | 15               | 0.403                      | 0.698                      | 0.784                      | 0.927                      |
|         | 20               | 0.395                      | 0.695                      | 0.763                      | 0.927                      |
|         | 25               | 0.395                      | 0.695                      | 0.761                      | 0.919                      |
| N4      | 0                | 0.418                      | 0.717                      | 0.833                      | 0.972                      |
|         | 5                | 0.413                      | 0.714                      | 0.829                      | 0.969                      |
|         | 10               | 0.41                       | 0.714                      | 0.825                      | 0.946                      |
|         | 15               | 0.406                      | 0.702                      | 0.813                      | 0.94                       |
|         | 20               | 0.4                        | 0.696                      | 0.804                      | 0.935                      |
|         | 25               | 0.399                      | 0.695                      | 0.771                      | 0.929                      |
| N5      | 0                | 0.418                      | 0.719                      | 0.828                      | 0.981                      |
|         | 5                | 0.414                      | 0.716                      | 0.819                      | 0.964                      |
|         | 10               | 0.411                      | 0.715                      | 0.819                      | 0.925                      |
|         | 15               | 0.406                      | 0.701                      | 0.781                      | 0.925                      |
|         | 20               | 0.402                      | 0.7                        | 0.776                      | 0.921                      |
|         | 25               | 0.393                      | 0.699                      | 0.762                      | 0.916                      |
| N6      | 0                | 0.412                      | 0.725                      | 0.839                      | 0.976                      |
|         | 5                | 0.412                      | 0.724                      | 0.831                      | 0.935                      |
|         | 10               | 0.41                       | 0.705                      | 0.818                      | 0.935                      |
|         | 15               | 0.407                      | 0.703                      | 0.814                      | 0.925                      |
|         | 20               | 0.397                      | 0.702                      | 0.785                      | 0.907                      |
|         | 25               | 0.393                      | 0.701                      | 0.775                      | 0.904                      |
| N7      | 0                | 0.418                      | 0.716                      | 0.841                      | 0.987                      |
|         | 5                | 0.412                      | 0.71                       | 0.841                      | 0.97                       |
|         | 10               | 0.411                      | 0.708                      | 0.795                      | 0.941                      |
|         | 15               | 0.402                      | 0.707                      | 0.792                      | 0.94                       |
|         | 20               | 0.393                      | 0.695                      | 0.779                      | 0.94                       |
|         | 25               | 0.392                      | 0.693                      | 0.772                      | 0.923                      |
| N8      | 0                | 0.411                      | 0.724                      | 0.83                       | 0.985                      |
|         | 5                | 0.406                      | 0.723                      | 0.815                      | 0.979                      |
|         | 10               | 0.399                      | 0.723                      | 0.801                      | 0.971                      |
|         | 15               | 0.399                      | 0.72                       | 0.799                      | 0.958                      |
|         | 20               | 0.398                      | 0.714                      | 0.772                      | 0.918                      |
|         | 25               | 0.393                      | 0.7                        | 0.766                      | 0.908                      |
| N9      | 0                | 0.415                      | 0.72                       | 0.821                      | 0.969                      |
|         | 5                | 0.407                      | 0.715                      | 0.813                      | 0.964                      |
|         | 10               | 0.406                      | 0.712                      | 0.802                      | 0.964                      |
|         | 15               | 0.398                      | 0.71                       | 0.789                      | 0.934                      |
|         | 20               | 0.398                      | 0.704                      | 0.785                      | 0.904                      |
|         | 25               | 0.393                      | 0.698                      | 0.765                      | 0.904                      |
| N10     | 0                | 0.418                      | 0.717                      | 0.837                      | 0.946                      |
|         | 5                | 0.413                      | 0.711                      | 0.834                      | 0.943                      |
|         | 10               | 0.411                      | 0.708                      | 0.816                      | 0.941                      |
|         | 15               | 0.411                      | 0.707                      | 0.816                      | 0.919                      |
|         | 20               | 0.401                      | 0.703                      | 0.799                      | 0.904                      |
|         | 25               | 0.392                      | 0.696                      | 0.791                      | 0.899                      |
| N11     | 0                | 0.409                      | 0.721                      | 0.802                      | 0.985                      |
|         | 5                | 0.403                      | 0.721                      | 0.813                      | 0.984                      |
|         | 10               | 0.397                      | 0.716                      | 0.785                      | 0.976                      |
|         | 15               | 0.394                      | 0.715                      | 0.821                      | 0.951                      |
|         | 20               | 0.393                      | 0.708                      | 0.789                      | 0.942                      |
|         | 25               | 0.39                       | 0.7                        | 0.765                      | 0.926                      |
| N12     | 0                | 0.417                      | 0.724                      | 0.838                      | 0.976                      |
|         | 5                | 0.405                      | 0.714                      | 0.833                      | 0.948                      |
|         | 10               | 0.405                      | 0.713                      | 0.832                      | 0.943                      |
|         | 15               | 0.396                      | 0.705                      | 0.828                      | 0.94                       |
|         | 20               | 0.394                      | 0.7                        | 0.816                      | 0.937                      |
|         | 25               | 0.392                      | 0.698                      | 0.76                       | 0.92                       |

**Table 7.** NCV-GS<sup>3</sup> scores obtained by aligning the original Hetionet network with its noisy versions. Table shows a remarkable trend of improvement when considering networks with many colours. Results are similar for all the networks.

| Network  | Altered Networks | NCV-GS <sup>3</sup> on 1 coloured version | NCV-GS <sup>3</sup> on 2 coloured version | NCV-GS <sup>3</sup> on 3 coloured version | NCV-GS <sup>3</sup> on 4 coloured version |
|----------|------------------|-------------------------------------------|-------------------------------------------|-------------------------------------------|-------------------------------------------|
| Hetionet | 0% of noise      | 0.536                                     | 0.813                                     | 0.887                                     | 1                                         |
|          | 5% of noise      | 0.532                                     | 0.803                                     | 0.882                                     | 0.996                                     |
|          | 10% of noise     | 0.531                                     | 0.774                                     | 0.854                                     | 0.996                                     |
|          | 15% of noise     | 0.53                                      | 0.763                                     | 0.843                                     | 0.966                                     |
|          | 20% of noise     | 0.524                                     | 0.76                                      | 0.834                                     | 0.954                                     |
|          | 25% of noise     | 0.512                                     | 0.745                                     | 0.825                                     | 0.951                                     |

**Table 8.** Table shows the GS<sup>3</sup> scores obtained by aligning the original Hetionet network with its noisy versions. Table shows that the alignment quality is constant when considering colours.

| Network  | Altered Networks | GS <sup>3</sup> on 1 coloured version | GS <sup>3</sup> on 2 coloured version | GS <sup>3</sup> on 3 coloured version | GS <sup>3</sup> on 4 coloured version |
|----------|------------------|---------------------------------------|---------------------------------------|---------------------------------------|---------------------------------------|
| Hetionet | 0% of noise      | 1                                     | 1                                     | 1                                     | 1                                     |
|          | 5% of noise      | 1                                     | 1                                     | 1                                     | 1                                     |
|          | 10% of noise     | 1                                     | 1                                     | 1                                     | 1                                     |
|          | 15% of noise     | 1                                     | 1                                     | 1                                     | 1                                     |
|          | 20% of noise     | 1                                     | 1                                     | 1                                     | 1                                     |
|          | 25% of noise     | 1                                     | 1                                     | 1                                     | 1                                     |

**Table 9.** Table shows the NCV scores obtained by aligning the original Hetionet network with its noisy versions. Table shows a remarkable trend of improvement when considering networks with many colours for all the networks.

| Network  | Altered Networks | NCV on 1 coloured version | NCV on 2 coloured version | NCV on 3 coloured version | NCV on 4 coloured version |
|----------|------------------|---------------------------|---------------------------|---------------------------|---------------------------|
| Hetionet | 0% of noise      | 0.287                     | 0.661                     | 0.787                     | 1                         |
|          | 5% of noise      | 0.283                     | 0.645                     | 0.778                     | 0.992                     |
|          | 10% of noise     | 0.282                     | 0.599                     | 0.729                     | 0.992                     |
|          | 15% of noise     | 0.281                     | 0.582                     | 0.711                     | 0.933                     |
|          | 20% of noise     | 0.275                     | 0.578                     | 0.696                     | 0.910                     |
|          | 25% of noise     | 0.262                     | 0.555                     | 0.681                     | 0.904                     |

**Table 10.** Table shows the P-NC scores obtained by aligning the original Hetionet network with its noisy versions. Table shows that the alignment quality is constant when considering colours.

| Network  | Altered Networks | P-NC on 1 coloured version | P-NC on 2 coloured version | P-NC on 3 coloured version | P-NC on 4 coloured version |
|----------|------------------|----------------------------|----------------------------|----------------------------|----------------------------|
| Hetionet | 0% of noise      | 1                          | 1                          | 1                          | 1                          |
|          | 5% of noise      | 1                          | 1                          | 1                          | 1                          |
|          | 10% of noise     | 1                          | 1                          | 1                          | 1                          |
|          | 15% of noise     | 1                          | 1                          | 1                          | 1                          |
|          | 20% of noise     | 1                          | 1                          | 1                          | 1                          |
|          | 25% of noise     | 1                          | 1                          | 1                          | 1                          |

**Table 11.** Table shows the R-NC scores obtained by aligning the original Hetionet network with its noisy versions. Table shows a remarkable trend of improvement when considering networks with many colours.

| Network  | Altered Networks | R-NC on 1 coloured version | R-NC on 2 coloured version | R-NC on 3 coloured version | R-NC on 4 coloured version |
|----------|------------------|----------------------------|----------------------------|----------------------------|----------------------------|
| Hetionet | 0% of noise      | 0.175                      | 0.523                      | 0.785                      | 0.978                      |
|          | 5% of noise      | 0.168                      | 0.518                      | 0.781                      | 0.924                      |
|          | 10% of noise     | 0.167                      | 0.517                      | 0.692                      | 0.906                      |
|          | 15% of noise     | 0.165                      | 0.510                      | 0.663                      | 0.889                      |
|          | 20% of noise     | 0.157                      | 0.496                      | 0.654                      | 0.852                      |
|          | 25% of noise     | 0.153                      | 0.480                      | 0.548                      | 0.832                      |

**Table 12.** Table shows the F-NC scores obtained by aligning the original Hetionet network with its noisy versions. Table shows a remarkable trend of improvement when considering networks with many colours for all the networks.

| Network  | Altered Networks | F-NC on 1 coloured version | F-NC on 2 coloured version | F-NC on 3 coloured version | F-NC on 4 coloured version |
|----------|------------------|----------------------------|----------------------------|----------------------------|----------------------------|
| Hetionet | 0% of noise      | 0.418                      | 0.723                      | 0.886                      | 0.989                      |
|          | 5% of noise      | 0.41                       | 0.72                       | 0.884                      | 0.961                      |
|          | 10% of noise     | 0.409                      | 0.719                      | 0.832                      | 0.952                      |
|          | 15% of noise     | 0.406                      | 0.714                      | 0.814                      | 0.943                      |
|          | 20% of noise     | 0.396                      | 0.704                      | 0.809                      | 0.923                      |
|          | 25% of noise     | 0.391                      | 0.693                      | 0.74                       | 0.912                      |

**Table 13.** Table shows the NCV-GS<sup>3</sup> scores obtained by aligning the original synthetic network with its noisy versions (adding edges) for all the networks. Table shows a significant improvement of the quality of the alignments when considering networks with many colours. The improvement is also stable for all the networks.

| Network | Altered works | Net-works | NCV-GS <sup>3</sup> on 1 coloured version | NCV-GS <sup>3</sup> on 2 coloured version | NCV-GS <sup>3</sup> on 3 coloured version | NCV-GS <sup>3</sup> on 4 coloured version |
|---------|---------------|-----------|-------------------------------------------|-------------------------------------------|-------------------------------------------|-------------------------------------------|
| N1      | 0             |           | 0.426                                     | 0.521                                     | 0.677                                     | 0.893                                     |
|         | 5             |           | 0.425                                     | 0.518                                     | 0.674                                     | 0.89                                      |
|         | 10            |           | 0.423                                     | 0.516                                     | 0.656                                     | 0.889                                     |
|         | 15            |           | 0.419                                     | 0.516                                     | 0.646                                     | 0.87                                      |
|         | 20            |           | 0.419                                     | 0.508                                     | 0.644                                     | 0.869                                     |
|         | 25            |           | 0.408                                     | 0.507                                     | 0.632                                     | 0.868                                     |
| N2      | 0             |           | 0.445                                     | 0.527                                     | 0.673                                     | 0.901                                     |
|         | 5             |           | 0.433                                     | 0.527                                     | 0.672                                     | 0.9                                       |
|         | 10            |           | 0.428                                     | 0.526                                     | 0.663                                     | 0.875                                     |
|         | 15            |           | 0.426                                     | 0.507                                     | 0.659                                     | 0.873                                     |
|         | 20            |           | 0.422                                     | 0.504                                     | 0.635                                     | 0.872                                     |
|         | 25            |           | 0.414                                     | 0.503                                     | 0.615                                     | 0.87                                      |
| N3      | 0             |           | 0.445                                     | 0.53                                      | 0.678                                     | 0.889                                     |
|         | 5             |           | 0.442                                     | 0.527                                     | 0.675                                     | 0.882                                     |
|         | 10            |           | 0.438                                     | 0.522                                     | 0.669                                     | 0.88                                      |
|         | 15            |           | 0.436                                     | 0.512                                     | 0.663                                     | 0.877                                     |
|         | 20            |           | 0.429                                     | 0.509                                     | 0.615                                     | 0.862                                     |
|         | 25            |           | 0.416                                     | 0.504                                     | 0.611                                     | 0.861                                     |
| N4      | 0             |           | 0.447                                     | 0.525                                     | 0.679                                     | 0.9                                       |
|         | 5             |           | 0.427                                     | 0.523                                     | 0.648                                     | 0.898                                     |
|         | 10            |           | 0.421                                     | 0.52                                      | 0.648                                     | 0.898                                     |
|         | 15            |           | 0.418                                     | 0.509                                     | 0.64                                      | 0.894                                     |
|         | 20            |           | 0.414                                     | 0.505                                     | 0.625                                     | 0.886                                     |
|         | 25            |           | 0.407                                     | 0.503                                     | 0.616                                     | 0.869                                     |
| N5      | 0             |           | 0.444                                     | 0.517                                     | 0.675                                     | 0.895                                     |
|         | 5             |           | 0.431                                     | 0.516                                     | 0.673                                     | 0.888                                     |
|         | 10            |           | 0.426                                     | 0.514                                     | 0.672                                     | 0.884                                     |
|         | 15            |           | 0.417                                     | 0.504                                     | 0.642                                     | 0.881                                     |
|         | 20            |           | 0.415                                     | 0.503                                     | 0.624                                     | 0.875                                     |
|         | 25            |           | 0.411                                     | 0.503                                     | 0.611                                     | 0.866                                     |
| N6      | 0             |           | 0.435                                     | 0.529                                     | 0.673                                     | 0.891                                     |
|         | 5             |           | 0.434                                     | 0.524                                     | 0.672                                     | 0.883                                     |
|         | 10            |           | 0.434                                     | 0.517                                     | 0.661                                     | 0.879                                     |
|         | 15            |           | 0.424                                     | 0.507                                     | 0.65                                      | 0.878                                     |
|         | 20            |           | 0.422                                     | 0.505                                     | 0.634                                     | 0.873                                     |
|         | 25            |           | 0.411                                     | 0.505                                     | 0.633                                     | 0.864                                     |
| N7      | 0             |           | 0.435                                     | 0.527                                     | 0.665                                     | 0.896                                     |
|         | 5             |           | 0.433                                     | 0.526                                     | 0.661                                     | 0.896                                     |
|         | 10            |           | 0.429                                     | 0.525                                     | 0.654                                     | 0.89                                      |
|         | 15            |           | 0.427                                     | 0.522                                     | 0.65                                      | 0.889                                     |
|         | 20            |           | 0.419                                     | 0.52                                      | 0.625                                     | 0.88                                      |
|         | 25            |           | 0.409                                     | 0.508                                     | 0.616                                     | 0.869                                     |
| N8      | 0             |           | 0.449                                     | 0.527                                     | 0.678                                     | 0.899                                     |
|         | 5             |           | 0.441                                     | 0.522                                     | 0.672                                     | 0.887                                     |
|         | 10            |           | 0.44                                      | 0.522                                     | 0.663                                     | 0.885                                     |
|         | 15            |           | 0.436                                     | 0.51                                      | 0.646                                     | 0.876                                     |
|         | 20            |           | 0.429                                     | 0.506                                     | 0.643                                     | 0.87                                      |
|         | 25            |           | 0.417                                     | 0.501                                     | 0.637                                     | 0.867                                     |
| N9      | 0             |           | 0.448                                     | 0.529                                     | 0.661                                     | 0.901                                     |
|         | 5             |           | 0.446                                     | 0.52                                      | 0.65                                      | 0.887                                     |
|         | 10            |           | 0.421                                     | 0.513                                     | 0.644                                     | 0.885                                     |
|         | 15            |           | 0.419                                     | 0.512                                     | 0.637                                     | 0.885                                     |
|         | 20            |           | 0.411                                     | 0.506                                     | 0.63                                      | 0.881                                     |
|         | 25            |           | 0.407                                     | 0.505                                     | 0.613                                     | 0.872                                     |
| N10     | 0             |           | 0.446                                     | 0.53                                      | 0.658                                     | 0.894                                     |
|         | 5             |           | 0.446                                     | 0.53                                      | 0.657                                     | 0.893                                     |
|         | 10            |           | 0.439                                     | 0.526                                     | 0.656                                     | 0.891                                     |
|         | 15            |           | 0.431                                     | 0.516                                     | 0.648                                     | 0.888                                     |
|         | 20            |           | 0.414                                     | 0.508                                     | 0.641                                     | 0.881                                     |
|         | 25            |           | 0.411                                     | 0.506                                     | 0.624                                     | 0.867                                     |
| N11     | 0             |           | 0.439                                     | 0.521                                     | 0.639                                     | 0.899                                     |
|         | 5             |           | 0.435                                     | 0.517                                     | 0.634                                     | 0.887                                     |
|         | 10            |           | 0.422                                     | 0.515                                     | 0.624                                     | 0.878                                     |
|         | 15            |           | 0.406                                     | 0.515                                     | 0.621                                     | 0.874                                     |
|         | 20            |           | 0.406                                     | 0.504                                     | 0.615                                     | 0.869                                     |
|         | 25            |           | 0.405                                     | 0.502                                     | 0.614                                     | 0.866                                     |
| N12     | 0             |           | 0.449                                     | 0.521                                     | 0.663                                     | 0.898                                     |
|         | 5             |           | 0.439                                     | 0.521                                     | 0.657                                     | 0.898                                     |
|         | 10            |           | 0.437                                     | 0.512                                     | 0.656                                     | 0.886                                     |
|         | 15            |           | 0.417                                     | 0.508                                     | 0.629                                     | 0.879                                     |
|         | 20            |           | 0.417                                     | 0.507                                     | 0.616                                     | 0.873                                     |
|         | 25            |           | 0.407                                     | 0.503                                     | 0.614                                     | 0.862                                     |

**Table 14.** Table shows  $GS^3$  scores obtained by aligning the original synthetic network with its noisy versions (adding edges) for all the networks. Table shows that the alignment quality does not get worse when considering colors.

| Network | Altered works | Net- | $GS^3$ on 1 coloured version | $GS^3$ on 2 coloured version | $GS^3$ on 3 coloured version | $GS^3$ on 4 coloured version |
|---------|---------------|------|------------------------------|------------------------------|------------------------------|------------------------------|
| N1      | 0             |      | 1                            | 1                            | 1                            | 1                            |
|         | 5             |      | 1                            | 1                            | 1                            | 1                            |
|         | 10            |      | 1                            | 1                            | 1                            | 1                            |
|         | 15            |      | 1                            | 1                            | 1                            | 1                            |
|         | 20            |      | 1                            | 1                            | 1                            | 1                            |
|         | 25            |      | 1                            | 1                            | 1                            | 1                            |
| N2      | 0             |      | 1                            | 1                            | 1                            | 1                            |
|         | 5             |      | 1                            | 1                            | 1                            | 1                            |
|         | 10            |      | 1                            | 1                            | 1                            | 1                            |
|         | 15            |      | 1                            | 1                            | 1                            | 1                            |
|         | 20            |      | 1                            | 1                            | 1                            | 1                            |
|         | 25            |      | 1                            | 1                            | 1                            | 1                            |
| N3      | 0             |      | 1                            | 1                            | 1                            | 1                            |
|         | 5             |      | 1                            | 1                            | 1                            | 1                            |
|         | 10            |      | 1                            | 1                            | 1                            | 1                            |
|         | 15            |      | 1                            | 1                            | 1                            | 1                            |
|         | 20            |      | 1                            | 1                            | 1                            | 1                            |
|         | 25            |      | 1                            | 1                            | 1                            | 1                            |
| N4      | 0             |      | 1                            | 1                            | 1                            | 1                            |
|         | 5             |      | 1                            | 1                            | 1                            | 1                            |
|         | 10            |      | 1                            | 1                            | 1                            | 1                            |
|         | 15            |      | 1                            | 1                            | 1                            | 1                            |
|         | 20            |      | 1                            | 1                            | 1                            | 1                            |
|         | 25            |      | 1                            | 1                            | 1                            | 1                            |
| N5      | 0             |      | 1                            | 1                            | 1                            | 1                            |
|         | 5             |      | 1                            | 1                            | 1                            | 1                            |
|         | 10            |      | 1                            | 1                            | 1                            | 1                            |
|         | 15            |      | 1                            | 1                            | 1                            | 1                            |
|         | 20            |      | 1                            | 1                            | 1                            | 1                            |
|         | 25            |      | 1                            | 1                            | 1                            | 1                            |
| N6      | 0             |      | 1                            | 1                            | 1                            | 1                            |
|         | 5             |      | 1                            | 1                            | 1                            | 1                            |
|         | 10            |      | 1                            | 1                            | 1                            | 1                            |
|         | 15            |      | 1                            | 1                            | 1                            | 1                            |
|         | 20            |      | 1                            | 1                            | 1                            | 1                            |
|         | 25            |      | 1                            | 1                            | 1                            | 1                            |
| N7      | 0             |      | 1                            | 1                            | 1                            | 1                            |
|         | 5             |      | 1                            | 1                            | 1                            | 1                            |
|         | 10            |      | 1                            | 1                            | 1                            | 1                            |
|         | 15            |      | 1                            | 1                            | 1                            | 1                            |
|         | 20            |      | 1                            | 1                            | 1                            | 1                            |
|         | 25            |      | 1                            | 1                            | 1                            | 1                            |
| N8      | 0             |      | 1                            | 1                            | 1                            | 1                            |
|         | 5             |      | 1                            | 1                            | 1                            | 1                            |
|         | 10            |      | 1                            | 1                            | 1                            | 1                            |
|         | 15            |      | 1                            | 1                            | 1                            | 1                            |
|         | 20            |      | 1                            | 1                            | 1                            | 1                            |
|         | 25            |      | 1                            | 1                            | 1                            | 1                            |
| N9      | 0             |      | 1                            | 1                            | 1                            | 1                            |
|         | 5             |      | 1                            | 1                            | 1                            | 1                            |
|         | 10            |      | 1                            | 1                            | 1                            | 1                            |
|         | 15            |      | 1                            | 1                            | 1                            | 1                            |
|         | 20            |      | 1                            | 1                            | 1                            | 1                            |
|         | 25            |      | 1                            | 1                            | 1                            | 1                            |
| N10     | 0             |      | 1                            | 1                            | 1                            | 1                            |
|         | 5             |      | 1                            | 1                            | 1                            | 1                            |
|         | 10            |      | 1                            | 1                            | 1                            | 1                            |
|         | 15            |      | 1                            | 1                            | 1                            | 1                            |
|         | 20            |      | 1                            | 1                            | 1                            | 1                            |
|         | 25            |      | 1                            | 1                            | 1                            | 1                            |
| N11     | 0             |      | 1                            | 1                            | 1                            | 1                            |
|         | 5             |      | 1                            | 1                            | 1                            | 1                            |
|         | 10            |      | 1                            | 1                            | 1                            | 1                            |
|         | 15            |      | 1                            | 1                            | 1                            | 1                            |
|         | 20            |      | 1                            | 1                            | 1                            | 1                            |
|         | 25            |      | 1                            | 1                            | 1                            | 1                            |
| N12     | 0             |      | 1                            | 1                            | 1                            | 1                            |
|         | 5             |      | 1                            | 1                            | 1                            | 1                            |
|         | 10            |      | 1                            | 1                            | 1                            | 1                            |
|         | 15            |      | 1                            | 1                            | 1                            | 1                            |
|         | 20            |      | 1                            | 1                            | 1                            | 1                            |
|         | 25            |      | 1                            | 1                            | 1                            | 1                            |

**Quality of the Alignments for Hetionet network with noise.**

**Quality of the alignments for synthetic heterogeneous networks obtained by aligning each network with its noisy versions built by adding a percentage of nodes**

Table 25, Table 26, Table 27, Table 28, Table 29, Table 30 report the NCV-GS<sup>3</sup>, GS<sup>3</sup>, NCV, P-NC, R-NC, F-NC measures computed on each module for the four versions of synthetic heterogeneous networks obtained by aligning each network with its noisy versions built by adding a percentage of nodes.

Table 31, Table 32, Table 33, Table 34, Table 35, Table 36 report the NCV-GS<sup>3</sup>, GS<sup>3</sup>, NCV, P-NC, R-NC, F-NC measures computed on each module for the four versions of the Hetionet network obtained by aligning each network with its noisy counterpart built by adding a percentage of nodes.

**Quality of the alignments of Hetionet network obtained by aligning each network with its noisy versions built by adding a percentage of nodes**

**Table 15.** Table shows the NCV scores obtained by aligning the original synthetic network with its noisy versions for all the networks. The altered networks are generated by randomly adding edges. Table shows a significant improvement of the quality of the alignments when considering networks with many colours. The improvement is also stable for all the networks.

| Network | Altered works | Net-works | NCV on 1 coloured version | NCV on 2 coloured version | NCV on 3 coloured version | NCV on 4 coloured version |
|---------|---------------|-----------|---------------------------|---------------------------|---------------------------|---------------------------|
| N1      | 0             |           | 0.181                     | 0.271                     | 0.458                     | 0.797                     |
|         | 5             |           | 0.181                     | 0.268                     | 0.454                     | 0.792                     |
|         | 10            |           | 0.179                     | 0.266                     | 0.43                      | 0.79                      |
|         | 15            |           | 0.176                     | 0.266                     | 0.417                     | 0.757                     |
|         | 20            |           | 0.176                     | 0.258                     | 0.415                     | 0.755                     |
|         | 25            |           | 0.166                     | 0.257                     | 0.399                     | 0.753                     |
| N2      | 0             |           | 0.198                     | 0.278                     | 0.453                     | 0.812                     |
|         | 5             |           | 0.187                     | 0.278                     | 0.452                     | 0.81                      |
|         | 10            |           | 0.183                     | 0.277                     | 0.44                      | 0.766                     |
|         | 15            |           | 0.181                     | 0.257                     | 0.434                     | 0.762                     |
|         | 20            |           | 0.178                     | 0.254                     | 0.403                     | 0.76                      |
|         | 25            |           | 0.171                     | 0.253                     | 0.378                     | 0.757                     |
| N3      | 0             |           | 0.198                     | 0.281                     | 0.46                      | 0.79                      |
|         | 5             |           | 0.195                     | 0.278                     | 0.456                     | 0.778                     |
|         | 10            |           | 0.192                     | 0.272                     | 0.448                     | 0.774                     |
|         | 15            |           | 0.19                      | 0.262                     | 0.44                      | 0.769                     |
|         | 20            |           | 0.184                     | 0.259                     | 0.378                     | 0.743                     |
|         | 25            |           | 0.173                     | 0.254                     | 0.373                     | 0.741                     |
| N4      | 0             |           | 0.2                       | 0.276                     | 0.461                     | 0.81                      |
|         | 5             |           | 0.182                     | 0.274                     | 0.42                      | 0.806                     |
|         | 10            |           | 0.177                     | 0.27                      | 0.42                      | 0.806                     |
|         | 15            |           | 0.175                     | 0.259                     | 0.41                      | 0.799                     |
|         | 20            |           | 0.171                     | 0.255                     | 0.391                     | 0.785                     |
|         | 25            |           | 0.166                     | 0.253                     | 0.379                     | 0.755                     |
| N5      | 0             |           | 0.197                     | 0.267                     | 0.456                     | 0.801                     |
|         | 5             |           | 0.186                     | 0.266                     | 0.453                     | 0.789                     |
|         | 10            |           | 0.181                     | 0.264                     | 0.452                     | 0.781                     |
|         | 15            |           | 0.174                     | 0.254                     | 0.412                     | 0.776                     |
|         | 20            |           | 0.172                     | 0.253                     | 0.389                     | 0.766                     |
|         | 25            |           | 0.169                     | 0.253                     | 0.373                     | 0.75                      |
| N6      | 0             |           | 0.189                     | 0.28                      | 0.453                     | 0.794                     |
|         | 5             |           | 0.188                     | 0.275                     | 0.452                     | 0.78                      |
|         | 10            |           | 0.188                     | 0.267                     | 0.437                     | 0.773                     |
|         | 15            |           | 0.18                      | 0.257                     | 0.423                     | 0.771                     |
|         | 20            |           | 0.178                     | 0.255                     | 0.402                     | 0.762                     |
|         | 25            |           | 0.169                     | 0.255                     | 0.401                     | 0.746                     |
| N7      | 0             |           | 0.189                     | 0.278                     | 0.442                     | 0.803                     |
|         | 5             |           | 0.187                     | 0.277                     | 0.437                     | 0.803                     |
|         | 10            |           | 0.184                     | 0.276                     | 0.428                     | 0.792                     |
|         | 15            |           | 0.182                     | 0.272                     | 0.423                     | 0.79                      |
|         | 20            |           | 0.176                     | 0.27                      | 0.391                     | 0.774                     |
|         | 25            |           | 0.167                     | 0.258                     | 0.379                     | 0.755                     |
| N8      | 0             |           | 0.202                     | 0.278                     | 0.46                      | 0.808                     |
|         | 5             |           | 0.194                     | 0.272                     | 0.452                     | 0.787                     |
|         | 10            |           | 0.194                     | 0.272                     | 0.44                      | 0.783                     |
|         | 15            |           | 0.19                      | 0.26                      | 0.417                     | 0.767                     |
|         | 20            |           | 0.184                     | 0.256                     | 0.413                     | 0.757                     |
|         | 25            |           | 0.174                     | 0.251                     | 0.406                     | 0.752                     |
| N9      | 0             |           | 0.201                     | 0.28                      | 0.437                     | 0.812                     |
|         | 5             |           | 0.199                     | 0.27                      | 0.423                     | 0.787                     |
|         | 10            |           | 0.177                     | 0.263                     | 0.415                     | 0.783                     |
|         | 15            |           | 0.176                     | 0.262                     | 0.406                     | 0.783                     |
|         | 20            |           | 0.169                     | 0.256                     | 0.397                     | 0.776                     |
|         | 25            |           | 0.166                     | 0.255                     | 0.376                     | 0.76                      |
| N10     | 0             |           | 0.199                     | 0.281                     | 0.433                     | 0.799                     |
|         | 5             |           | 0.199                     | 0.281                     | 0.432                     | 0.797                     |
|         | 10            |           | 0.193                     | 0.277                     | 0.43                      | 0.794                     |
|         | 15            |           | 0.186                     | 0.266                     | 0.42                      | 0.789                     |
|         | 20            |           | 0.171                     | 0.258                     | 0.411                     | 0.776                     |
|         | 25            |           | 0.169                     | 0.256                     | 0.389                     | 0.752                     |
| N11     | 0             |           | 0.193                     | 0.271                     | 0.408                     | 0.808                     |
|         | 5             |           | 0.189                     | 0.267                     | 0.402                     | 0.787                     |
|         | 10            |           | 0.178                     | 0.265                     | 0.389                     | 0.771                     |
|         | 15            |           | 0.165                     | 0.265                     | 0.386                     | 0.764                     |
|         | 20            |           | 0.165                     | 0.254                     | 0.378                     | 0.755                     |
|         | 25            |           | 0.164                     | 0.252                     | 0.377                     | 0.75                      |
| N12     | 0             |           | 0.202                     | 0.271                     | 0.44                      | 0.806                     |
|         | 5             |           | 0.193                     | 0.271                     | 0.432                     | 0.806                     |
|         | 10            |           | 0.191                     | 0.262                     | 0.43                      | 0.785                     |
|         | 15            |           | 0.174                     | 0.258                     | 0.396                     | 0.773                     |
|         | 20            |           | 0.174                     | 0.257                     | 0.379                     | 0.762                     |
|         | 25            |           | 0.166                     | 0.253                     | 0.377                     | 0.743                     |



**Table 16.** P-NC scores obtained by aligning the original synthetic network with its noisy versions (adding edges) for all the networks. Table shows that the alignment quality is constant by considering networks with many colours.

| Network | Altered works | Net- | P-NC on 1 coloured version | P-NC on 2 coloured version | P-NC on 3 coloured version | P-NC on 4 coloured version |
|---------|---------------|------|----------------------------|----------------------------|----------------------------|----------------------------|
| N1      | 0             |      | 1                          | 1                          | 1                          | 1                          |
|         | 5             |      | 1                          | 1                          | 1                          | 1                          |
|         | 10            |      | 1                          | 1                          | 1                          | 1                          |
|         | 15            |      | 1                          | 1                          | 1                          | 1                          |
|         | 20            |      | 1                          | 1                          | 1                          | 1                          |
|         | 25            |      | 1                          | 1                          | 1                          | 1                          |
| N2      | 0             |      | 1                          | 1                          | 1                          | 1                          |
|         | 5             |      | 1                          | 1                          | 1                          | 1                          |
|         | 10            |      | 1                          | 1                          | 1                          | 1                          |
|         | 15            |      | 1                          | 1                          | 1                          | 1                          |
|         | 20            |      | 1                          | 1                          | 1                          | 1                          |
|         | 25            |      | 1                          | 1                          | 1                          | 1                          |
| N3      | 0             |      | 1                          | 1                          | 1                          | 1                          |
|         | 5             |      | 1                          | 1                          | 1                          | 1                          |
|         | 10            |      | 1                          | 1                          | 1                          | 1                          |
|         | 15            |      | 1                          | 1                          | 1                          | 1                          |
|         | 20            |      | 1                          | 1                          | 1                          | 1                          |
|         | 25            |      | 1                          | 1                          | 1                          | 1                          |
| N4      | 0             |      | 1                          | 1                          | 1                          | 1                          |
|         | 5             |      | 1                          | 1                          | 1                          | 1                          |
|         | 10            |      | 1                          | 1                          | 1                          | 1                          |
|         | 15            |      | 1                          | 1                          | 1                          | 1                          |
|         | 20            |      | 1                          | 1                          | 1                          | 1                          |
|         | 25            |      | 1                          | 1                          | 1                          | 1                          |
| N5      | 0             |      | 1                          | 1                          | 1                          | 1                          |
|         | 5             |      | 1                          | 1                          | 1                          | 1                          |
|         | 10            |      | 1                          | 1                          | 1                          | 1                          |
|         | 15            |      | 1                          | 1                          | 1                          | 1                          |
|         | 20            |      | 1                          | 1                          | 1                          | 1                          |
|         | 25            |      | 1                          | 1                          | 1                          | 1                          |
| N6      | 0             |      | 1                          | 1                          | 1                          | 1                          |
|         | 5             |      | 1                          | 1                          | 1                          | 1                          |
|         | 10            |      | 1                          | 1                          | 1                          | 1                          |
|         | 15            |      | 1                          | 1                          | 1                          | 1                          |
|         | 20            |      | 1                          | 1                          | 1                          | 1                          |
|         | 25            |      | 1                          | 1                          | 1                          | 1                          |
| N7      | 0             |      | 1                          | 1                          | 1                          | 1                          |
|         | 5             |      | 1                          | 1                          | 1                          | 1                          |
|         | 10            |      | 1                          | 1                          | 1                          | 1                          |
|         | 15            |      | 1                          | 1                          | 1                          | 1                          |
|         | 20            |      | 1                          | 1                          | 1                          | 1                          |
|         | 25            |      | 1                          | 1                          | 1                          | 1                          |
| N8      | 0             |      | 1                          | 1                          | 1                          | 1                          |
|         | 5             |      | 1                          | 1                          | 1                          | 1                          |
|         | 10            |      | 1                          | 1                          | 1                          | 1                          |
|         | 15            |      | 1                          | 1                          | 1                          | 1                          |
|         | 20            |      | 1                          | 1                          | 1                          | 1                          |
|         | 25            |      | 1                          | 1                          | 1                          | 1                          |
| N9      | 0             |      | 1                          | 1                          | 1                          | 1                          |
|         | 5             |      | 1                          | 1                          | 1                          | 1                          |
|         | 10            |      | 1                          | 1                          | 1                          | 1                          |
|         | 15            |      | 1                          | 1                          | 1                          | 1                          |
|         | 20            |      | 1                          | 1                          | 1                          | 1                          |
|         | 25            |      | 1                          | 1                          | 1                          | 1                          |
| N10     | 0             |      | 1                          | 1                          | 1                          | 1                          |
|         | 5             |      | 1                          | 1                          | 1                          | 1                          |
|         | 10            |      | 1                          | 1                          | 1                          | 1                          |
|         | 15            |      | 1                          | 1                          | 1                          | 1                          |
|         | 20            |      | 1                          | 1                          | 1                          | 1                          |
|         | 25            |      | 1                          | 1                          | 1                          | 1                          |
| N11     | 0             |      | 1                          | 1                          | 1                          | 1                          |
|         | 5             |      | 1                          | 1                          | 1                          | 1                          |
|         | 10            |      | 1                          | 1                          | 1                          | 1                          |
|         | 15            |      | 1                          | 1                          | 1                          | 1                          |
|         | 20            |      | 1                          | 1                          | 1                          | 1                          |
|         | 25            |      | 1                          | 1                          | 1                          | 1                          |
| N12     | 0             |      | 1                          | 1                          | 1                          | 1                          |
|         | 5             |      | 1                          | 1                          | 1                          | 1                          |
|         | 10            |      | 1                          | 1                          | 1                          | 1                          |
|         | 15            |      | 1                          | 1                          | 1                          | 1                          |
|         | 20            |      | 1                          | 1                          | 1                          | 1                          |
|         | 25            |      | 1                          | 1                          | 1                          | 1                          |

**Table 17.** Table shows the R-NCscores obtained by aligning the original synthetic network with its noisy versions for all the networks. The altered networks are generated by randomly adding edges. Table shows a significant improvement of the quality of the alignments when considering networks with many colours. The improvement is also stable for all the networks.

| Network | Altered works | Net-works | R-NC on 1 coloured version | R-NC on 2 coloured version | R-NC on 3 coloured version | R-NC on 4 coloured version |
|---------|---------------|-----------|----------------------------|----------------------------|----------------------------|----------------------------|
| N1      | 0             |           | 0.138                      | 0.476                      | 0.623                      | 0.651                      |
|         | 5             |           | 0.131                      | 0.453                      | 0.612                      | 0.651                      |
|         | 10            |           | 0.116                      | 0.446                      | 0.607                      | 0.651                      |
|         | 15            |           | 0.109                      | 0.441                      | 0.548                      | 0.65                       |
|         | 20            |           | 0.1                        | 0.44                       | 0.546                      | 0.646                      |
|         | 25            |           | 0.096                      | 0.386                      | 0.513                      | 0.646                      |
| N2      | 0             |           | 0.137                      | 0.464                      | 0.634                      | 0.654                      |
|         | 5             |           | 0.135                      | 0.464                      | 0.616                      | 0.653                      |
|         | 10            |           | 0.122                      | 0.462                      | 0.616                      | 0.646                      |
|         | 15            |           | 0.121                      | 0.426                      | 0.596                      | 0.645                      |
|         | 20            |           | 0.114                      | 0.394                      | 0.567                      | 0.645                      |
|         | 25            |           | 0.113                      | 0.384                      | 0.566                      | 0.64                       |
| N3      | 0             |           | 0.158                      | 0.424                      | 0.607                      | 0.654                      |
|         | 5             |           | 0.152                      | 0.423                      | 0.596                      | 0.653                      |
|         | 10            |           | 0.147                      | 0.367                      | 0.594                      | 0.651                      |
|         | 15            |           | 0.144                      | 0.366                      | 0.498                      | 0.646                      |
|         | 20            |           | 0.127                      | 0.365                      | 0.497                      | 0.645                      |
|         | 25            |           | 0.096                      | 0.361                      | 0.497                      | 0.642                      |
| N4      | 0             |           | 0.141                      | 0.423                      | 0.627                      | 0.656                      |
|         | 5             |           | 0.141                      | 0.411                      | 0.624                      | 0.656                      |
|         | 10            |           | 0.114                      | 0.41                       | 0.618                      | 0.654                      |
|         | 15            |           | 0.11                       | 0.401                      | 0.516                      | 0.653                      |
|         | 20            |           | 0.105                      | 0.376                      | 0.514                      | 0.65                       |
|         | 25            |           | 0.095                      | 0.361                      | 0.513                      | 0.646                      |
| N5      | 0             |           | 0.149                      | 0.454                      | 0.634                      | 0.651                      |
|         | 5             |           | 0.149                      | 0.434                      | 0.608                      | 0.651                      |
|         | 10            |           | 0.141                      | 0.434                      | 0.605                      | 0.65                       |
|         | 15            |           | 0.129                      | 0.432                      | 0.601                      | 0.648                      |
|         | 20            |           | 0.115                      | 0.425                      | 0.529                      | 0.648                      |
|         | 25            |           | 0.108                      | 0.423                      | 0.507                      | 0.643                      |
| N6      | 0             |           | 0.152                      | 0.466                      | 0.619                      | 0.656                      |
|         | 5             |           | 0.126                      | 0.425                      | 0.618                      | 0.653                      |
|         | 10            |           | 0.116                      | 0.412                      | 0.599                      | 0.653                      |
|         | 15            |           | 0.111                      | 0.402                      | 0.591                      | 0.65                       |
|         | 20            |           | 0.1                        | 0.397                      | 0.51                       | 0.646                      |
|         | 25            |           | 0.097                      | 0.366                      | 0.501                      | 0.643                      |
| N7      | 0             |           | 0.143                      | 0.429                      | 0.63                       | 0.656                      |
|         | 5             |           | 0.141                      | 0.428                      | 0.564                      | 0.648                      |
|         | 10            |           | 0.13                       | 0.41                       | 0.562                      | 0.646                      |
|         | 15            |           | 0.123                      | 0.404                      | 0.557                      | 0.643                      |
|         | 20            |           | 0.106                      | 0.399                      | 0.534                      | 0.642                      |
|         | 25            |           | 0.101                      | 0.387                      | 0.497                      | 0.64                       |
| N8      | 0             |           | 0.135                      | 0.471                      | 0.638                      | 0.656                      |
|         | 5             |           | 0.127                      | 0.45                       | 0.612                      | 0.653                      |
|         | 10            |           | 0.12                       | 0.429                      | 0.548                      | 0.653                      |
|         | 15            |           | 0.118                      | 0.419                      | 0.539                      | 0.653                      |
|         | 20            |           | 0.109                      | 0.381                      | 0.531                      | 0.65                       |
|         | 25            |           | 0.095                      | 0.376                      | 0.503                      | 0.646                      |
| N9      | 0             |           | 0.138                      | 0.434                      | 0.635                      | 0.654                      |
|         | 5             |           | 0.137                      | 0.428                      | 0.632                      | 0.651                      |
|         | 10            |           | 0.135                      | 0.411                      | 0.566                      | 0.65                       |
|         | 15            |           | 0.128                      | 0.403                      | 0.543                      | 0.646                      |
|         | 20            |           | 0.124                      | 0.399                      | 0.508                      | 0.645                      |
|         | 25            |           | 0.102                      | 0.376                      | 0.503                      | 0.643                      |
| N10     | 0             |           | 0.151                      | 0.456                      | 0.579                      | 0.653                      |
|         | 5             |           | 0.145                      | 0.436                      | 0.557                      | 0.648                      |
|         | 10            |           | 0.135                      | 0.433                      | 0.557                      | 0.648                      |
|         | 15            |           | 0.127                      | 0.433                      | 0.551                      | 0.645                      |
|         | 20            |           | 0.119                      | 0.419                      | 0.54                       | 0.645                      |
|         | 25            |           | 0.099                      | 0.402                      | 0.529                      | 0.64                       |
| N11     | 0             |           | 0.15                       | 0.471                      | 0.63                       | 0.656                      |
|         | 5             |           | 0.132                      | 0.462                      | 0.607                      | 0.656                      |
|         | 10            |           | 0.116                      | 0.458                      | 0.576                      | 0.653                      |
|         | 15            |           | 0.106                      | 0.44                       | 0.572                      | 0.648                      |
|         | 20            |           | 0.094                      | 0.416                      | 0.567                      | 0.648                      |
|         | 25            |           | 0.093                      | 0.394                      | 0.533                      | 0.642                      |
| N12     | 0             |           | 0.144                      | 0.468                      | 0.619                      | 0.654                      |
|         | 5             |           | 0.132                      | 0.465                      | 0.619                      | 0.651                      |
|         | 10            |           | 0.122                      | 0.444                      | 0.582                      | 0.65                       |
|         | 15            |           | 0.122                      | 0.382                      | 0.548                      | 0.648                      |
|         | 20            |           | 0.107                      | 0.375                      | 0.503                      | 0.645                      |
|         | 25            |           | 0.1                        | 0.366                      | 0.498                      | 0.643                      |

**Table 18.** Table shows the F-NC scores obtained by aligning the original synthetic network with its noisy versions for all the networks. The altered networks are generated by randomly adding edges. Table shows a significant improvement of the quality of the alignments when considering networks with many colours. The improvement is also stable for all the networks.

| Network | Altered works | Net-works | F-NC on 1 coloured version | F-NC on 2 coloured version | F-NC on 3 coloured version | F-NC on 4 coloured version |
|---------|---------------|-----------|----------------------------|----------------------------|----------------------------|----------------------------|
| N1      | 0             |           | 0.371                      | 0.69                       | 0.789                      | 0.807                      |
|         | 5             |           | 0.362                      | 0.673                      | 0.782                      | 0.807                      |
|         | 10            |           | 0.341                      | 0.668                      | 0.779                      | 0.807                      |
|         | 15            |           | 0.33                       | 0.664                      | 0.74                       | 0.806                      |
|         | 20            |           | 0.317                      | 0.663                      | 0.739                      | 0.804                      |
|         | 25            |           | 0.31                       | 0.621                      | 0.716                      | 0.804                      |
| N2      | 0             |           | 0.37                       | 0.681                      | 0.796                      | 0.809                      |
|         | 5             |           | 0.367                      | 0.681                      | 0.785                      | 0.808                      |
|         | 10            |           | 0.35                       | 0.68                       | 0.785                      | 0.804                      |
|         | 15            |           | 0.348                      | 0.653                      | 0.772                      | 0.803                      |
|         | 20            |           | 0.338                      | 0.628                      | 0.753                      | 0.803                      |
|         | 25            |           | 0.336                      | 0.62                       | 0.752                      | 0.8                        |
| N3      | 0             |           | 0.398                      | 0.651                      | 0.779                      | 0.809                      |
|         | 5             |           | 0.39                       | 0.65                       | 0.772                      | 0.808                      |
|         | 10            |           | 0.383                      | 0.606                      | 0.771                      | 0.807                      |
|         | 15            |           | 0.38                       | 0.605                      | 0.706                      | 0.804                      |
|         | 20            |           | 0.357                      | 0.604                      | 0.705                      | 0.803                      |
|         | 25            |           | 0.31                       | 0.601                      | 0.705                      | 0.801                      |
| N4      | 0             |           | 0.376                      | 0.65                       | 0.792                      | 0.81                       |
|         | 5             |           | 0.375                      | 0.641                      | 0.79                       | 0.81                       |
|         | 10            |           | 0.337                      | 0.64                       | 0.786                      | 0.809                      |
|         | 15            |           | 0.332                      | 0.633                      | 0.718                      | 0.808                      |
|         | 20            |           | 0.324                      | 0.613                      | 0.717                      | 0.806                      |
|         | 25            |           | 0.309                      | 0.601                      | 0.716                      | 0.804                      |
| N5      | 0             |           | 0.386                      | 0.674                      | 0.796                      | 0.807                      |
|         | 5             |           | 0.386                      | 0.659                      | 0.78                       | 0.807                      |
|         | 10            |           | 0.376                      | 0.659                      | 0.778                      | 0.806                      |
|         | 15            |           | 0.359                      | 0.657                      | 0.775                      | 0.805                      |
|         | 20            |           | 0.339                      | 0.652                      | 0.727                      | 0.805                      |
|         | 25            |           | 0.328                      | 0.65                       | 0.712                      | 0.802                      |
| N6      | 0             |           | 0.39                       | 0.683                      | 0.787                      | 0.81                       |
|         | 5             |           | 0.355                      | 0.652                      | 0.786                      | 0.808                      |
|         | 10            |           | 0.34                       | 0.642                      | 0.774                      | 0.808                      |
|         | 15            |           | 0.333                      | 0.634                      | 0.769                      | 0.806                      |
|         | 20            |           | 0.317                      | 0.63                       | 0.714                      | 0.804                      |
|         | 25            |           | 0.311                      | 0.605                      | 0.708                      | 0.802                      |
| N7      | 0             |           | 0.378                      | 0.655                      | 0.794                      | 0.81                       |
|         | 5             |           | 0.376                      | 0.654                      | 0.751                      | 0.805                      |
|         | 10            |           | 0.36                       | 0.64                       | 0.75                       | 0.804                      |
|         | 15            |           | 0.351                      | 0.636                      | 0.746                      | 0.802                      |
|         | 20            |           | 0.325                      | 0.632                      | 0.731                      | 0.801                      |
|         | 25            |           | 0.318                      | 0.622                      | 0.705                      | 0.8                        |
| N8      | 0             |           | 0.368                      | 0.686                      | 0.799                      | 0.81                       |
|         | 5             |           | 0.356                      | 0.671                      | 0.782                      | 0.808                      |
|         | 10            |           | 0.346                      | 0.655                      | 0.74                       | 0.808                      |
|         | 15            |           | 0.343                      | 0.647                      | 0.734                      | 0.808                      |
|         | 20            |           | 0.33                       | 0.617                      | 0.729                      | 0.806                      |
|         | 25            |           | 0.309                      | 0.613                      | 0.709                      | 0.804                      |
| N9      | 0             |           | 0.371                      | 0.659                      | 0.797                      | 0.809                      |
|         | 5             |           | 0.37                       | 0.654                      | 0.795                      | 0.807                      |
|         | 10            |           | 0.368                      | 0.641                      | 0.752                      | 0.806                      |
|         | 15            |           | 0.358                      | 0.635                      | 0.737                      | 0.804                      |
|         | 20            |           | 0.352                      | 0.632                      | 0.713                      | 0.803                      |
|         | 25            |           | 0.32                       | 0.613                      | 0.709                      | 0.802                      |
| N10     | 0             |           | 0.388                      | 0.675                      | 0.761                      | 0.808                      |
|         | 5             |           | 0.381                      | 0.66                       | 0.746                      | 0.805                      |
|         | 10            |           | 0.367                      | 0.658                      | 0.746                      | 0.805                      |
|         | 15            |           | 0.357                      | 0.658                      | 0.742                      | 0.803                      |
|         | 20            |           | 0.345                      | 0.647                      | 0.735                      | 0.803                      |
|         | 25            |           | 0.314                      | 0.634                      | 0.727                      | 0.8                        |
| N11     | 0             |           | 0.387                      | 0.686                      | 0.794                      | 0.81                       |
|         | 5             |           | 0.363                      | 0.68                       | 0.779                      | 0.81                       |
|         | 10            |           | 0.341                      | 0.677                      | 0.759                      | 0.808                      |
|         | 15            |           | 0.326                      | 0.663                      | 0.756                      | 0.805                      |
|         | 20            |           | 0.307                      | 0.645                      | 0.753                      | 0.805                      |
|         | 25            |           | 0.305                      | 0.628                      | 0.73                       | 0.801                      |
| N12     | 0             |           | 0.379                      | 0.684                      | 0.787                      | 0.809                      |
|         | 5             |           | 0.363                      | 0.682                      | 0.787                      | 0.807                      |
|         | 10            |           | 0.35                       | 0.666                      | 0.763                      | 0.806                      |
|         | 15            |           | 0.349                      | 0.618                      | 0.74                       | 0.805                      |
|         | 20            |           | 0.327                      | 0.612                      | 0.709                      | 0.803                      |
|         | 25            |           | 0.317                      | 0.605                      | 0.706                      | 0.802                      |

**Table 19.** Table summarises NCV-GS<sup>3</sup> scores obtained by aligning the original Hetionet network with its noisy versions obtained by adding edges to the first one. Table shows a remarkable trend of improvement when considering networks with many colours.

| Network  | Altered Networks | NCV-GS <sup>3</sup> on 1 coloured version | NCV-GS <sup>3</sup> on 2 coloured version | NCV-GS <sup>3</sup> on 3 coloured version | NCV-GS <sup>3</sup> on 4 coloured version |
|----------|------------------|-------------------------------------------|-------------------------------------------|-------------------------------------------|-------------------------------------------|
| Hetionet | 0% of noise      | 0.448                                     | 0.521                                     | 0.673                                     | 0.898                                     |
|          | 5% of noise      | 0.446                                     | 0.517                                     | 0.672                                     | 0.896                                     |
|          | 10% of noise     | 0.421                                     | 0.515                                     | 0.663                                     | 0.89                                      |
|          | 15% of noise     | 0.419                                     | 0.515                                     | 0.659                                     | 0.889                                     |
|          | 20% of noise     | 0.411                                     | 0.504                                     | 0.635                                     | 0.88                                      |
|          | 25% of noise     | 0.407                                     | 0.502                                     | 0.615                                     | 0.869                                     |

**Table 20.** Table summarises GS<sup>3</sup> scores obtained by aligning the original Hetionet network with its noisy versions. Altered networks are obtained by adding edges randomly. Table shows that the alignment quality is constant when considering networks with many colours.

| Network  | Altered Networks | GS <sup>3</sup> on 1 coloured version | GS <sup>3</sup> on 2 coloured version | GS <sup>3</sup> on 3 coloured version | GS <sup>3</sup> on 4 coloured version |
|----------|------------------|---------------------------------------|---------------------------------------|---------------------------------------|---------------------------------------|
| Hetionet | 0% of noise      | 1                                     | 1                                     | 1                                     | 1                                     |
|          | 5% of noise      | 1                                     | 1                                     | 1                                     | 1                                     |
|          | 10% of noise     | 1                                     | 1                                     | 1                                     | 1                                     |
|          | 15% of noise     | 1                                     | 1                                     | 1                                     | 1                                     |
|          | 20% of noise     | 1                                     | 1                                     | 1                                     | 1                                     |
|          | 25% of noise     | 1                                     | 1                                     | 1                                     | 1                                     |

**Table 21.** Table summarises the NCV scores obtained by aligning the original Hetionet network with its noisy versions. Altered networks presents more random edges. Table shows a remarkable trend of improvement when considering networks with many colours for all the networks.

| Network  | Altered Networks | NCV on 1 coloured version | NCV on 2 coloured version | NCV on 3 coloured version | NCV on 4 coloured version |
|----------|------------------|---------------------------|---------------------------|---------------------------|---------------------------|
| Hetionet | 0% of noise      | 0.201                     | 0.271                     | 0.453                     | 0.803                     |
|          | 5% of noise      | 0.199                     | 0.267                     | 0.452                     | 0.803                     |
|          | 10% of noise     | 0.177                     | 0.265                     | 0.44                      | 0.792                     |
|          | 15% of noise     | 0.176                     | 0.265                     | 0.434                     | 0.79                      |
|          | 20% of noise     | 0.169                     | 0.254                     | 0.403                     | 0.774                     |
|          | 25% of noise     | 0.166                     | 0.252                     | 0.378                     | 0.755                     |

**Table 22.** Table summarises P-NC scores obtained by aligning the original Hetionet network with its noisy versions. Table shows that the alignment quality is constant when considering colours.

| Network  | Altered Networks | P-NC on 1 coloured version | P-NC on 2 coloured version | P-NC on 3 coloured version | P-NC on 4 coloured version |
|----------|------------------|----------------------------|----------------------------|----------------------------|----------------------------|
| Hetionet | 0% of noise      | 1                          | 1                          | 1                          | 1                          |
|          | 5% of noise      | 1                          | 1                          | 1                          | 1                          |
|          | 10% of noise     | 1                          | 1                          | 1                          | 1                          |
|          | 15% of noise     | 1                          | 1                          | 1                          | 1                          |
|          | 20% of noise     | 1                          | 1                          | 1                          | 1                          |
|          | 25% of noise     | 1                          | 1                          | 1                          | 1                          |

**Table 23.** Table summarises the R-NC scores obtained by aligning the original Hetionet network with its noisy versions when adding edges. Table shows a remarkable trend of improvement when considering networks with many colours.

| Network  | Altered Networks | R-NC on 1 coloured version | R-NC on 2 coloured version | R-NC on 3 coloured version | R-NC on 4 coloured version |
|----------|------------------|----------------------------|----------------------------|----------------------------|----------------------------|
| Hetionet | 0% of noise      | 0.158                      | 0.471                      | 0.638                      | 0.656                      |
|          | 5% of noise      | 0.152                      | 0.462                      | 0.612                      | 0.648                      |
|          | 10% of noise     | 0.147                      | 0.458                      | 0.548                      | 0.646                      |
|          | 15% of noise     | 0.144                      | 0.44                       | 0.539                      | 0.643                      |
|          | 20% of noise     | 0.127                      | 0.416                      | 0.531                      | 0.642                      |
|          | 25% of noise     | 0.096                      | 0.394                      | 0.503                      | 0.64                       |

**Table 24.** Table summarises the F-NC scores obtained by aligning the original Hetionet network with its noisy versions when adding edges. Table shows a remarkable trend of improvement when considering networks with many colours.

| Network  | Altered Networks | F-NC on 1 coloured version | F-NC on 2 coloured version | F-NC on 3 coloured version | F-NC on 4 coloured version |
|----------|------------------|----------------------------|----------------------------|----------------------------|----------------------------|
| Hetionet | 0% of noise      | 0.398                      | 0.686                      | 0.799                      | 0.81                       |
|          | 5% of noise      | 0.39                       | 0.68                       | 0.782                      | 0.805                      |
|          | 10% of noise     | 0.383                      | 0.677                      | 0.74                       | 0.804                      |
|          | 15% of noise     | 0.38                       | 0.663                      | 0.734                      | 0.802                      |
|          | 20% of noise     | 0.357                      | 0.645                      | 0.729                      | 0.801                      |
|          | 25% of noise     | 0.31                       | 0.628                      | 0.709                      | 0.8                        |

**Table 25.** The table shows the NCV-GS<sup>3</sup> scores obtained by aligning the original synthetic network with its noisy versions when adding nodes for all the networks. Table shows a significant improvement of the quality of the alignments when considering networks with many colours. The improvement is also stable for all the networks.

| Network | Altered works | Net-works | NCV-GS <sup>3</sup> on 1 coloured version | NCV-GS <sup>3</sup> on 2 coloured version | NCV-GS <sup>3</sup> on 3 coloured version | NCV-GS <sup>3</sup> on 4 coloured version |
|---------|---------------|-----------|-------------------------------------------|-------------------------------------------|-------------------------------------------|-------------------------------------------|
| N1      | 0             |           | 0.281                                     | 0.409                                     | 0.564                                     | 0.746                                     |
|         | 5             |           | 0.28                                      | 0.407                                     | 0.559                                     | 0.732                                     |
|         | 10            |           | 0.278                                     | 0.405                                     | 0.557                                     | 0.723                                     |
|         | 15            |           | 0.274                                     | 0.402                                     | 0.552                                     | 0.705                                     |
|         | 20            |           | 0.266                                     | 0.397                                     | 0.549                                     | 0.686                                     |
|         | 25            |           | 0.257                                     | 0.395                                     | 0.52                                      | 0.683                                     |
| N2      | 0             |           | 0.299                                     | 0.403                                     | 0.566                                     | 0.719                                     |
|         | 5             |           | 0.295                                     | 0.402                                     | 0.564                                     | 0.717                                     |
|         | 10            |           | 0.292                                     | 0.4                                       | 0.55                                      | 0.708                                     |
|         | 15            |           | 0.292                                     | 0.396                                     | 0.548                                     | 0.69                                      |
|         | 20            |           | 0.257                                     | 0.389                                     | 0.53                                      | 0.681                                     |
|         | 25            |           | 0.251                                     | 0.384                                     | 0.505                                     | 0.68                                      |
| N3      | 0             |           | 0.295                                     | 0.401                                     | 0.559                                     | 0.746                                     |
|         | 5             |           | 0.288                                     | 0.398                                     | 0.557                                     | 0.72                                      |
|         | 10            |           | 0.277                                     | 0.392                                     | 0.555                                     | 0.712                                     |
|         | 15            |           | 0.27                                      | 0.391                                     | 0.555                                     | 0.708                                     |
|         | 20            |           | 0.264                                     | 0.387                                     | 0.538                                     | 0.696                                     |
|         | 25            |           | 0.25                                      | 0.382                                     | 0.521                                     | 0.687                                     |
| N4      | 0             |           | 0.281                                     | 0.398                                     | 0.558                                     | 0.746                                     |
|         | 5             |           | 0.278                                     | 0.39                                      | 0.554                                     | 0.741                                     |
|         | 10            |           | 0.277                                     | 0.388                                     | 0.55                                      | 0.72                                      |
|         | 15            |           | 0.275                                     | 0.386                                     | 0.538                                     | 0.707                                     |
|         | 20            |           | 0.266                                     | 0.382                                     | 0.535                                     | 0.698                                     |
|         | 25            |           | 0.263                                     | 0.38                                      | 0.508                                     | 0.683                                     |
| N5      | 0             |           | 0.296                                     | 0.403                                     | 0.566                                     | 0.747                                     |
|         | 5             |           | 0.27                                      | 0.402                                     | 0.556                                     | 0.742                                     |
|         | 10            |           | 0.267                                     | 0.399                                     | 0.554                                     | 0.736                                     |
|         | 15            |           | 0.265                                     | 0.399                                     | 0.534                                     | 0.726                                     |
|         | 20            |           | 0.264                                     | 0.398                                     | 0.532                                     | 0.689                                     |
|         | 25            |           | 0.258                                     | 0.381                                     | 0.51                                      | 0.688                                     |
| N6      | 0             |           | 0.297                                     | 0.407                                     | 0.558                                     | 0.744                                     |
|         | 5             |           | 0.297                                     | 0.4                                       | 0.547                                     | 0.733                                     |
|         | 10            |           | 0.288                                     | 0.388                                     | 0.54                                      | 0.729                                     |
|         | 15            |           | 0.286                                     | 0.382                                     | 0.531                                     | 0.718                                     |
|         | 20            |           | 0.269                                     | 0.381                                     | 0.523                                     | 0.683                                     |
|         | 25            |           | 0.255                                     | 0.38                                      | 0.518                                     | 0.681                                     |
| N7      | 0             |           | 0.292                                     | 0.404                                     | 0.556                                     | 0.737                                     |
|         | 5             |           | 0.274                                     | 0.4                                       | 0.545                                     | 0.705                                     |
|         | 10            |           | 0.272                                     | 0.393                                     | 0.517                                     | 0.704                                     |
|         | 15            |           | 0.271                                     | 0.391                                     | 0.51                                      | 0.691                                     |
|         | 20            |           | 0.27                                      | 0.389                                     | 0.506                                     | 0.689                                     |
|         | 25            |           | 0.256                                     | 0.386                                     | 0.503                                     | 0.688                                     |
| N8      | 0             |           | 0.294                                     | 0.41                                      | 0.564                                     | 0.741                                     |
|         | 5             |           | 0.292                                     | 0.402                                     | 0.546                                     | 0.731                                     |
|         | 10            |           | 0.291                                     | 0.401                                     | 0.524                                     | 0.716                                     |
|         | 15            |           | 0.287                                     | 0.395                                     | 0.52                                      | 0.712                                     |
|         | 20            |           | 0.281                                     | 0.388                                     | 0.507                                     | 0.705                                     |
|         | 25            |           | 0.273                                     | 0.388                                     | 0.504                                     | 0.68                                      |
| N9      | 0             |           | 0.294                                     | 0.406                                     | 0.565                                     | 0.728                                     |
|         | 5             |           | 0.289                                     | 0.399                                     | 0.56                                      | 0.721                                     |
|         | 10            |           | 0.261                                     | 0.386                                     | 0.537                                     | 0.719                                     |
|         | 15            |           | 0.257                                     | 0.384                                     | 0.513                                     | 0.704                                     |
|         | 20            |           | 0.257                                     | 0.383                                     | 0.506                                     | 0.687                                     |
|         | 25            |           | 0.257                                     | 0.382                                     | 0.503                                     | 0.687                                     |
| N10     | 0             |           | 0.295                                     | 0.409                                     | 0.56                                      | 0.73                                      |
|         | 5             |           | 0.284                                     | 0.404                                     | 0.556                                     | 0.714                                     |
|         | 10            |           | 0.277                                     | 0.395                                     | 0.546                                     | 0.702                                     |
|         | 15            |           | 0.257                                     | 0.393                                     | 0.544                                     | 0.7                                       |
|         | 20            |           | 0.256                                     | 0.392                                     | 0.531                                     | 0.697                                     |
|         | 25            |           | 0.25                                      | 0.381                                     | 0.501                                     | 0.689                                     |
| N11     | 0             |           | 0.286                                     | 0.404                                     | 0.555                                     | 0.73                                      |
|         | 5             |           | 0.28                                      | 0.404                                     | 0.55                                      | 0.718                                     |
|         | 10            |           | 0.274                                     | 0.401                                     | 0.535                                     | 0.711                                     |
|         | 15            |           | 0.271                                     | 0.396                                     | 0.512                                     | 0.708                                     |
|         | 20            |           | 0.269                                     | 0.392                                     | 0.509                                     | 0.694                                     |
|         | 25            |           | 0.256                                     | 0.381                                     | 0.507                                     | 0.687                                     |
| N12     | 0             |           | 0.297                                     | 0.399                                     | 0.558                                     | 0.741                                     |
|         | 5             |           | 0.287                                     | 0.399                                     | 0.558                                     | 0.727                                     |
|         | 10            |           | 0.266                                     | 0.398                                     | 0.531                                     | 0.722                                     |
|         | 15            |           | 0.262                                     | 0.397                                     | 0.521                                     | 0.7                                       |
|         | 20            |           | 0.261                                     | 0.39                                      | 0.52                                      | 0.693                                     |
|         | 25            |           | 0.256                                     | 0.387                                     | 0.517                                     | 0.682                                     |

**Table 26.** Table shows the  $GS^3$  scores obtained by aligning the original synthetic network with its noisy versions when adding nodes for all the networks. Table shows that the alignment quality is constant.

| Network | Altered works | Net- | $GS^3$ on 1 coloured version | $GS^3$ on 2 coloured version | $GS^3$ on 3 coloured version | $GS^3$ on 4 coloured version |
|---------|---------------|------|------------------------------|------------------------------|------------------------------|------------------------------|
| N1      | 0             |      | 1                            | 1                            | 1                            | 1                            |
|         | 5             |      | 1                            | 1                            | 1                            | 1                            |
|         | 10            |      | 1                            | 1                            | 1                            | 1                            |
|         | 15            |      | 1                            | 1                            | 1                            | 1                            |
|         | 20            |      | 1                            | 1                            | 1                            | 1                            |
|         | 25            |      | 1                            | 1                            | 1                            | 1                            |
| N2      | 0             |      | 1                            | 1                            | 1                            | 1                            |
|         | 5             |      | 1                            | 1                            | 1                            | 1                            |
|         | 10            |      | 1                            | 1                            | 1                            | 1                            |
|         | 15            |      | 1                            | 1                            | 1                            | 1                            |
|         | 20            |      | 1                            | 1                            | 1                            | 1                            |
|         | 25            |      | 1                            | 1                            | 1                            | 1                            |
| N3      | 0             |      | 1                            | 1                            | 1                            | 1                            |
|         | 5             |      | 1                            | 1                            | 1                            | 1                            |
|         | 10            |      | 1                            | 1                            | 1                            | 1                            |
|         | 15            |      | 1                            | 1                            | 1                            | 1                            |
|         | 20            |      | 1                            | 1                            | 1                            | 1                            |
|         | 25            |      | 1                            | 1                            | 1                            | 1                            |
| N4      | 0             |      | 1                            | 1                            | 1                            | 1                            |
|         | 5             |      | 1                            | 1                            | 1                            | 1                            |
|         | 10            |      | 1                            | 1                            | 1                            | 1                            |
|         | 15            |      | 1                            | 1                            | 1                            | 1                            |
|         | 20            |      | 1                            | 1                            | 1                            | 1                            |
|         | 25            |      | 1                            | 1                            | 1                            | 1                            |
| N5      | 0             |      | 1                            | 1                            | 1                            | 1                            |
|         | 5             |      | 1                            | 1                            | 1                            | 1                            |
|         | 10            |      | 1                            | 1                            | 1                            | 1                            |
|         | 15            |      | 1                            | 1                            | 1                            | 1                            |
|         | 20            |      | 1                            | 1                            | 1                            | 1                            |
|         | 25            |      | 1                            | 1                            | 1                            | 1                            |
| N6      | 0             |      | 1                            | 1                            | 1                            | 1                            |
|         | 5             |      | 1                            | 1                            | 1                            | 1                            |
|         | 10            |      | 1                            | 1                            | 1                            | 1                            |
|         | 15            |      | 1                            | 1                            | 1                            | 1                            |
|         | 20            |      | 1                            | 1                            | 1                            | 1                            |
|         | 25            |      | 1                            | 1                            | 1                            | 1                            |
| N7      | 0             |      | 1                            | 1                            | 1                            | 1                            |
|         | 5             |      | 1                            | 1                            | 1                            | 1                            |
|         | 10            |      | 1                            | 1                            | 1                            | 1                            |
|         | 15            |      | 1                            | 1                            | 1                            | 1                            |
|         | 20            |      | 1                            | 1                            | 1                            | 1                            |
|         | 25            |      | 1                            | 1                            | 1                            | 1                            |
| N8      | 0             |      | 1                            | 1                            | 1                            | 1                            |
|         | 5             |      | 1                            | 1                            | 1                            | 1                            |
|         | 10            |      | 1                            | 1                            | 1                            | 1                            |
|         | 15            |      | 1                            | 1                            | 1                            | 1                            |
|         | 20            |      | 1                            | 1                            | 1                            | 1                            |
|         | 25            |      | 1                            | 1                            | 1                            | 1                            |
| N9      | 0             |      | 1                            | 1                            | 1                            | 1                            |
|         | 5             |      | 1                            | 1                            | 1                            | 1                            |
|         | 10            |      | 1                            | 1                            | 1                            | 1                            |
|         | 15            |      | 1                            | 1                            | 1                            | 1                            |
|         | 20            |      | 1                            | 1                            | 1                            | 1                            |
|         | 25            |      | 1                            | 1                            | 1                            | 1                            |
| N10     | 0             |      | 1                            | 1                            | 1                            | 1                            |
|         | 5             |      | 1                            | 1                            | 1                            | 1                            |
|         | 10            |      | 1                            | 1                            | 1                            | 1                            |
|         | 15            |      | 1                            | 1                            | 1                            | 1                            |
|         | 20            |      | 1                            | 1                            | 1                            | 1                            |
|         | 25            |      | 1                            | 1                            | 1                            | 1                            |
| N11     | 0             |      | 1                            | 1                            | 1                            | 1                            |
|         | 5             |      | 1                            | 1                            | 1                            | 1                            |
|         | 10            |      | 1                            | 1                            | 1                            | 1                            |
|         | 15            |      | 1                            | 1                            | 1                            | 1                            |
|         | 20            |      | 1                            | 1                            | 1                            | 1                            |
|         | 25            |      | 1                            | 1                            | 1                            | 1                            |
| N12     | 0             |      | 1                            | 1                            | 1                            | 1                            |
|         | 5             |      | 1                            | 1                            | 1                            | 1                            |
|         | 10            |      | 1                            | 1                            | 1                            | 1                            |
|         | 15            |      | 1                            | 1                            | 1                            | 1                            |
|         | 20            |      | 1                            | 1                            | 1                            | 1                            |
|         | 25            |      | 1                            | 1                            | 1                            | 1                            |

**Table 27.** The table shows the NCV scores obtained by aligning the original synthetic network with its noisy versions when adding nodes for all the networks. Table shows a significant improvement of the quality of the alignments when considering networks with many colours. The improvement is also stable for all the networks.

| Network | Altered works | Net-works | NCV on 1 coloured version | NCV on 2 coloured version | NCV on 3 coloured version | NCV on 4 coloured version |
|---------|---------------|-----------|---------------------------|---------------------------|---------------------------|---------------------------|
| N1      | 0             |           | 0.079                     | 0.167                     | 0.36                      | 0.557                     |
|         | 5             |           | 0.078                     | 0.166                     | 0.356                     | 0.536                     |
|         | 10            |           | 0.077                     | 0.164                     | 0.356                     | 0.523                     |
|         | 15            |           | 0.075                     | 0.162                     | 0.352                     | 0.497                     |
|         | 20            |           | 0.071                     | 0.158                     | 0.341                     | 0.471                     |
|         | 25            |           | 0.066                     | 0.156                     | 0.335                     | 0.466                     |
| N2      | 0             |           | 0.089                     | 0.162                     | 0.359                     | 0.517                     |
|         | 5             |           | 0.087                     | 0.162                     | 0.355                     | 0.514                     |
|         | 10            |           | 0.085                     | 0.16                      | 0.35                      | 0.501                     |
|         | 15            |           | 0.085                     | 0.157                     | 0.338                     | 0.476                     |
|         | 20            |           | 0.066                     | 0.151                     | 0.338                     | 0.464                     |
|         | 25            |           | 0.063                     | 0.147                     | 0.326                     | 0.462                     |
| N3      | 0             |           | 0.087                     | 0.161                     | 0.355                     | 0.557                     |
|         | 5             |           | 0.083                     | 0.158                     | 0.342                     | 0.518                     |
|         | 10            |           | 0.077                     | 0.154                     | 0.341                     | 0.507                     |
|         | 15            |           | 0.073                     | 0.153                     | 0.338                     | 0.501                     |
|         | 20            |           | 0.07                      | 0.15                      | 0.336                     | 0.484                     |
|         | 25            |           | 0.062                     | 0.146                     | 0.332                     | 0.472                     |
| N4      | 0             |           | 0.079                     | 0.158                     | 0.36                      | 0.557                     |
|         | 5             |           | 0.077                     | 0.152                     | 0.36                      | 0.549                     |
|         | 10            |           | 0.077                     | 0.151                     | 0.353                     | 0.518                     |
|         | 15            |           | 0.076                     | 0.149                     | 0.339                     | 0.5                       |
|         | 20            |           | 0.071                     | 0.146                     | 0.338                     | 0.487                     |
|         | 25            |           | 0.069                     | 0.144                     | 0.336                     | 0.466                     |
| N5      | 0             |           | 0.088                     | 0.162                     | 0.358                     | 0.558                     |
|         | 5             |           | 0.073                     | 0.162                     | 0.352                     | 0.551                     |
|         | 10            |           | 0.071                     | 0.159                     | 0.342                     | 0.542                     |
|         | 15            |           | 0.07                      | 0.159                     | 0.342                     | 0.527                     |
|         | 20            |           | 0.07                      | 0.158                     | 0.333                     | 0.475                     |
|         | 25            |           | 0.067                     | 0.145                     | 0.333                     | 0.473                     |
| N6      | 0             |           | 0.088                     | 0.166                     | 0.361                     | 0.554                     |
|         | 5             |           | 0.088                     | 0.16                      | 0.36                      | 0.537                     |
|         | 10            |           | 0.083                     | 0.151                     | 0.348                     | 0.531                     |
|         | 15            |           | 0.082                     | 0.146                     | 0.347                     | 0.516                     |
|         | 20            |           | 0.072                     | 0.145                     | 0.346                     | 0.466                     |
|         | 25            |           | 0.065                     | 0.144                     | 0.327                     | 0.464                     |
| N7      | 0             |           | 0.085                     | 0.163                     | 0.358                     | 0.543                     |
|         | 5             |           | 0.075                     | 0.16                      | 0.345                     | 0.497                     |
|         | 10            |           | 0.074                     | 0.154                     | 0.338                     | 0.496                     |
|         | 15            |           | 0.073                     | 0.153                     | 0.338                     | 0.477                     |
|         | 20            |           | 0.073                     | 0.151                     | 0.336                     | 0.475                     |
|         | 25            |           | 0.066                     | 0.149                     | 0.333                     | 0.473                     |
| N8      | 0             |           | 0.086                     | 0.168                     | 0.36                      | 0.549                     |
|         | 5             |           | 0.085                     | 0.162                     | 0.349                     | 0.534                     |
|         | 10            |           | 0.085                     | 0.161                     | 0.342                     | 0.513                     |
|         | 15            |           | 0.082                     | 0.156                     | 0.34                      | 0.507                     |
|         | 20            |           | 0.079                     | 0.151                     | 0.334                     | 0.497                     |
|         | 25            |           | 0.075                     | 0.151                     | 0.326                     | 0.462                     |
| N9      | 0             |           | 0.086                     | 0.165                     | 0.361                     | 0.53                      |
|         | 5             |           | 0.084                     | 0.159                     | 0.361                     | 0.52                      |
|         | 10            |           | 0.068                     | 0.149                     | 0.35                      | 0.517                     |
|         | 15            |           | 0.066                     | 0.147                     | 0.35                      | 0.496                     |
|         | 20            |           | 0.066                     | 0.147                     | 0.342                     | 0.472                     |
|         | 25            |           | 0.066                     | 0.146                     | 0.326                     | 0.472                     |
| N10     | 0             |           | 0.087                     | 0.167                     | 0.358                     | 0.533                     |
|         | 5             |           | 0.081                     | 0.163                     | 0.354                     | 0.51                      |
|         | 10            |           | 0.077                     | 0.156                     | 0.353                     | 0.493                     |
|         | 15            |           | 0.066                     | 0.154                     | 0.353                     | 0.49                      |
|         | 20            |           | 0.066                     | 0.154                     | 0.341                     | 0.486                     |
|         | 25            |           | 0.062                     | 0.145                     | 0.336                     | 0.475                     |
| N11     | 0             |           | 0.082                     | 0.163                     | 0.358                     | 0.533                     |
|         | 5             |           | 0.078                     | 0.163                     | 0.345                     | 0.516                     |
|         | 10            |           | 0.075                     | 0.161                     | 0.345                     | 0.506                     |
|         | 15            |           | 0.073                     | 0.157                     | 0.335                     | 0.501                     |
|         | 20            |           | 0.072                     | 0.154                     | 0.333                     | 0.482                     |
|         | 25            |           | 0.066                     | 0.145                     | 0.325                     | 0.472                     |
| N12     | 0             |           | 0.088                     | 0.159                     | 0.352                     | 0.549                     |
|         | 5             |           | 0.082                     | 0.159                     | 0.349                     | 0.529                     |
|         | 10            |           | 0.071                     | 0.158                     | 0.348                     | 0.521                     |
|         | 15            |           | 0.069                     | 0.158                     | 0.338                     | 0.49                      |
|         | 20            |           | 0.068                     | 0.152                     | 0.336                     | 0.48                      |
|         | 25            |           | 0.066                     | 0.15                      | 0.326                     | 0.465                     |



**Table 28.** P-NC scores obtained by aligning the original synthetic network with its noisy versions for all the networks. Networks are obtained by adding nodes. Table shows that the alignment quality is constant.

| Network | Altered works | Net- | P-NC on 1 coloured version | P-NC on 2 coloured version | P-NC on 3 coloured version | P-NC on 4 coloured version |
|---------|---------------|------|----------------------------|----------------------------|----------------------------|----------------------------|
| N1      | 0             |      | 1                          | 1                          | 1                          | 1                          |
|         | 5             |      | 1                          | 1                          | 1                          | 1                          |
|         | 10            |      | 1                          | 1                          | 1                          | 1                          |
|         | 15            |      | 1                          | 1                          | 1                          | 1                          |
|         | 20            |      | 1                          | 1                          | 1                          | 1                          |
|         | 25            |      | 1                          | 1                          | 1                          | 1                          |
| N2      | 0             |      | 1                          | 1                          | 1                          | 1                          |
|         | 5             |      | 1                          | 1                          | 1                          | 1                          |
|         | 10            |      | 1                          | 1                          | 1                          | 1                          |
|         | 15            |      | 1                          | 1                          | 1                          | 1                          |
|         | 20            |      | 1                          | 1                          | 1                          | 1                          |
|         | 25            |      | 1                          | 1                          | 1                          | 1                          |
| N3      | 0             |      | 1                          | 1                          | 1                          | 1                          |
|         | 5             |      | 1                          | 1                          | 1                          | 1                          |
|         | 10            |      | 1                          | 1                          | 1                          | 1                          |
|         | 15            |      | 1                          | 1                          | 1                          | 1                          |
|         | 20            |      | 1                          | 1                          | 1                          | 1                          |
|         | 25            |      | 1                          | 1                          | 1                          | 1                          |
| N4      | 0             |      | 1                          | 1                          | 1                          | 1                          |
|         | 5             |      | 1                          | 1                          | 1                          | 1                          |
|         | 10            |      | 1                          | 1                          | 1                          | 1                          |
|         | 15            |      | 1                          | 1                          | 1                          | 1                          |
|         | 20            |      | 1                          | 1                          | 1                          | 1                          |
|         | 25            |      | 1                          | 1                          | 1                          | 1                          |
| N5      | 0             |      | 1                          | 1                          | 1                          | 1                          |
|         | 5             |      | 1                          | 1                          | 1                          | 1                          |
|         | 10            |      | 1                          | 1                          | 1                          | 1                          |
|         | 15            |      | 1                          | 1                          | 1                          | 1                          |
|         | 20            |      | 1                          | 1                          | 1                          | 1                          |
|         | 25            |      | 1                          | 1                          | 1                          | 1                          |
| N6      | 0             |      | 1                          | 1                          | 1                          | 1                          |
|         | 5             |      | 1                          | 1                          | 1                          | 1                          |
|         | 10            |      | 1                          | 1                          | 1                          | 1                          |
|         | 15            |      | 1                          | 1                          | 1                          | 1                          |
|         | 20            |      | 1                          | 1                          | 1                          | 1                          |
|         | 25            |      | 1                          | 1                          | 1                          | 1                          |
| N7      | 0             |      | 1                          | 1                          | 1                          | 1                          |
|         | 5             |      | 1                          | 1                          | 1                          | 1                          |
|         | 10            |      | 1                          | 1                          | 1                          | 1                          |
|         | 15            |      | 1                          | 1                          | 1                          | 1                          |
|         | 20            |      | 1                          | 1                          | 1                          | 1                          |
|         | 25            |      | 1                          | 1                          | 1                          | 1                          |
| N8      | 0             |      | 1                          | 1                          | 1                          | 1                          |
|         | 5             |      | 1                          | 1                          | 1                          | 1                          |
|         | 10            |      | 1                          | 1                          | 1                          | 1                          |
|         | 15            |      | 1                          | 1                          | 1                          | 1                          |
|         | 20            |      | 1                          | 1                          | 1                          | 1                          |
|         | 25            |      | 1                          | 1                          | 1                          | 1                          |
| N9      | 0             |      | 1                          | 1                          | 1                          | 1                          |
|         | 5             |      | 1                          | 1                          | 1                          | 1                          |
|         | 10            |      | 1                          | 1                          | 1                          | 1                          |
|         | 15            |      | 1                          | 1                          | 1                          | 1                          |
|         | 20            |      | 1                          | 1                          | 1                          | 1                          |
|         | 25            |      | 1                          | 1                          | 1                          | 1                          |
| N10     | 0             |      | 1                          | 1                          | 1                          | 1                          |
|         | 5             |      | 1                          | 1                          | 1                          | 1                          |
|         | 10            |      | 1                          | 1                          | 1                          | 1                          |
|         | 15            |      | 1                          | 1                          | 1                          | 1                          |
|         | 20            |      | 1                          | 1                          | 1                          | 1                          |
|         | 25            |      | 1                          | 1                          | 1                          | 1                          |
| N11     | 0             |      | 1                          | 1                          | 1                          | 1                          |
|         | 5             |      | 1                          | 1                          | 1                          | 1                          |
|         | 10            |      | 1                          | 1                          | 1                          | 1                          |
|         | 15            |      | 1                          | 1                          | 1                          | 1                          |
|         | 20            |      | 1                          | 1                          | 1                          | 1                          |
|         | 25            |      | 1                          | 1                          | 1                          | 1                          |
| N12     | 0             |      | 1                          | 1                          | 1                          | 1                          |
|         | 5             |      | 1                          | 1                          | 1                          | 1                          |
|         | 10            |      | 1                          | 1                          | 1                          | 1                          |
|         | 15            |      | 1                          | 1                          | 1                          | 1                          |
|         | 20            |      | 1                          | 1                          | 1                          | 1                          |
|         | 25            |      | 1                          | 1                          | 1                          | 1                          |

**Table 29.** The table shows the R-NC scores obtained by aligning the original synthetic network with its noisy versions when adding nodes for all the networks. Table shows a significant improvement of the quality of the alignments when considering networks with many colours. The improvement is also stable for all the networks.

| Network | Altered works | Net-works | R-NC on 1 coloured version | R-NC on 2 coloured version | R-NC on 3 coloured version | R-NC on 4 coloured version |
|---------|---------------|-----------|----------------------------|----------------------------|----------------------------|----------------------------|
| N1      | 0             |           | 0.084                      | 0.167                      | 0.101                      | 0.539                      |
|         | 5             |           | 0.084                      | 0.162                      | 0.097                      | 0.523                      |
|         | 10            |           | 0.075                      | 0.154                      | 0.096                      | 0.508                      |
|         | 15            |           | 0.066                      | 0.151                      | 0.093                      | 0.497                      |
|         | 20            |           | 0.065                      | 0.151                      | 0.091                      | 0.491                      |
|         | 25            |           | 0.064                      | 0.149                      | 0.073                      | 0.491                      |
| N2      | 0             |           | 0.083                      | 0.166                      | 0.102                      | 0.552                      |
|         | 5             |           | 0.08                       | 0.165                      | 0.101                      | 0.542                      |
|         | 10            |           | 0.078                      | 0.160                      | 0.092                      | 0.511                      |
|         | 15            |           | 0.076                      | 0.154                      | 0.090                      | 0.504                      |
|         | 20            |           | 0.07                       | 0.151                      | 0.079                      | 0.493                      |
|         | 25            |           | 0.069                      | 0.148                      | 0.065                      | 0.484                      |
| N3      | 0             |           | 0.088                      | 0.166                      | 0.097                      | 0.534                      |
|         | 5             |           | 0.088                      | 0.163                      | 0.096                      | 0.529                      |
|         | 10            |           | 0.085                      | 0.160                      | 0.095                      | 0.526                      |
|         | 15            |           | 0.079                      | 0.159                      | 0.095                      | 0.52                       |
|         | 20            |           | 0.075                      | 0.158                      | 0.084                      | 0.498                      |
|         | 25            |           | 0.062                      | 0.154                      | 0.073                      | 0.479                      |
| N4      | 0             |           | 0.086                      | 0.166                      | 0.097                      | 0.557                      |
|         | 5             |           | 0.079                      | 0.154                      | 0.094                      | 0.533                      |
|         | 10            |           | 0.071                      | 0.151                      | 0.092                      | 0.516                      |
|         | 15            |           | 0.069                      | 0.149                      | 0.084                      | 0.5                        |
|         | 20            |           | 0.068                      | 0.148                      | 0.082                      | 0.496                      |
|         | 25            |           | 0.067                      | 0.145                      | 0.067                      | 0.477                      |
| N5      | 0             |           | 0.085                      | 0.168                      | 0.102                      | 0.555                      |
|         | 5             |           | 0.083                      | 0.165                      | 0.095                      | 0.536                      |
|         | 10            |           | 0.082                      | 0.162                      | 0.094                      | 0.527                      |
|         | 15            |           | 0.081                      | 0.150                      | 0.081                      | 0.507                      |
|         | 20            |           | 0.074                      | 0.149                      | 0.080                      | 0.498                      |
|         | 25            |           | 0.064                      | 0.149                      | 0.068                      | 0.472                      |
| N6      | 0             |           | 0.084                      | 0.168                      | 0.097                      | 0.542                      |
|         | 5             |           | 0.08                       | 0.167                      | 0.089                      | 0.523                      |
|         | 10            |           | 0.076                      | 0.162                      | 0.085                      | 0.518                      |
|         | 15            |           | 0.075                      | 0.154                      | 0.080                      | 0.507                      |
|         | 20            |           | 0.073                      | 0.147                      | 0.075                      | 0.482                      |
|         | 25            |           | 0.071                      | 0.147                      | 0.072                      | 0.469                      |
| N7      | 0             |           | 0.088                      | 0.166                      | 0.095                      | 0.54                       |
|         | 5             |           | 0.081                      | 0.165                      | 0.088                      | 0.531                      |
|         | 10            |           | 0.077                      | 0.161                      | 0.071                      | 0.517                      |
|         | 15            |           | 0.072                      | 0.160                      | 0.068                      | 0.506                      |
|         | 20            |           | 0.071                      | 0.152                      | 0.066                      | 0.473                      |
|         | 25            |           | 0.068                      | 0.146                      | 0.064                      | 0.465                      |
| N8      | 0             |           | 0.084                      | 0.167                      | 0.101                      | 0.552                      |
|         | 5             |           | 0.082                      | 0.164                      | 0.089                      | 0.534                      |
|         | 10            |           | 0.08                       | 0.154                      | 0.076                      | 0.531                      |
|         | 15            |           | 0.077                      | 0.150                      | 0.073                      | 0.51                       |
|         | 20            |           | 0.075                      | 0.148                      | 0.066                      | 0.49                       |
|         | 25            |           | 0.062                      | 0.145                      | 0.065                      | 0.482                      |
| N9      | 0             |           | 0.088                      | 0.159                      | 0.102                      | 0.554                      |
|         | 5             |           | 0.08                       | 0.154                      | 0.099                      | 0.513                      |
|         | 10            |           | 0.075                      | 0.154                      | 0.083                      | 0.501                      |
|         | 15            |           | 0.075                      | 0.153                      | 0.069                      | 0.489                      |
|         | 20            |           | 0.063                      | 0.151                      | 0.066                      | 0.486                      |
|         | 25            |           | 0.063                      | 0.144                      | 0.064                      | 0.465                      |
| N10     | 0             |           | 0.089                      | 0.167                      | 0.099                      | 0.546                      |
|         | 5             |           | 0.088                      | 0.159                      | 0.095                      | 0.54                       |
|         | 10            |           | 0.081                      | 0.154                      | 0.089                      | 0.49                       |
|         | 15            |           | 0.078                      | 0.154                      | 0.088                      | 0.486                      |
|         | 20            |           | 0.077                      | 0.150                      | 0.080                      | 0.48                       |
|         | 25            |           | 0.072                      | 0.144                      | 0.063                      | 0.471                      |
| N11     | 0             |           | 0.082                      | 0.168                      | 0.095                      | 0.543                      |
|         | 5             |           | 0.08                       | 0.166                      | 0.092                      | 0.531                      |
|         | 10            |           | 0.077                      | 0.162                      | 0.082                      | 0.526                      |
|         | 15            |           | 0.076                      | 0.154                      | 0.069                      | 0.521                      |
|         | 20            |           | 0.076                      | 0.153                      | 0.067                      | 0.514                      |
|         | 25            |           | 0.064                      | 0.150                      | 0.066                      | 0.484                      |
| N12     | 0             |           | 0.08                       | 0.164                      | 0.097                      | 0.554                      |
|         | 5             |           | 0.072                      | 0.163                      | 0.097                      | 0.546                      |
|         | 10            |           | 0.072                      | 0.155                      | 0.080                      | 0.546                      |
|         | 15            |           | 0.069                      | 0.154                      | 0.073                      | 0.521                      |
|         | 20            |           | 0.067                      | 0.149                      | 0.073                      | 0.466                      |
|         | 25            |           | 0.065                      | 0.144                      | 0.071                      | 0.464                      |

**Table 30.** The table shows the F-NC scores obtained by aligning the original synthetic network with its noisy versions when adding nodes for all the networks. Table shows a significant improvement of the quality of the alignments when considering networks with many colours. The improvement is also stable for all the networks.

| Network | Altered works | Net-works | F-NC on 1 coloured version | F-NC on 2 coloured version | F-NC on 3 coloured version | F-NC on 4 coloured version |
|---------|---------------|-----------|----------------------------|----------------------------|----------------------------|----------------------------|
| N1      | 0             |           | 0.289                      | 0.409                      | 0.318                      | 0.734                      |
|         | 5             |           | 0.289                      | 0.402                      | 0.312                      | 0.723                      |
|         | 10            |           | 0.274                      | 0.393                      | 0.31                       | 0.713                      |
|         | 15            |           | 0.256                      | 0.389                      | 0.305                      | 0.705                      |
|         | 20            |           | 0.255                      | 0.388                      | 0.301                      | 0.701                      |
|         | 25            |           | 0.253                      | 0.386                      | 0.27                       | 0.701                      |
| N2      | 0             |           | 0.288                      | 0.407                      | 0.32                       | 0.743                      |
|         | 5             |           | 0.282                      | 0.406                      | 0.318                      | 0.736                      |
|         | 10            |           | 0.28                       | 0.4                        | 0.303                      | 0.715                      |
|         | 15            |           | 0.276                      | 0.393                      | 0.3                        | 0.71                       |
|         | 20            |           | 0.264                      | 0.388                      | 0.281                      | 0.702                      |
|         | 25            |           | 0.262                      | 0.385                      | 0.255                      | 0.696                      |
| N3      | 0             |           | 0.297                      | 0.408                      | 0.312                      | 0.731                      |
|         | 5             |           | 0.296                      | 0.404                      | 0.31                       | 0.727                      |
|         | 10            |           | 0.292                      | 0.4                        | 0.308                      | 0.725                      |
|         | 15            |           | 0.281                      | 0.399                      | 0.308                      | 0.721                      |
|         | 20            |           | 0.274                      | 0.397                      | 0.289                      | 0.706                      |
|         | 25            |           | 0.25                       | 0.392                      | 0.271                      | 0.692                      |
| N4      | 0             |           | 0.293                      | 0.408                      | 0.311                      | 0.746                      |
|         | 5             |           | 0.281                      | 0.393                      | 0.307                      | 0.73                       |
|         | 10            |           | 0.267                      | 0.388                      | 0.303                      | 0.718                      |
|         | 15            |           | 0.263                      | 0.386                      | 0.289                      | 0.707                      |
|         | 20            |           | 0.26                       | 0.385                      | 0.286                      | 0.704                      |
|         | 25            |           | 0.259                      | 0.381                      | 0.258                      | 0.691                      |
| N5      | 0             |           | 0.291                      | 0.41                       | 0.32                       | 0.745                      |
|         | 5             |           | 0.288                      | 0.406                      | 0.309                      | 0.732                      |
|         | 10            |           | 0.287                      | 0.403                      | 0.307                      | 0.726                      |
|         | 15            |           | 0.285                      | 0.387                      | 0.285                      | 0.712                      |
|         | 20            |           | 0.272                      | 0.386                      | 0.283                      | 0.706                      |
|         | 25            |           | 0.252                      | 0.386                      | 0.26                       | 0.687                      |
| N6      | 0             |           | 0.289                      | 0.41                       | 0.311                      | 0.736                      |
|         | 5             |           | 0.282                      | 0.409                      | 0.299                      | 0.723                      |
|         | 10            |           | 0.275                      | 0.402                      | 0.292                      | 0.72                       |
|         | 15            |           | 0.274                      | 0.392                      | 0.282                      | 0.712                      |
|         | 20            |           | 0.271                      | 0.384                      | 0.274                      | 0.694                      |
|         | 25            |           | 0.266                      | 0.383                      | 0.268                      | 0.685                      |
| N7      | 0             |           | 0.296                      | 0.407                      | 0.309                      | 0.735                      |
|         | 5             |           | 0.285                      | 0.406                      | 0.297                      | 0.729                      |
|         | 10            |           | 0.278                      | 0.401                      | 0.267                      | 0.719                      |
|         | 15            |           | 0.268                      | 0.4                        | 0.26                       | 0.711                      |
|         | 20            |           | 0.266                      | 0.39                       | 0.256                      | 0.688                      |
|         | 25            |           | 0.26                       | 0.382                      | 0.253                      | 0.682                      |
| N8      | 0             |           | 0.289                      | 0.409                      | 0.318                      | 0.743                      |
|         | 5             |           | 0.286                      | 0.405                      | 0.298                      | 0.731                      |
|         | 10            |           | 0.282                      | 0.393                      | 0.275                      | 0.729                      |
|         | 15            |           | 0.277                      | 0.387                      | 0.27                       | 0.714                      |
|         | 20            |           | 0.273                      | 0.385                      | 0.257                      | 0.7                        |
|         | 25            |           | 0.25                       | 0.381                      | 0.254                      | 0.694                      |
| N9      | 0             |           | 0.296                      | 0.399                      | 0.319                      | 0.744                      |
|         | 5             |           | 0.283                      | 0.393                      | 0.314                      | 0.716                      |
|         | 10            |           | 0.273                      | 0.392                      | 0.288                      | 0.708                      |
|         | 15            |           | 0.273                      | 0.391                      | 0.263                      | 0.699                      |
|         | 20            |           | 0.251                      | 0.389                      | 0.256                      | 0.697                      |
|         | 25            |           | 0.251                      | 0.38                       | 0.253                      | 0.682                      |
| N10     | 0             |           | 0.299                      | 0.409                      | 0.314                      | 0.739                      |
|         | 5             |           | 0.296                      | 0.399                      | 0.309                      | 0.735                      |
|         | 10            |           | 0.285                      | 0.393                      | 0.298                      | 0.7                        |
|         | 15            |           | 0.28                       | 0.392                      | 0.296                      | 0.697                      |
|         | 20            |           | 0.277                      | 0.387                      | 0.282                      | 0.693                      |
|         | 25            |           | 0.269                      | 0.38                       | 0.251                      | 0.686                      |
| N11     | 0             |           | 0.287                      | 0.41                       | 0.308                      | 0.737                      |
|         | 5             |           | 0.282                      | 0.407                      | 0.303                      | 0.729                      |
|         | 10            |           | 0.277                      | 0.403                      | 0.286                      | 0.725                      |
|         | 15            |           | 0.276                      | 0.392                      | 0.262                      | 0.722                      |
|         | 20            |           | 0.275                      | 0.391                      | 0.259                      | 0.717                      |
|         | 25            |           | 0.252                      | 0.387                      | 0.257                      | 0.696                      |
| N12     | 0             |           | 0.282                      | 0.405                      | 0.311                      | 0.744                      |
|         | 5             |           | 0.269                      | 0.404                      | 0.311                      | 0.739                      |
|         | 10            |           | 0.268                      | 0.394                      | 0.282                      | 0.739                      |
|         | 15            |           | 0.263                      | 0.392                      | 0.271                      | 0.722                      |
|         | 20            |           | 0.258                      | 0.386                      | 0.27                       | 0.683                      |
|         | 25            |           | 0.255                      | 0.38                       | 0.267                      | 0.681                      |

**Table 31.** Table summarises the NCV-GS<sup>3</sup> scores obtained by aligning the original Hetionet network with its noisy versions. Altered networks are obtained by adding nodes randomly. Table shows a remarkable trend of improvements when considering networks with many colours for all the networks.

| Network  | Altered Networks | NCV-GS <sup>3</sup> on 1 coloured version | NCV-GS <sup>3</sup> on 2 coloured version | NCV-GS <sup>3</sup> on 3 coloured version | NCV-GS <sup>3</sup> on 4 coloured version |
|----------|------------------|-------------------------------------------|-------------------------------------------|-------------------------------------------|-------------------------------------------|
| Hetionet | 0% of noise      | 0.281                                     | 0.404                                     | 0.56                                      | 0.741                                     |
|          | 5% of noise      | 0.278                                     | 0.4                                       | 0.556                                     | 0.727                                     |
|          | 10% of noise     | 0.277                                     | 0.393                                     | 0.546                                     | 0.722                                     |
|          | 15% of noise     | 0.275                                     | 0.391                                     | 0.544                                     | 0.7                                       |
|          | 20% of noise     | 0.266                                     | 0.389                                     | 0.531                                     | 0.693                                     |
|          | 25% of noise     | 0.263                                     | 0.386                                     | 0.501                                     | 0.682                                     |

**Table 32.** Table summarises the GS<sup>3</sup> scores obtained by aligning the original Hetionet network with its noisy versions when adding nodes. Table shows that the alignment quality is constant.

| Network  | Altered Networks | GS <sup>3</sup> on 1 coloured version | GS <sup>3</sup> on 2 coloured version | GS <sup>3</sup> on 3 coloured version | GS <sup>3</sup> on 4 coloured version |
|----------|------------------|---------------------------------------|---------------------------------------|---------------------------------------|---------------------------------------|
| Hetionet | 0% of noise      | 1                                     | 1                                     | 1                                     | 1                                     |
|          | 5% of noise      | 1                                     | 1                                     | 1                                     | 1                                     |
|          | 10% of noise     | 1                                     | 1                                     | 1                                     | 1                                     |
|          | 15% of noise     | 1                                     | 1                                     | 1                                     | 1                                     |
|          | 20% of noise     | 1                                     | 1                                     | 1                                     | 1                                     |
|          | 25% of noise     | 1                                     | 1                                     | 1                                     | 1                                     |

**Table 33.** The table shows the NCV scores obtained by aligning the original synthetic network with its noisy versions when adding nodes for all the networks. Table shows a significant improvement of the quality of the alignments when considering networks with many colours. The improvement is also stable for all the networks.

| Network  | Altered Networks | NCV on 1 coloured version | NCV on 2 coloured version | NCV on 3 coloured version | NCV on 4 coloured version |
|----------|------------------|---------------------------|---------------------------|---------------------------|---------------------------|
| Hetionet | 0% of noise      | 0.079                     | 0.163                     | 0.358                     | 0.549                     |
|          | 5% of noise      | 0.077                     | 0.16                      | 0.354                     | 0.529                     |
|          | 10% of noise     | 0.077                     | 0.154                     | 0.353                     | 0.521                     |
|          | 15% of noise     | 0.076                     | 0.153                     | 0.353                     | 0.49                      |
|          | 20% of noise     | 0.071                     | 0.151                     | 0.341                     | 0.48                      |
|          | 25% of noise     | 0.069                     | 0.149                     | 0.336                     | 0.465                     |

**Table 34.** Table shows the P-NC scores obtained by aligning the original Hetionet network with its noisy versions. Altered networks presents more nodes. Table shows that the alignment quality is constant.

| Network  | Altered Networks | P-NC on 1 coloured version | P-NC on 2 coloured version | P-NC on 3 coloured version | P-NC on 4 coloured version |
|----------|------------------|----------------------------|----------------------------|----------------------------|----------------------------|
| Hetionet | 0% of noise      | 1                          | 1                          | 1                          | 1                          |
|          | 5% of noise      | 1                          | 1                          | 1                          | 1                          |
|          | 10% of noise     | 1                          | 1                          | 1                          | 1                          |
|          | 15% of noise     | 1                          | 1                          | 1                          | 1                          |
|          | 20% of noise     | 1                          | 1                          | 1                          | 1                          |
|          | 25% of noise     | 1                          | 1                          | 1                          | 1                          |

**Table 35.** The table shows the R-N scores obtained by aligning the original synthetic network with its noisy versions when adding nodes for all the networks. Table shows a significant improvement of the quality of the alignments when considering networks with many colours. The improvement is also stable for all the networks.

| Network  | Altered Networks | R-NC on 1 coloured version | R-NC on 2 coloured version | R-NC on 3 coloured version | R-NC on 4 coloured version |
|----------|------------------|----------------------------|----------------------------|----------------------------|----------------------------|
| Hetionet | 0% of noise      | 0.088                      | 0.168                      | 0.102                      | 0.554                      |
|          | 5% of noise      | 0.088                      | 0.167                      | 0.099                      | 0.546                      |
|          | 10% of noise     | 0.085                      | 0.162                      | 0.083                      | 0.546                      |
|          | 15% of noise     | 0.079                      | 0.154                      | 0.069                      | 0.521                      |
|          | 20% of noise     | 0.075                      | 0.147                      | 0.066                      | 0.466                      |
|          | 25% of noise     | 0.062                      | 0.147                      | 0.064                      | 0.464                      |

**Table 36.** The table shows the F-NC scores obtained by aligning the original synthetic network with its noisy versions when adding nodes for all the networks. Table shows a significant improvement of the quality of the alignments when considering networks with many colours. The improvement is also stable for all the networks.

| Network  | Altered Networks | F-NC on 1 coloured version | F-NC on 2 coloured version | F-NC on 3 coloured version | F-NC on 4 coloured version |
|----------|------------------|----------------------------|----------------------------|----------------------------|----------------------------|
| Hetionet | 0% of noise      | 0.297                      | 0.41                       | 0.319                      | 0.744                      |
|          | 5% of noise      | 0.296                      | 0.409                      | 0.314                      | 0.739                      |
|          | 10% of noise     | 0.292                      | 0.402                      | 0.288                      | 0.739                      |
|          | 15% of noise     | 0.281                      | 0.392                      | 0.263                      | 0.722                      |
|          | 20% of noise     | 0.274                      | 0.384                      | 0.256                      | 0.683                      |
|          | 25% of noise     | 0.25                       | 0.383                      | 0.253                      | 0.681                      |

**Quality of the alignments synthetic heterogeneous networks obtained by aligning each network with its noisy versions built by removing a percentage of nodes randomly.**

Table 37, Table 38, Table 39, Table 40, Table 41, Table 42 report the NCV-GS<sup>3</sup>, GS<sup>3</sup>, NCV, P-NC, R-NC, F-NC measures computed on each module for the four versions of synthetic heterogeneous networks obtained by aligning each network with its noisy versions built by removing a percentage of nodes.

**Table 37.** Table summarises the NCV-GS<sup>3</sup> scores obtained by aligning the original synthetic network with its noisy versions obtained by removing nodes. Table shows a significant improvement of the quality of the alignments when considering networks with many colours. The improvement is also stable for all the considered networks.

| Network | Altered works | Net-works | NCV-GS <sup>3</sup> on 1 coloured version | NCV-GS <sup>3</sup> on 2 coloured version | NCV-GS <sup>3</sup> on 3 coloured version | NCV-GS <sup>3</sup> on 4 coloured version |
|---------|---------------|-----------|-------------------------------------------|-------------------------------------------|-------------------------------------------|-------------------------------------------|
| N1      | 0             |           | 0.339                                     | 0.468                                     | 0.6                                       | 0.817                                     |
|         | 5             |           | 0.338                                     | 0.465                                     | 0.597                                     | 0.789                                     |
|         | 10            |           | 0.333                                     | 0.46                                      | 0.597                                     | 0.78                                      |
|         | 15            |           | 0.321                                     | 0.451                                     | 0.593                                     | 0.758                                     |
|         | 20            |           | 0.317                                     | 0.442                                     | 0.584                                     | 0.756                                     |
|         | 25            |           | 0.311                                     | 0.424                                     | 0.579                                     | 0.753                                     |
| N2      | 0             |           | 0.348                                     | 0.46                                      | 0.599                                     | 0.819                                     |
|         | 5             |           | 0.346                                     | 0.454                                     | 0.596                                     | 0.814                                     |
|         | 10            |           | 0.345                                     | 0.448                                     | 0.592                                     | 0.805                                     |
|         | 15            |           | 0.341                                     | 0.446                                     | 0.581                                     | 0.804                                     |
|         | 20            |           | 0.326                                     | 0.44                                      | 0.581                                     | 0.778                                     |
|         | 25            |           | 0.307                                     | 0.439                                     | 0.571                                     | 0.774                                     |
| N3      | 0             |           | 0.342                                     | 0.466                                     | 0.596                                     | 0.812                                     |
|         | 5             |           | 0.336                                     | 0.465                                     | 0.585                                     | 0.789                                     |
|         | 10            |           | 0.333                                     | 0.461                                     | 0.584                                     | 0.778                                     |
|         | 15            |           | 0.324                                     | 0.452                                     | 0.581                                     | 0.778                                     |
|         | 20            |           | 0.318                                     | 0.449                                     | 0.58                                      | 0.768                                     |
|         | 25            |           | 0.314                                     | 0.434                                     | 0.576                                     | 0.754                                     |
| N4      | 0             |           | 0.347                                     | 0.469                                     | 0.6                                       | 0.807                                     |
|         | 5             |           | 0.321                                     | 0.461                                     | 0.6                                       | 0.806                                     |
|         | 10            |           | 0.314                                     | 0.459                                     | 0.594                                     | 0.79                                      |
|         | 15            |           | 0.311                                     | 0.449                                     | 0.582                                     | 0.786                                     |
|         | 20            |           | 0.31                                      | 0.437                                     | 0.581                                     | 0.772                                     |
|         | 25            |           | 0.302                                     | 0.431                                     | 0.58                                      | 0.762                                     |
| N5      | 0             |           | 0.348                                     | 0.465                                     | 0.598                                     | 0.816                                     |
|         | 5             |           | 0.346                                     | 0.461                                     | 0.593                                     | 0.799                                     |
|         | 10            |           | 0.342                                     | 0.457                                     | 0.585                                     | 0.787                                     |
|         | 15            |           | 0.325                                     | 0.455                                     | 0.585                                     | 0.777                                     |
|         | 20            |           | 0.308                                     | 0.45                                      | 0.577                                     | 0.774                                     |
|         | 25            |           | 0.306                                     | 0.437                                     | 0.577                                     | 0.768                                     |
| N6      | 0             |           | 0.342                                     | 0.461                                     | 0.601                                     | 0.814                                     |
|         | 5             |           | 0.337                                     | 0.458                                     | 0.6                                       | 0.814                                     |
|         | 10            |           | 0.331                                     | 0.448                                     | 0.59                                      | 0.811                                     |
|         | 15            |           | 0.33                                      | 0.444                                     | 0.589                                     | 0.788                                     |
|         | 20            |           | 0.309                                     | 0.442                                     | 0.588                                     | 0.778                                     |
|         | 25            |           | 0.301                                     | 0.429                                     | 0.572                                     | 0.766                                     |
| N7      | 0             |           | 0.349                                     | 0.464                                     | 0.598                                     | 0.812                                     |
|         | 5             |           | 0.349                                     | 0.462                                     | 0.587                                     | 0.798                                     |
|         | 10            |           | 0.342                                     | 0.461                                     | 0.581                                     | 0.79                                      |
|         | 15            |           | 0.34                                      | 0.443                                     | 0.581                                     | 0.79                                      |
|         | 20            |           | 0.316                                     | 0.442                                     | 0.58                                      | 0.787                                     |
|         | 25            |           | 0.309                                     | 0.435                                     | 0.577                                     | 0.765                                     |
| N8      | 0             |           | 0.336                                     | 0.469                                     | 0.6                                       | 0.799                                     |
|         | 5             |           | 0.329                                     | 0.464                                     | 0.591                                     | 0.797                                     |
|         | 10            |           | 0.329                                     | 0.455                                     | 0.585                                     | 0.785                                     |
|         | 15            |           | 0.307                                     | 0.448                                     | 0.583                                     | 0.785                                     |
|         | 20            |           | 0.302                                     | 0.423                                     | 0.578                                     | 0.764                                     |
|         | 25            |           | 0.301                                     | 0.421                                     | 0.571                                     | 0.755                                     |
| N9      | 0             |           | 0.341                                     | 0.468                                     | 0.601                                     | 0.792                                     |
|         | 5             |           | 0.333                                     | 0.454                                     | 0.601                                     | 0.789                                     |
|         | 10            |           | 0.328                                     | 0.453                                     | 0.592                                     | 0.776                                     |
|         | 15            |           | 0.327                                     | 0.446                                     | 0.592                                     | 0.76                                      |
|         | 20            |           | 0.317                                     | 0.436                                     | 0.585                                     | 0.754                                     |
|         | 25            |           | 0.301                                     | 0.43                                      | 0.571                                     | 0.75                                      |
| N10     | 0             |           | 0.346                                     | 0.461                                     | 0.598                                     | 0.815                                     |
|         | 5             |           | 0.33                                      | 0.453                                     | 0.595                                     | 0.814                                     |
|         | 10            |           | 0.325                                     | 0.452                                     | 0.594                                     | 0.8                                       |
|         | 15            |           | 0.319                                     | 0.441                                     | 0.594                                     | 0.796                                     |
|         | 20            |           | 0.317                                     | 0.436                                     | 0.584                                     | 0.795                                     |
|         | 25            |           | 0.313                                     | 0.424                                     | 0.58                                      | 0.764                                     |
| N11     | 0             |           | 0.347                                     | 0.467                                     | 0.598                                     | 0.804                                     |
|         | 5             |           | 0.335                                     | 0.466                                     | 0.587                                     | 0.785                                     |
|         | 10            |           | 0.33                                      | 0.445                                     | 0.587                                     | 0.765                                     |
|         | 15            |           | 0.329                                     | 0.444                                     | 0.579                                     | 0.758                                     |
|         | 20            |           | 0.322                                     | 0.438                                     | 0.577                                     | 0.753                                     |
|         | 25            |           | 0.303                                     | 0.429                                     | 0.57                                      | 0.752                                     |
| N12     | 0             |           | 0.336                                     | 0.465                                     | 0.593                                     | 0.814                                     |
|         | 5             |           | 0.336                                     | 0.462                                     | 0.591                                     | 0.803                                     |
|         | 10            |           | 0.332                                     | 0.457                                     | 0.59                                      | 0.802                                     |
|         | 15            |           | 0.328                                     | 0.453                                     | 0.581                                     | 0.783                                     |
|         | 20            |           | 0.327                                     | 0.45                                      | 0.58                                      | 0.764                                     |
|         | 25            |           | 0.3                                       | 0.446                                     | 0.571                                     | 0.761                                     |



**Table 38.** Table shows  $GS^3$  scores obtained by aligning the original synthetic network with its noisy versions for all the networks. Table shows that the alignment quality is constant.

| Network | Altered works | Net- | $GS^3$ on 1 coloured version | $GS^3$ on 2 coloured version | $GS^3$ on 3 coloured version | $GS^3$ on 4 coloured version |
|---------|---------------|------|------------------------------|------------------------------|------------------------------|------------------------------|
| N1      | 0             |      | 1                            | 1                            | 1                            | 1                            |
|         | 5             |      | 1                            | 1                            | 1                            | 1                            |
|         | 10            |      | 1                            | 1                            | 1                            | 1                            |
|         | 15            |      | 1                            | 1                            | 1                            | 1                            |
|         | 20            |      | 1                            | 1                            | 1                            | 1                            |
|         | 25            |      | 1                            | 1                            | 1                            | 1                            |
| N2      | 0             |      | 1                            | 1                            | 1                            | 1                            |
|         | 5             |      | 1                            | 1                            | 1                            | 1                            |
|         | 10            |      | 1                            | 1                            | 1                            | 1                            |
|         | 15            |      | 1                            | 1                            | 1                            | 1                            |
|         | 20            |      | 1                            | 1                            | 1                            | 1                            |
|         | 25            |      | 1                            | 1                            | 1                            | 1                            |
| N3      | 0             |      | 1                            | 1                            | 1                            | 1                            |
|         | 5             |      | 1                            | 1                            | 1                            | 1                            |
|         | 10            |      | 1                            | 1                            | 1                            | 1                            |
|         | 15            |      | 1                            | 1                            | 1                            | 1                            |
|         | 20            |      | 1                            | 1                            | 1                            | 1                            |
|         | 25            |      | 1                            | 1                            | 1                            | 1                            |
| N4      | 0             |      | 1                            | 1                            | 1                            | 1                            |
|         | 5             |      | 1                            | 1                            | 1                            | 1                            |
|         | 10            |      | 1                            | 1                            | 1                            | 1                            |
|         | 15            |      | 1                            | 1                            | 1                            | 1                            |
|         | 20            |      | 1                            | 1                            | 1                            | 1                            |
|         | 25            |      | 1                            | 1                            | 1                            | 1                            |
| N5      | 0             |      | 1                            | 1                            | 1                            | 1                            |
|         | 5             |      | 1                            | 1                            | 1                            | 1                            |
|         | 10            |      | 1                            | 1                            | 1                            | 1                            |
|         | 15            |      | 1                            | 1                            | 1                            | 1                            |
|         | 20            |      | 1                            | 1                            | 1                            | 1                            |
|         | 25            |      | 1                            | 1                            | 1                            | 1                            |
| N6      | 0             |      | 1                            | 1                            | 1                            | 1                            |
|         | 5             |      | 1                            | 1                            | 1                            | 1                            |
|         | 10            |      | 1                            | 1                            | 1                            | 1                            |
|         | 15            |      | 1                            | 1                            | 1                            | 1                            |
|         | 20            |      | 1                            | 1                            | 1                            | 1                            |
|         | 25            |      | 1                            | 1                            | 1                            | 1                            |
| N7      | 0             |      | 1                            | 1                            | 1                            | 1                            |
|         | 5             |      | 1                            | 1                            | 1                            | 1                            |
|         | 10            |      | 1                            | 1                            | 1                            | 1                            |
|         | 15            |      | 1                            | 1                            | 1                            | 1                            |
|         | 20            |      | 1                            | 1                            | 1                            | 1                            |
|         | 25            |      | 1                            | 1                            | 1                            | 1                            |
| N8      | 0             |      | 1                            | 1                            | 1                            | 1                            |
|         | 5             |      | 1                            | 1                            | 1                            | 1                            |
|         | 10            |      | 1                            | 1                            | 1                            | 1                            |
|         | 15            |      | 1                            | 1                            | 1                            | 1                            |
|         | 20            |      | 1                            | 1                            | 1                            | 1                            |
|         | 25            |      | 1                            | 1                            | 1                            | 1                            |
| N9      | 0             |      | 1                            | 1                            | 1                            | 1                            |
|         | 5             |      | 1                            | 1                            | 1                            | 1                            |
|         | 10            |      | 1                            | 1                            | 1                            | 1                            |
|         | 15            |      | 1                            | 1                            | 1                            | 1                            |
|         | 20            |      | 1                            | 1                            | 1                            | 1                            |
|         | 25            |      | 1                            | 1                            | 1                            | 1                            |
| N10     | 0             |      | 1                            | 1                            | 1                            | 1                            |
|         | 5             |      | 1                            | 1                            | 1                            | 1                            |
|         | 10            |      | 1                            | 1                            | 1                            | 1                            |
|         | 15            |      | 1                            | 1                            | 1                            | 1                            |
|         | 20            |      | 1                            | 1                            | 1                            | 1                            |
|         | 25            |      | 1                            | 1                            | 1                            | 1                            |
| N11     | 0             |      | 1                            | 1                            | 1                            | 1                            |
|         | 5             |      | 1                            | 1                            | 1                            | 1                            |
|         | 10            |      | 1                            | 1                            | 1                            | 1                            |
|         | 15            |      | 1                            | 1                            | 1                            | 1                            |
|         | 20            |      | 1                            | 1                            | 1                            | 1                            |
|         | 25            |      | 1                            | 1                            | 1                            | 1                            |
| N12     | 0             |      | 1                            | 1                            | 1                            | 1                            |
|         | 5             |      | 1                            | 1                            | 1                            | 1                            |
|         | 10            |      | 1                            | 1                            | 1                            | 1                            |
|         | 15            |      | 1                            | 1                            | 1                            | 1                            |
|         | 20            |      | 1                            | 1                            | 1                            | 1                            |
|         | 25            |      | 1                            | 1                            | 1                            | 1                            |

### Quality of the alignments of Hetionet network obtained by aligning each network with its noisy versions built by removing a percentage of nodes

Table 43, Table 44, Table 45, Table 46, Table 47, Table 48 report the NCV-GS<sup>3</sup>, GS<sup>3</sup>, NCV, P-NC, R-NC, F-NC measures computed on each module for the four versions of the Hetionet network obtained by aligning each network with its noisy counterpart built by removing a percentage of nodes.

### Experiments on different Network Models.

We generated the synthetic networks with different models to test the performances of our algorithm on different network structure. The aim of this experiment is to demonstrate the robustness of our approach on the change of network structure. Following results highlight that the algorithm has good performances in almost all the network models.

We built 5 synthetic networks having respectively 5000, 25000, 50000, 75000, 95000 nodes and a scale-free model. We built 5 synthetic networks having respectively 5000, 25000, 50000, 75000, 95000 nodes, and a geometric network model. We built 5 synthetic networks having respectively 5000, 25000, 50000, 75000, 95000 nodes using and a Erdos-Renyi network model. We built 5 synthetic networks having respectively 5000, 25000, 50000, 75000, 95000 nodes, and a small-world network model. Then, we randomly assign each node a colour out of n possible colours. We vary n from one to four. That is, for each synthetic network, we built heterogeneous versions with one, two, three, and four colours. Then, we built the synthetic versions for all network models by random removing 5%, 10%, 15%, 20% and 25% of edges from the original network.

Then, we applied L-HetNetAligner to align the synthetic networks with its noisy versions. Finally, we compute NCV-GS<sup>3</sup> and F-NC measures for each synthetic network model.

Table 49 and Table 53 report the NCV-GS<sup>3</sup> and F-NC measures for all the network models in one colour version. Table 50 and Table 54 report the NCV-GS<sup>3</sup> and F-NC measures for all the network models in two colour versions. Table 51 and Table 55 report the NCV-GS<sup>3</sup> and F-NC measures for all the network models in three colour versions. Table 52 and Table 56 report the NCV-GS<sup>3</sup> and F-NC measures for all the network models in four colour versions. In terms of quality, we expect that for a given noise level, the more colours are used, the better the alignment quality should be. Moreover, the use of colours should also improve the robustness to noise compared to the use of fewer colours. The analysis of results shows that for a given level of noise the use of colours improves the quality of the alignment. Besides, the robustness to the impact of noise is better.

**Table 39.** Table summarises the NCV scores obtained by aligning the original synthetic network with its noisy versions obtained by removing nodes. Table shows a significant improvement of the quality of the alignments when considering networks with many colours. The improvement is also stable for all the considered networks.

| Network | Altered works | Net-works | NCV on 1 coloured version | NCV on 2 coloured version | NCV on 3 coloured version | NCV on 4 coloured version |
|---------|---------------|-----------|---------------------------|---------------------------|---------------------------|---------------------------|
| N1      | 0             |           | 0.115                     | 0.219                     | 0.36                      | 0.667                     |
|         | 5             |           | 0.114                     | 0.216                     | 0.356                     | 0.623                     |
|         | 10            |           | 0.111                     | 0.212                     | 0.356                     | 0.608                     |
|         | 15            |           | 0.103                     | 0.203                     | 0.352                     | 0.575                     |
|         | 20            |           | 0.1                       | 0.195                     | 0.341                     | 0.572                     |
|         | 25            |           | 0.097                     | 0.18                      | 0.335                     | 0.567                     |
| N2      | 0             |           | 0.121                     | 0.212                     | 0.359                     | 0.671                     |
|         | 5             |           | 0.12                      | 0.206                     | 0.355                     | 0.663                     |
|         | 10            |           | 0.119                     | 0.201                     | 0.35                      | 0.648                     |
|         | 15            |           | 0.116                     | 0.199                     | 0.338                     | 0.646                     |
|         | 20            |           | 0.106                     | 0.194                     | 0.338                     | 0.605                     |
|         | 25            |           | 0.094                     | 0.193                     | 0.326                     | 0.599                     |
| N3      | 0             |           | 0.117                     | 0.217                     | 0.355                     | 0.659                     |
|         | 5             |           | 0.113                     | 0.216                     | 0.342                     | 0.623                     |
|         | 10            |           | 0.111                     | 0.213                     | 0.341                     | 0.605                     |
|         | 15            |           | 0.105                     | 0.204                     | 0.338                     | 0.605                     |
|         | 20            |           | 0.101                     | 0.202                     | 0.336                     | 0.59                      |
|         | 25            |           | 0.099                     | 0.188                     | 0.332                     | 0.569                     |
| N4      | 0             |           | 0.12                      | 0.22                      | 0.36                      | 0.651                     |
|         | 5             |           | 0.103                     | 0.213                     | 0.36                      | 0.65                      |
|         | 10            |           | 0.099                     | 0.211                     | 0.353                     | 0.624                     |
|         | 15            |           | 0.097                     | 0.202                     | 0.339                     | 0.618                     |
|         | 20            |           | 0.096                     | 0.191                     | 0.338                     | 0.596                     |
|         | 25            |           | 0.091                     | 0.186                     | 0.336                     | 0.581                     |
| N5      | 0             |           | 0.121                     | 0.216                     | 0.358                     | 0.666                     |
|         | 5             |           | 0.12                      | 0.213                     | 0.352                     | 0.638                     |
|         | 10            |           | 0.117                     | 0.209                     | 0.342                     | 0.619                     |
|         | 15            |           | 0.106                     | 0.207                     | 0.342                     | 0.604                     |
|         | 20            |           | 0.095                     | 0.202                     | 0.333                     | 0.599                     |
|         | 25            |           | 0.094                     | 0.191                     | 0.333                     | 0.59                      |
| N6      | 0             |           | 0.117                     | 0.213                     | 0.361                     | 0.663                     |
|         | 5             |           | 0.114                     | 0.21                      | 0.36                      | 0.663                     |
|         | 10            |           | 0.11                      | 0.201                     | 0.348                     | 0.658                     |
|         | 15            |           | 0.109                     | 0.197                     | 0.347                     | 0.621                     |
|         | 20            |           | 0.095                     | 0.195                     | 0.346                     | 0.605                     |
|         | 25            |           | 0.091                     | 0.184                     | 0.327                     | 0.587                     |
| N7      | 0             |           | 0.122                     | 0.215                     | 0.358                     | 0.659                     |
|         | 5             |           | 0.122                     | 0.213                     | 0.345                     | 0.637                     |
|         | 10            |           | 0.117                     | 0.213                     | 0.338                     | 0.624                     |
|         | 15            |           | 0.116                     | 0.196                     | 0.338                     | 0.624                     |
|         | 20            |           | 0.1                       | 0.195                     | 0.336                     | 0.619                     |
|         | 25            |           | 0.095                     | 0.189                     | 0.333                     | 0.585                     |
| N8      | 0             |           | 0.113                     | 0.22                      | 0.36                      | 0.638                     |
|         | 5             |           | 0.108                     | 0.215                     | 0.349                     | 0.635                     |
|         | 10            |           | 0.108                     | 0.207                     | 0.342                     | 0.616                     |
|         | 15            |           | 0.094                     | 0.201                     | 0.34                      | 0.616                     |
|         | 20            |           | 0.091                     | 0.179                     | 0.334                     | 0.584                     |
|         | 25            |           | 0.091                     | 0.177                     | 0.326                     | 0.57                      |
| N9      | 0             |           | 0.116                     | 0.219                     | 0.361                     | 0.627                     |
|         | 5             |           | 0.111                     | 0.206                     | 0.361                     | 0.623                     |
|         | 10            |           | 0.108                     | 0.205                     | 0.35                      | 0.602                     |
|         | 15            |           | 0.107                     | 0.199                     | 0.35                      | 0.578                     |
|         | 20            |           | 0.1                       | 0.19                      | 0.342                     | 0.569                     |
|         | 25            |           | 0.091                     | 0.185                     | 0.326                     | 0.562                     |
| N10     | 0             |           | 0.12                      | 0.213                     | 0.358                     | 0.664                     |
|         | 5             |           | 0.109                     | 0.205                     | 0.354                     | 0.663                     |
|         | 10            |           | 0.106                     | 0.204                     | 0.353                     | 0.64                      |
|         | 15            |           | 0.102                     | 0.194                     | 0.353                     | 0.634                     |
|         | 20            |           | 0.1                       | 0.19                      | 0.341                     | 0.632                     |
|         | 25            |           | 0.098                     | 0.18                      | 0.336                     | 0.584                     |
| N11     | 0             |           | 0.12                      | 0.218                     | 0.358                     | 0.646                     |
|         | 5             |           | 0.112                     | 0.217                     | 0.345                     | 0.616                     |
|         | 10            |           | 0.109                     | 0.198                     | 0.345                     | 0.585                     |
|         | 15            |           | 0.108                     | 0.197                     | 0.335                     | 0.575                     |
|         | 20            |           | 0.104                     | 0.192                     | 0.333                     | 0.567                     |
|         | 25            |           | 0.092                     | 0.184                     | 0.325                     | 0.566                     |
| N12     | 0             |           | 0.113                     | 0.216                     | 0.352                     | 0.663                     |
|         | 5             |           | 0.113                     | 0.213                     | 0.349                     | 0.645                     |
|         | 10            |           | 0.11                      | 0.209                     | 0.348                     | 0.643                     |
|         | 15            |           | 0.108                     | 0.205                     | 0.338                     | 0.613                     |
|         | 20            |           | 0.107                     | 0.202                     | 0.336                     | 0.584                     |
|         | 25            |           | 0.09                      | 0.199                     | 0.326                     | 0.579                     |

**Table 40.** P-NC scores obtained by aligning the original synthetic network with its noisy versions for all the networks. Table shows that the alignment quality is constant.

| Network | Altered works | Net- | P-NC on 1 coloured version | P-NC on 2 coloured version | P-NC on 3 coloured version | P-NC on 4 coloured version |
|---------|---------------|------|----------------------------|----------------------------|----------------------------|----------------------------|
| N1      | 0             |      | 1                          | 1                          | 1                          | 1                          |
|         | 5             |      | 1                          | 1                          | 1                          | 1                          |
|         | 10            |      | 1                          | 1                          | 1                          | 1                          |
|         | 15            |      | 1                          | 1                          | 1                          | 1                          |
|         | 20            |      | 1                          | 1                          | 1                          | 1                          |
|         | 25            |      | 1                          | 1                          | 1                          | 1                          |
| N2      | 0             |      | 1                          | 1                          | 1                          | 1                          |
|         | 5             |      | 1                          | 1                          | 1                          | 1                          |
|         | 10            |      | 1                          | 1                          | 1                          | 1                          |
|         | 15            |      | 1                          | 1                          | 1                          | 1                          |
|         | 20            |      | 1                          | 1                          | 1                          | 1                          |
|         | 25            |      | 1                          | 1                          | 1                          | 1                          |
| N3      | 0             |      | 1                          | 1                          | 1                          | 1                          |
|         | 5             |      | 1                          | 1                          | 1                          | 1                          |
|         | 10            |      | 1                          | 1                          | 1                          | 1                          |
|         | 15            |      | 1                          | 1                          | 1                          | 1                          |
|         | 20            |      | 1                          | 1                          | 1                          | 1                          |
|         | 25            |      | 1                          | 1                          | 1                          | 1                          |
| N4      | 0             |      | 1                          | 1                          | 1                          | 1                          |
|         | 5             |      | 1                          | 1                          | 1                          | 1                          |
|         | 10            |      | 1                          | 1                          | 1                          | 1                          |
|         | 15            |      | 1                          | 1                          | 1                          | 1                          |
|         | 20            |      | 1                          | 1                          | 1                          | 1                          |
|         | 25            |      | 1                          | 1                          | 1                          | 1                          |
| N5      | 0             |      | 1                          | 1                          | 1                          | 1                          |
|         | 5             |      | 1                          | 1                          | 1                          | 1                          |
|         | 10            |      | 1                          | 1                          | 1                          | 1                          |
|         | 15            |      | 1                          | 1                          | 1                          | 1                          |
|         | 20            |      | 1                          | 1                          | 1                          | 1                          |
|         | 25            |      | 1                          | 1                          | 1                          | 1                          |
| N6      | 0             |      | 1                          | 1                          | 1                          | 1                          |
|         | 5             |      | 1                          | 1                          | 1                          | 1                          |
|         | 10            |      | 1                          | 1                          | 1                          | 1                          |
|         | 15            |      | 1                          | 1                          | 1                          | 1                          |
|         | 20            |      | 1                          | 1                          | 1                          | 1                          |
|         | 25            |      | 1                          | 1                          | 1                          | 1                          |
| N7      | 0             |      | 1                          | 1                          | 1                          | 1                          |
|         | 5             |      | 1                          | 1                          | 1                          | 1                          |
|         | 10            |      | 1                          | 1                          | 1                          | 1                          |
|         | 15            |      | 1                          | 1                          | 1                          | 1                          |
|         | 20            |      | 1                          | 1                          | 1                          | 1                          |
|         | 25            |      | 1                          | 1                          | 1                          | 1                          |
| N8      | 0             |      | 1                          | 1                          | 1                          | 1                          |
|         | 5             |      | 1                          | 1                          | 1                          | 1                          |
|         | 10            |      | 1                          | 1                          | 1                          | 1                          |
|         | 15            |      | 1                          | 1                          | 1                          | 1                          |
|         | 20            |      | 1                          | 1                          | 1                          | 1                          |
|         | 25            |      | 1                          | 1                          | 1                          | 1                          |
| N9      | 0             |      | 1                          | 1                          | 1                          | 1                          |
|         | 5             |      | 1                          | 1                          | 1                          | 1                          |
|         | 10            |      | 1                          | 1                          | 1                          | 1                          |
|         | 15            |      | 1                          | 1                          | 1                          | 1                          |
|         | 20            |      | 1                          | 1                          | 1                          | 1                          |
|         | 25            |      | 1                          | 1                          | 1                          | 1                          |
| N10     | 0             |      | 1                          | 1                          | 1                          | 1                          |
|         | 5             |      | 1                          | 1                          | 1                          | 1                          |
|         | 10            |      | 1                          | 1                          | 1                          | 1                          |
|         | 15            |      | 1                          | 1                          | 1                          | 1                          |
|         | 20            |      | 1                          | 1                          | 1                          | 1                          |
|         | 25            |      | 1                          | 1                          | 1                          | 1                          |
| N11     | 0             |      | 1                          | 1                          | 1                          | 1                          |
|         | 5             |      | 1                          | 1                          | 1                          | 1                          |
|         | 10            |      | 1                          | 1                          | 1                          | 1                          |
|         | 15            |      | 1                          | 1                          | 1                          | 1                          |
|         | 20            |      | 1                          | 1                          | 1                          | 1                          |
|         | 25            |      | 1                          | 1                          | 1                          | 1                          |
| N12     | 0             |      | 1                          | 1                          | 1                          | 1                          |
|         | 5             |      | 1                          | 1                          | 1                          | 1                          |
|         | 10            |      | 1                          | 1                          | 1                          | 1                          |
|         | 15            |      | 1                          | 1                          | 1                          | 1                          |
|         | 20            |      | 1                          | 1                          | 1                          | 1                          |
|         | 25            |      | 1                          | 1                          | 1                          | 1                          |

**Table 41.** Table summarises the R-NC scores obtained by aligning the original synthetic network with its noisy versions obtained by removing nodes. Table shows a significant improvement of the quality of the alignments when considering networks with many colours. The improvement is also stable for all the considered networks.

| Network | Altered Networks (percentage of nodes removed) | R-NC on 1 coloured version | R-NC on 2 coloured version | R-NC on 3 coloured version | R-NC on 4 coloured version |
|---------|------------------------------------------------|----------------------------|----------------------------|----------------------------|----------------------------|
| N1      | 0                                              | 0.106                      | 0.193                      | 0.323                      | 0.545                      |
|         | 5                                              | 0.102                      | 0.192                      | 0.31                       | 0.543                      |
|         | 10                                             | 0.089                      | 0.185                      | 0.304                      | 0.542                      |
|         | 15                                             | 0.089                      | 0.181                      | 0.296                      | 0.531                      |
|         | 20                                             | 0.088                      | 0.166                      | 0.279                      | 0.516                      |
|         | 25                                             | 0.086                      | 0.161                      | 0.264                      | 0.511                      |
| N2      | 0                                              | 0.111                      | 0.202                      | 0.334                      | 0.54                       |
|         | 5                                              | 0.108                      | 0.181                      | 0.326                      | 0.527                      |
|         | 10                                             | 0.097                      | 0.171                      | 0.318                      | 0.524                      |
|         | 15                                             | 0.094                      | 0.168                      | 0.31                       | 0.508                      |
|         | 20                                             | 0.09                       | 0.165                      | 0.298                      | 0.506                      |
|         | 25                                             | 0.089                      | 0.154                      | 0.286                      | 0.497                      |
| N3      | 0                                              | 0.108                      | 0.176                      | 0.345                      | 0.546                      |
|         | 5                                              | 0.102                      | 0.174                      | 0.339                      | 0.526                      |
|         | 10                                             | 0.1                        | 0.167                      | 0.308                      | 0.514                      |
|         | 15                                             | 0.099                      | 0.164                      | 0.3                        | 0.504                      |
|         | 20                                             | 0.094                      | 0.162                      | 0.294                      | 0.5                        |
|         | 25                                             | 0.087                      | 0.145                      | 0.277                      | 0.498                      |
| N4      | 0                                              | 0.112                      | 0.202                      | 0.336                      | 0.539                      |
|         | 5                                              | 0.096                      | 0.193                      | 0.327                      | 0.534                      |
|         | 10                                             | 0.091                      | 0.18                       | 0.317                      | 0.516                      |
|         | 15                                             | 0.089                      | 0.166                      | 0.287                      | 0.514                      |
|         | 20                                             | 0.088                      | 0.15                       | 0.277                      | 0.501                      |
|         | 25                                             | 0.086                      | 0.147                      | 0.267                      | 0.494                      |
| N5      | 0                                              | 0.113                      | 0.196                      | 0.345                      | 0.523                      |
|         | 5                                              | 0.106                      | 0.194                      | 0.338                      | 0.506                      |
|         | 10                                             | 0.105                      | 0.187                      | 0.32                       | 0.501                      |
|         | 15                                             | 0.102                      | 0.171                      | 0.291                      | 0.501                      |
|         | 20                                             | 0.102                      | 0.154                      | 0.278                      | 0.5                        |
|         | 25                                             | 0.099                      | 0.145                      | 0.268                      | 0.493                      |
| N6      | 0                                              | 0.112                      | 0.202                      | 0.339                      | 0.536                      |
|         | 5                                              | 0.106                      | 0.2                        | 0.318                      | 0.534                      |
|         | 10                                             | 0.106                      | 0.193                      | 0.314                      | 0.529                      |
|         | 15                                             | 0.095                      | 0.174                      | 0.278                      | 0.527                      |
|         | 20                                             | 0.093                      | 0.167                      | 0.278                      | 0.521                      |
|         | 25                                             | 0.084                      | 0.15                       | 0.265                      | 0.508                      |
| N7      | 0                                              | 0.1                        | 0.201                      | 0.339                      | 0.539                      |
|         | 5                                              | 0.097                      | 0.193                      | 0.332                      | 0.529                      |
|         | 10                                             | 0.095                      | 0.175                      | 0.325                      | 0.52                       |
|         | 15                                             | 0.095                      | 0.171                      | 0.311                      | 0.517                      |
|         | 20                                             | 0.094                      | 0.165                      | 0.303                      | 0.498                      |
|         | 25                                             | 0.092                      | 0.156                      | 0.264                      | 0.497                      |
| N8      | 0                                              | 0.106                      | 0.184                      | 0.332                      | 0.539                      |
|         | 5                                              | 0.101                      | 0.183                      | 0.331                      | 0.51                       |
|         | 10                                             | 0.099                      | 0.176                      | 0.295                      | 0.506                      |
|         | 15                                             | 0.09                       | 0.176                      | 0.293                      | 0.506                      |
|         | 20                                             | 0.086                      | 0.166                      | 0.286                      | 0.503                      |
|         | 25                                             | 0.086                      | 0.158                      | 0.286                      | 0.503                      |
| N9      | 0                                              | 0.115                      | 0.185                      | 0.336                      | 0.543                      |
|         | 5                                              | 0.104                      | 0.181                      | 0.327                      | 0.542                      |
|         | 10                                             | 0.104                      | 0.175                      | 0.294                      | 0.54                       |
|         | 15                                             | 0.097                      | 0.165                      | 0.292                      | 0.534                      |
|         | 20                                             | 0.092                      | 0.156                      | 0.283                      | 0.531                      |
|         | 25                                             | 0.091                      | 0.148                      | 0.281                      | 0.508                      |
| N10     | 0                                              | 0.116                      | 0.202                      | 0.333                      | 0.531                      |
|         | 5                                              | 0.106                      | 0.186                      | 0.304                      | 0.531                      |
|         | 10                                             | 0.106                      | 0.176                      | 0.284                      | 0.529                      |
|         | 15                                             | 0.1                        | 0.171                      | 0.278                      | 0.527                      |
|         | 20                                             | 0.092                      | 0.158                      | 0.277                      | 0.524                      |
|         | 25                                             | 0.085                      | 0.147                      | 0.276                      | 0.506                      |
| N11     | 0                                              | 0.11                       | 0.198                      | 0.334                      | 0.537                      |
|         | 5                                              | 0.105                      | 0.187                      | 0.32                       | 0.526                      |
|         | 10                                             | 0.104                      | 0.171                      | 0.304                      | 0.516                      |
|         | 15                                             | 0.103                      | 0.163                      | 0.301                      | 0.507                      |
|         | 20                                             | 0.1                        | 0.151                      | 0.297                      | 0.501                      |
|         | 25                                             | 0.089                      | 0.15                       | 0.284                      | 0.494                      |
| N12     | 0                                              | 0.104                      | 0.19                       | 0.338                      | 0.536                      |
|         | 5                                              | 0.104                      | 0.187                      | 0.327                      | 0.524                      |
|         | 10                                             | 0.097                      | 0.181                      | 0.31                       | 0.521                      |
|         | 15                                             | 0.096                      | 0.176                      | 0.291                      | 0.514                      |
|         | 20                                             | 0.09                       | 0.161                      | 0.269                      | 0.514                      |
|         | 25                                             | 0.087                      | 0.158                      | 0.266                      | 0.497                      |

**Table 42.** Table summarises the F-NC scores obtained by aligning the original synthetic network with its noisy versions obtained by removing nodes. Table shows a significant improvement of the quality of the alignments when considering networks with many colours. The improvement is also stable for all the considered networks..

| Network | Altered Networks (percentage of remotion) | F-NC on 1 coloured version | F-NC on 2 coloured version | F-NC on 3 coloured version | F-NC on 4 coloured version |
|---------|-------------------------------------------|----------------------------|----------------------------|----------------------------|----------------------------|
| N1      | 0                                         | 0.325                      | 0.439                      | 0.568                      | 0.738                      |
|         | 5                                         | 0.32                       | 0.438                      | 0.557                      | 0.737                      |
|         | 10                                        | 0.299                      | 0.43                       | 0.551                      | 0.736                      |
|         | 15                                        | 0.298                      | 0.426                      | 0.544                      | 0.729                      |
|         | 20                                        | 0.297                      | 0.407                      | 0.528                      | 0.718                      |
|         | 25                                        | 0.293                      | 0.401                      | 0.514                      | 0.715                      |
| N2      | 0                                         | 0.333                      | 0.449                      | 0.578                      | 0.735                      |
|         | 5                                         | 0.329                      | 0.425                      | 0.571                      | 0.726                      |
|         | 10                                        | 0.311                      | 0.413                      | 0.564                      | 0.724                      |
|         | 15                                        | 0.306                      | 0.41                       | 0.557                      | 0.713                      |
|         | 20                                        | 0.3                        | 0.406                      | 0.546                      | 0.711                      |
|         | 25                                        | 0.298                      | 0.392                      | 0.535                      | 0.705                      |
| N3      | 0                                         | 0.328                      | 0.42                       | 0.587                      | 0.739                      |
|         | 5                                         | 0.319                      | 0.417                      | 0.582                      | 0.725                      |
|         | 10                                        | 0.316                      | 0.409                      | 0.555                      | 0.717                      |
|         | 15                                        | 0.314                      | 0.405                      | 0.548                      | 0.71                       |
|         | 20                                        | 0.307                      | 0.403                      | 0.542                      | 0.707                      |
|         | 25                                        | 0.295                      | 0.381                      | 0.526                      | 0.706                      |
| N4      | 0                                         | 0.335                      | 0.449                      | 0.58                       | 0.734                      |
|         | 5                                         | 0.31                       | 0.439                      | 0.572                      | 0.731                      |
|         | 10                                        | 0.302                      | 0.424                      | 0.563                      | 0.718                      |
|         | 15                                        | 0.299                      | 0.407                      | 0.536                      | 0.717                      |
|         | 20                                        | 0.296                      | 0.387                      | 0.526                      | 0.708                      |
|         | 25                                        | 0.294                      | 0.384                      | 0.517                      | 0.703                      |
| N5      | 0                                         | 0.336                      | 0.443                      | 0.587                      | 0.723                      |
|         | 5                                         | 0.325                      | 0.44                       | 0.581                      | 0.711                      |
|         | 10                                        | 0.324                      | 0.433                      | 0.566                      | 0.708                      |
|         | 15                                        | 0.32                       | 0.414                      | 0.539                      | 0.708                      |
|         | 20                                        | 0.319                      | 0.392                      | 0.527                      | 0.707                      |
|         | 25                                        | 0.315                      | 0.381                      | 0.518                      | 0.702                      |
| N6      | 0                                         | 0.335                      | 0.449                      | 0.582                      | 0.732                      |
|         | 5                                         | 0.326                      | 0.447                      | 0.564                      | 0.731                      |
|         | 10                                        | 0.325                      | 0.439                      | 0.56                       | 0.727                      |
|         | 15                                        | 0.309                      | 0.417                      | 0.527                      | 0.726                      |
|         | 20                                        | 0.305                      | 0.409                      | 0.527                      | 0.722                      |
|         | 25                                        | 0.29                       | 0.387                      | 0.515                      | 0.713                      |
| N7      | 0                                         | 0.316                      | 0.448                      | 0.582                      | 0.734                      |
|         | 5                                         | 0.311                      | 0.439                      | 0.576                      | 0.727                      |
|         | 10                                        | 0.308                      | 0.418                      | 0.57                       | 0.721                      |
|         | 15                                        | 0.308                      | 0.413                      | 0.558                      | 0.719                      |
|         | 20                                        | 0.306                      | 0.406                      | 0.55                       | 0.706                      |
|         | 25                                        | 0.304                      | 0.395                      | 0.514                      | 0.705                      |
| N8      | 0                                         | 0.326                      | 0.429                      | 0.576                      | 0.734                      |
|         | 5                                         | 0.318                      | 0.428                      | 0.575                      | 0.714                      |
|         | 10                                        | 0.315                      | 0.42                       | 0.543                      | 0.711                      |
|         | 15                                        | 0.3                        | 0.419                      | 0.541                      | 0.711                      |
|         | 20                                        | 0.294                      | 0.407                      | 0.535                      | 0.709                      |
|         | 25                                        | 0.294                      | 0.397                      | 0.535                      | 0.709                      |
| N9      | 0                                         | 0.339                      | 0.43                       | 0.58                       | 0.737                      |
|         | 5                                         | 0.323                      | 0.426                      | 0.572                      | 0.736                      |
|         | 10                                        | 0.323                      | 0.418                      | 0.542                      | 0.735                      |
|         | 15                                        | 0.311                      | 0.406                      | 0.54                       | 0.731                      |
|         | 20                                        | 0.303                      | 0.395                      | 0.532                      | 0.729                      |
|         | 25                                        | 0.302                      | 0.385                      | 0.53                       | 0.713                      |
| N10     | 0                                         | 0.34                       | 0.449                      | 0.577                      | 0.729                      |
|         | 5                                         | 0.326                      | 0.431                      | 0.551                      | 0.729                      |
|         | 10                                        | 0.326                      | 0.419                      | 0.533                      | 0.727                      |
|         | 15                                        | 0.316                      | 0.414                      | 0.527                      | 0.726                      |
|         | 20                                        | 0.304                      | 0.398                      | 0.526                      | 0.724                      |
|         | 25                                        | 0.292                      | 0.383                      | 0.525                      | 0.711                      |
| N11     | 0                                         | 0.331                      | 0.445                      | 0.578                      | 0.733                      |
|         | 5                                         | 0.324                      | 0.432                      | 0.566                      | 0.725                      |
|         | 10                                        | 0.322                      | 0.413                      | 0.551                      | 0.718                      |
|         | 15                                        | 0.321                      | 0.404                      | 0.549                      | 0.712                      |
|         | 20                                        | 0.317                      | 0.388                      | 0.545                      | 0.708                      |
|         | 25                                        | 0.299                      | 0.387                      | 0.533                      | 0.703                      |
| N12     | 0                                         | 0.323                      | 0.436                      | 0.581                      | 0.732                      |
|         | 5                                         | 0.322                      | 0.433                      | 0.572                      | 0.724                      |
|         | 10                                        | 0.312                      | 0.425                      | 0.557                      | 0.722                      |
|         | 15                                        | 0.31                       | 0.42                       | 0.539                      | 0.717                      |
|         | 20                                        | 0.3                        | 0.401                      | 0.519                      | 0.717                      |
|         | 25                                        | 0.295                      | 0.397                      | 0.516                      | 0.705                      |

**Table 43.** NCV-GS<sup>3</sup> scores obtained by aligning the original Hetionet network with its noisy versions (removing nodes). Table shows a remarkable trend of improvements when considering networks with many colours for all the networks.

| Network  | Altered Networks | NCV-GS <sup>3</sup> on 1 coloured version | NCV-GS <sup>3</sup> on 2 coloured version | NCV-GS <sup>3</sup> on 3 coloured version | NCV-GS <sup>3</sup> on 4 coloured version |
|----------|------------------|-------------------------------------------|-------------------------------------------|-------------------------------------------|-------------------------------------------|
| Hetionet | 0% of noise      | 0.347                                     | 0.464                                     | 0.598                                     | 0.817                                     |
|          | 5% of noise      | 0.321                                     | 0.462                                     | 0.593                                     | 0.789                                     |
|          | 10% of noise     | 0.314                                     | 0.461                                     | 0.585                                     | 0.78                                      |
|          | 15% of noise     | 0.311                                     | 0.443                                     | 0.585                                     | 0.758                                     |
|          | 20% of noise     | 0.31                                      | 0.442                                     | 0.577                                     | 0.756                                     |
|          | 25% of noise     | 0.302                                     | 0.435                                     | 0.577                                     | 0.753                                     |

**Table 44.** GS<sup>3</sup> scores obtained by aligning the original Hetionet network with its noisy versions (removing nodes). Table shows that the alignment quality is constant when considering networks with many colours.

| Network  | Altered Networks | GS <sup>3</sup> on 1 coloured version | GS <sup>3</sup> on 2 coloured version | GS <sup>3</sup> on 3 coloured version | GS <sup>3</sup> on 4 coloured version |
|----------|------------------|---------------------------------------|---------------------------------------|---------------------------------------|---------------------------------------|
| Hetionet | 0% of noise      | 1                                     | 1                                     | 1                                     | 1                                     |
|          | 5% of noise      | 1                                     | 1                                     | 1                                     | 1                                     |
|          | 10% of noise     | 1                                     | 1                                     | 1                                     | 1                                     |
|          | 15% of noise     | 1                                     | 1                                     | 1                                     | 1                                     |
|          | 20% of noise     | 1                                     | 1                                     | 1                                     | 1                                     |
|          | 25% of noise     | 1                                     | 1                                     | 1                                     | 1                                     |

**Table 45.** Table shows the NCV scores obtained by aligning the original Hetionet network with its noisy versions when removing nodes. Table shows a remarkable trend of improvement when considering networks with many colours for all the networks.

| Network  | Altered Networks (percentage of remotion) | NCV on 1 coloured version | NCV on 2 coloured version | NCV on 3 coloured version | NCV on 4 coloured version |
|----------|-------------------------------------------|---------------------------|---------------------------|---------------------------|---------------------------|
| Hetionet | 0% of noise                               | 0.12                      | 0.215                     | 0.358                     | 0.667                     |
|          | 5% of noise                               | 0.103                     | 0.213                     | 0.352                     | 0.623                     |
|          | 10% of noise                              | 0.099                     | 0.213                     | 0.342                     | 0.608                     |
|          | 15% of noise                              | 0.097                     | 0.196                     | 0.342                     | 0.575                     |
|          | 20% of noise                              | 0.096                     | 0.195                     | 0.333                     | 0.572                     |
|          | 25% of noise                              | 0.091                     | 0.189                     | 0.333                     | 0.567                     |

**Table 46.** Table shows the P-NC scores obtained by aligning the original Hetionet network with its noisy versions (when removing nodes). Table shows that the alignment quality is constant by considering both un-coloured and more colours networks.

| Network  | Altered Networks (percentage of remotion) | P-NC on 1 coloured version | P-NC on 2 coloured version | P-NC on 3 coloured version | P-NC on 4 coloured version |
|----------|-------------------------------------------|----------------------------|----------------------------|----------------------------|----------------------------|
| Hetionet | 0% of noise                               | 1                          | 1                          | 1                          | 1                          |
|          | 5% of noise                               | 1                          | 1                          | 1                          | 1                          |
|          | 10% of noise                              | 1                          | 1                          | 1                          | 1                          |
|          | 15% of noise                              | 1                          | 1                          | 1                          | 1                          |
|          | 20% of noise                              | 1                          | 1                          | 1                          | 1                          |
|          | 25% of noise                              | 1                          | 1                          | 1                          | 1                          |

**Table 47.** Table shows the R-NC scores obtained by aligning the original Hetionet network with its noisy versions when removing nodes. Table shows a remarkable trend of improvements when considering networks with many colours for all the networks.

| Network  | Altered Networks (percentage of remotion) | R-NC on 1 coloured version | R-NC on 2 coloured version | R-NC on 3 coloured version | R-NC on 4 coloured version |
|----------|-------------------------------------------|----------------------------|----------------------------|----------------------------|----------------------------|
| Hetionet | 0% of noise                               | 0.12                       | 0.215                      | 0.358                      | 0.667                      |
|          | 5% of noise                               | 0.103                      | 0.213                      | 0.352                      | 0.623                      |
|          | 10% of noise                              | 0.099                      | 0.213                      | 0.342                      | 0.608                      |
|          | 15% of noise                              | 0.097                      | 0.196                      | 0.342                      | 0.575                      |
|          | 20% of noise                              | 0.096                      | 0.195                      | 0.333                      | 0.572                      |
|          | 25% of noise                              | 0.091                      | 0.189                      | 0.333                      | 0.567                      |

**Table 48.** Table shows the F-NC scores obtained by aligning the original Hetionet network with its noisy versions when removing nodes. Table shows a remarkable trend of improvements when considering networks with many colours for all the networks.

| Network  | Altered Networks (percentage of remotion) | F-NC on 1 coloured version | F-NC on 2 coloured version | F-NC on 3 coloured version | F-NC on 4 coloured version |
|----------|-------------------------------------------|----------------------------|----------------------------|----------------------------|----------------------------|
| Hetionet | 0% of noise                               | 0.335                      | 0.449                      | 0.581                      | 0.734                      |
|          | 5% of noise                               | 0.326                      | 0.431                      | 0.572                      | 0.727                      |
|          | 10% of noise                              | 0.325                      | 0.419                      | 0.557                      | 0.721                      |
|          | 15% of noise                              | 0.309                      | 0.414                      | 0.539                      | 0.719                      |
|          | 20% of noise                              | 0.305                      | 0.398                      | 0.519                      | 0.706                      |
|          | 25% of noise                              | 0.29                       | 0.383                      | 0.516                      | 0.705                      |

**Table 49.** Table shows the NCV-GS<sup>3</sup> scores obtained by aligning the original synthetic network with its noisy versions when removing edges for all the network models having a single colour.

| Model       | Altered Networks (percentage of remotion) | 5000 nodes | 25000 nodes | 50000 nodes | 75000 nodes | 95000 nodes |
|-------------|-------------------------------------------|------------|-------------|-------------|-------------|-------------|
| Scale-free  | 0                                         | 0.468      | 0.478       | 0.498       | 0.51        | 0.529       |
|             | 5                                         | 0.467      | 0.477       | 0.497       | 0.509       | 0.528       |
|             | 10                                        | 0.466      | 0.475       | 0.491       | 0.509       | 0.524       |
|             | 15                                        | 0.466      | 0.474       | 0.491       | 0.507       | 0.521       |
|             | 20                                        | 0.463      | 0.473       | 0.488       | 0.506       | 0.516       |
|             | 25                                        | 0.461      | 0.473       | 0.486       | 0.504       | 0.514       |
| Geometric   | 0                                         | 0.468      | 0.484       | 0.499       | 0.517       | 0.544       |
|             | 5                                         | 0.467      | 0.484       | 0.498       | 0.515       | 0.543       |
|             | 10                                        | 0.464      | 0.482       | 0.497       | 0.515       | 0.542       |
|             | 15                                        | 0.464      | 0.482       | 0.496       | 0.514       | 0.541       |
|             | 20                                        | 0.462      | 0.481       | 0.494       | 0.513       | 0.539       |
|             | 25                                        | 0.461      | 0.48        | 0.491       | 0.51        | 0.539       |
| Erdos-Renyi | 0                                         | 0.466      | 0.479       | 0.495       | 0.507       | 0.53        |
|             | 5                                         | 0.462      | 0.474       | 0.494       | 0.507       | 0.529       |
|             | 10                                        | 0.461      | 0.473       | 0.494       | 0.506       | 0.529       |
|             | 15                                        | 0.459      | 0.473       | 0.492       | 0.505       | 0.527       |
|             | 20                                        | 0.453      | 0.472       | 0.488       | 0.504       | 0.527       |
|             | 25                                        | 0.451      | 0.472       | 0.486       | 0.502       | 0.521       |
| Small-world | 0                                         | 0.469      | 0.478       | 0.497       | 0.51        | 0.528       |
|             | 5                                         | 0.467      | 0.478       | 0.491       | 0.509       | 0.528       |
|             | 10                                        | 0.458      | 0.474       | 0.491       | 0.505       | 0.527       |
|             | 15                                        | 0.457      | 0.474       | 0.491       | 0.504       | 0.526       |
|             | 20                                        | 0.454      | 0.471       | 0.486       | 0.504       | 0.526       |
|             | 25                                        | 0.454      | 0.471       | 0.485       | 0.503       | 0.52        |



**Table 50.** Table shows the NCV-GS<sup>3</sup> scores obtained by aligning the original synthetic network with its noisy versions. Table presents two colored networks for all the network models.

| Model       | Altered Networks (percentage of edge remotion) | 5000 nodes | 25000 nodes | 50000 nodes | 75000 nodes | 95000 nodes |
|-------------|------------------------------------------------|------------|-------------|-------------|-------------|-------------|
| Scale-free  | 0                                              | 0.656      | 0.682       | 0.728       | 0.764       | 0.81        |
|             | 5                                              | 0.637      | 0.682       | 0.723       | 0.76        | 0.809       |
|             | 10                                             | 0.63       | 0.681       | 0.722       | 0.752       | 0.802       |
|             | 15                                             | 0.624      | 0.68        | 0.718       | 0.75        | 0.8         |
|             | 20                                             | 0.621      | 0.678       | 0.716       | 0.743       | 0.785       |
|             | 25                                             | 0.607      | 0.678       | 0.702       | 0.732       | 0.773       |
| Geometric   | 0                                              | 0.658      | 0.68        | 0.724       | 0.764       | 0.811       |
|             | 5                                              | 0.65       | 0.68        | 0.723       | 0.756       | 0.792       |
|             | 10                                             | 0.649      | 0.675       | 0.72        | 0.755       | 0.781       |
|             | 15                                             | 0.646      | 0.673       | 0.717       | 0.753       | 0.779       |
|             | 20                                             | 0.632      | 0.673       | 0.706       | 0.744       | 0.775       |
|             | 25                                             | 0.631      | 0.672       | 0.705       | 0.737       | 0.775       |
| Erdos-Renyi | 0                                              | 0.663      | 0.684       | 0.713       | 0.768       | 0.811       |
|             | 5                                              | 0.658      | 0.684       | 0.71        | 0.76        | 0.808       |
|             | 10                                             | 0.643      | 0.684       | 0.708       | 0.755       | 0.8         |
|             | 15                                             | 0.626      | 0.677       | 0.706       | 0.752       | 0.797       |
|             | 20                                             | 0.615      | 0.675       | 0.702       | 0.75        | 0.795       |
|             | 25                                             | 0.612      | 0.671       | 0.702       | 0.748       | 0.783       |
| Small-world | 0                                              | 0.666      | 0.679       | 0.726       | 0.769       | 0.803       |
|             | 5                                              | 0.641      | 0.678       | 0.723       | 0.763       | 0.793       |
|             | 10                                             | 0.641      | 0.677       | 0.721       | 0.749       | 0.787       |
|             | 15                                             | 0.64       | 0.677       | 0.72        | 0.745       | 0.787       |
|             | 20                                             | 0.62       | 0.676       | 0.719       | 0.744       | 0.785       |
|             | 25                                             | 0.616      | 0.674       | 0.705       | 0.735       | 0.779       |

**Table 51.** Table shows the NCV-GS<sup>3</sup> scores obtained by aligning the original synthetic network with three colors with its noisy versions when removing edges for all the network models.

| Model       | Altered Networks (Percentage of remotion) | 5000 nodes | 25000 nodes | 50000 nodes | 75000 nodes | 95000 nodes |
|-------------|-------------------------------------------|------------|-------------|-------------|-------------|-------------|
| Scale-free  | 0                                         | 0.818      | 0.828       | 0.834       | 0.84        | 0.883       |
|             | 5                                         | 0.817      | 0.825       | 0.833       | 0.84        | 0.883       |
|             | 10                                        | 0.816      | 0.824       | 0.833       | 0.839       | 0.883       |
|             | 15                                        | 0.815      | 0.823       | 0.833       | 0.839       | 0.871       |
|             | 20                                        | 0.813      | 0.822       | 0.832       | 0.838       | 0.865       |
|             | 25                                        | 0.813      | 0.822       | 0.831       | 0.837       | 0.843       |
| Geometric   | 0                                         | 0.82       | 0.828       | 0.834       | 0.84        | 0.882       |
|             | 5                                         | 0.819      | 0.827       | 0.834       | 0.839       | 0.879       |
|             | 10                                        | 0.818      | 0.826       | 0.833       | 0.839       | 0.869       |
|             | 15                                        | 0.816      | 0.824       | 0.833       | 0.837       | 0.848       |
|             | 20                                        | 0.815      | 0.823       | 0.832       | 0.837       | 0.847       |
|             | 25                                        | 0.813      | 0.822       | 0.831       | 0.836       | 0.844       |
| Erdos-Renyi | 0                                         | 0.819      | 0.827       | 0.833       | 0.839       | 0.869       |
|             | 5                                         | 0.818      | 0.825       | 0.832       | 0.839       | 0.866       |
|             | 10                                        | 0.816      | 0.825       | 0.831       | 0.838       | 0.855       |
|             | 15                                        | 0.815      | 0.825       | 0.831       | 0.838       | 0.855       |
|             | 20                                        | 0.814      | 0.824       | 0.83        | 0.838       | 0.851       |
|             | 25                                        | 0.813      | 0.822       | 0.83        | 0.837       | 0.847       |
| Small-world | 0                                         | 0.819      | 0.827       | 0.834       | 0.839       | 0.871       |
|             | 5                                         | 0.818      | 0.826       | 0.834       | 0.838       | 0.863       |
|             | 10                                        | 0.818      | 0.826       | 0.832       | 0.838       | 0.855       |
|             | 15                                        | 0.817      | 0.825       | 0.832       | 0.837       | 0.848       |
|             | 20                                        | 0.814      | 0.823       | 0.832       | 0.837       | 0.846       |
|             | 25                                        | 0.814      | 0.822       | 0.83        | 0.836       | 0.843       |

**Table 52.** Table summarises the NCV-GS<sup>3</sup> scores obtained by aligning the original synthetic network with four colours with its noisy versions when removing edges for all the network models.

| Model       | Altered Networks (percentage of remotion) | 5000 nodes | 25000 nodes | 50000 nodes | 75000 nodes | 95000 nodes |
|-------------|-------------------------------------------|------------|-------------|-------------|-------------|-------------|
| Scale-free  | 0                                         | 0.898      | 0.898       | 0.939       | 0.948       | 0.997       |
|             | 5                                         | 0.898      | 0.898       | 0.939       | 0.947       | 0.988       |
|             | 10                                        | 0.898      | 0.898       | 0.939       | 0.946       | 0.986       |
|             | 15                                        | 0.888      | 0.888       | 0.937       | 0.945       | 0.979       |
|             | 20                                        | 0.887      | 0.887       | 0.936       | 0.945       | 0.976       |
|             | 25                                        | 0.885      | 0.885       | 0.932       | 0.941       | 0.953       |
| Geometric   | 0                                         | 0.898      | 0.898       | 0.936       | 0.951       | 0.992       |
|             | 5                                         | 0.898      | 0.898       | 0.933       | 0.948       | 0.991       |
|             | 10                                        | 0.895      | 0.895       | 0.932       | 0.947       | 0.99        |
|             | 15                                        | 0.894      | 0.894       | 0.93        | 0.946       | 0.984       |
|             | 20                                        | 0.889      | 0.889       | 0.93        | 0.945       | 0.981       |
|             | 25                                        | 0.889      | 0.889       | 0.93        | 0.944       | 0.967       |
| Erdos-Renyi | 0                                         | 0.898      | 0.898       | 0.936       | 0.952       | 0.995       |
|             | 5                                         | 0.892      | 0.892       | 0.935       | 0.95        | 0.994       |
|             | 10                                        | 0.892      | 0.892       | 0.935       | 0.948       | 0.993       |
|             | 15                                        | 0.891      | 0.891       | 0.934       | 0.945       | 0.975       |
|             | 20                                        | 0.887      | 0.887       | 0.931       | 0.943       | 0.962       |
|             | 25                                        | 0.885      | 0.885       | 0.93        | 0.942       | 0.959       |
| Small-world | 0                                         | 0.899      | 0.899       | 0.938       | 0.948       | 0.993       |
|             | 5                                         | 0.896      | 0.896       | 0.936       | 0.948       | 0.988       |
|             | 10                                        | 0.895      | 0.895       | 0.936       | 0.947       | 0.985       |
|             | 15                                        | 0.895      | 0.895       | 0.936       | 0.946       | 0.97        |
|             | 20                                        | 0.889      | 0.889       | 0.934       | 0.945       | 0.96        |
|             | 25                                        | 0.884      | 0.884       | 0.931       | 0.942       | 0.955       |

**Table 53.** Table shows the F-NC scores obtained by aligning the original synthetic network with one color with four colours with its noisy versions when removing edges for all the network models.

| Model       | Altered Networks (percentage of remotion) | 5000 nodes | 25000 nodes | 50000 nodes | 75000 nodes | 95000 nodes |
|-------------|-------------------------------------------|------------|-------------|-------------|-------------|-------------|
| Scale-free  | 0                                         | 0.609      | 0.628       | 0.649       | 0.69        | 0.706       |
|             | 5                                         | 0.608      | 0.627       | 0.648       | 0.688       | 0.704       |
|             | 10                                        | 0.606      | 0.626       | 0.647       | 0.685       | 0.699       |
|             | 15                                        | 0.606      | 0.625       | 0.646       | 0.684       | 0.698       |
|             | 20                                        | 0.604      | 0.624       | 0.645       | 0.683       | 0.695       |
|             | 25                                        | 0.604      | 0.624       | 0.644       | 0.681       | 0.695       |
| Geometric   | 0                                         | 0.609      | 0.629       | 0.648       | 0.689       | 0.811       |
|             | 5                                         | 0.606      | 0.628       | 0.648       | 0.687       | 0.792       |
|             | 10                                        | 0.606      | 0.626       | 0.648       | 0.686       | 0.781       |
|             | 15                                        | 0.605      | 0.626       | 0.644       | 0.685       | 0.779       |
|             | 20                                        | 0.605      | 0.626       | 0.643       | 0.685       | 0.775       |
|             | 25                                        | 0.603      | 0.624       | 0.642       | 0.684       | 0.775       |
| Erdos-Renyi | 0                                         | 0.607      | 0.629       | 0.649       | 0.689       | 0.811       |
|             | 5                                         | 0.607      | 0.628       | 0.649       | 0.689       | 0.808       |
|             | 10                                        | 0.607      | 0.626       | 0.647       | 0.688       | 0.8         |
|             | 15                                        | 0.606      | 0.623       | 0.645       | 0.687       | 0.797       |
|             | 20                                        | 0.606      | 0.623       | 0.641       | 0.686       | 0.795       |
|             | 25                                        | 0.601      | 0.622       | 0.64        | 0.682       | 0.783       |
| Small-world | 0                                         | 0.61       | 0.63        | 0.65        | 0.69        | 0.803       |
|             | 5                                         | 0.609      | 0.628       | 0.647       | 0.689       | 0.793       |
|             | 10                                        | 0.608      | 0.628       | 0.647       | 0.689       | 0.787       |
|             | 15                                        | 0.608      | 0.627       | 0.646       | 0.687       | 0.787       |
|             | 20                                        | 0.602      | 0.626       | 0.643       | 0.685       | 0.785       |
|             | 25                                        | 0.601      | 0.623       | 0.642       | 0.683       | 0.779       |

**Table 54.** Table shows the F-NC scores obtained by aligning the original synthetic network with two colors and its noisy versions for all the network models.

| Model       | Altered Networks (Percentage of Noise) | 5000 nodes | 25000 nodes | 50000 nodes | 75000 nodes | 95000 nodes |
|-------------|----------------------------------------|------------|-------------|-------------|-------------|-------------|
| Scale-free  | 0                                      | 0.609      | 0.628       | 0.649       | 0.69        | 0.706       |
|             | 5                                      | 0.608      | 0.627       | 0.648       | 0.688       | 0.704       |
|             | 10                                     | 0.606      | 0.626       | 0.647       | 0.685       | 0.699       |
|             | 15                                     | 0.606      | 0.625       | 0.646       | 0.684       | 0.698       |
|             | 20                                     | 0.604      | 0.624       | 0.645       | 0.683       | 0.695       |
|             | 25                                     | 0.604      | 0.624       | 0.644       | 0.681       | 0.695       |
| Geometric   | 0                                      | 0.609      | 0.629       | 0.648       | 0.689       | 0.811       |
|             | 5                                      | 0.606      | 0.628       | 0.648       | 0.687       | 0.792       |
|             | 10                                     | 0.606      | 0.626       | 0.648       | 0.686       | 0.781       |
|             | 15                                     | 0.605      | 0.626       | 0.644       | 0.685       | 0.779       |
|             | 20                                     | 0.605      | 0.626       | 0.643       | 0.685       | 0.775       |
|             | 25                                     | 0.603      | 0.624       | 0.642       | 0.684       | 0.775       |
| Erdos-Renyi | 0                                      | 0.607      | 0.629       | 0.649       | 0.689       | 0.811       |
|             | 5                                      | 0.607      | 0.628       | 0.649       | 0.689       | 0.808       |
|             | 10                                     | 0.607      | 0.626       | 0.647       | 0.688       | 0.8         |
|             | 15                                     | 0.606      | 0.623       | 0.645       | 0.687       | 0.797       |
|             | 20                                     | 0.606      | 0.623       | 0.641       | 0.686       | 0.795       |
|             | 25                                     | 0.601      | 0.622       | 0.64        | 0.682       | 0.783       |
| Small-world | 0                                      | 0.61       | 0.63        | 0.65        | 0.69        | 0.803       |
|             | 5                                      | 0.609      | 0.628       | 0.647       | 0.689       | 0.793       |
|             | 10                                     | 0.608      | 0.628       | 0.647       | 0.689       | 0.787       |
|             | 15                                     | 0.608      | 0.627       | 0.646       | 0.687       | 0.787       |
|             | 20                                     | 0.602      | 0.626       | 0.643       | 0.685       | 0.785       |
|             | 25                                     | 0.601      | 0.623       | 0.642       | 0.683       | 0.779       |

**Table 55.** Table shows F-NC scores obtained by aligning the original synthetic network with three colours and its noisy versions when removing edges for all the network models.

| Model       | Altered Networks (Percentage of removed edges) | 5000 nodes | 25000 nodes | 50000 nodes | 75000 nodes | 95000 nodes |
|-------------|------------------------------------------------|------------|-------------|-------------|-------------|-------------|
| Scale-free  | 0                                              | 0.729      | 0.75        | 0.754       | 0.765       | 0.841       |
|             | 5                                              | 0.727      | 0.75        | 0.753       | 0.764       | 0.835       |
|             | 10                                             | 0.725      | 0.743       | 0.751       | 0.762       | 0.798       |
|             | 15                                             | 0.719      | 0.742       | 0.751       | 0.76        | 0.783       |
|             | 20                                             | 0.717      | 0.74        | 0.748       | 0.759       | 0.762       |
|             | 25                                             | 0.711      | 0.735       | 0.747       | 0.756       | 0.76        |
| Geometric   | 0                                              | 0.727      | 0.748       | 0.754       | 0.766       | 0.824       |
|             | 5                                              | 0.724      | 0.743       | 0.752       | 0.764       | 0.82        |
|             | 10                                             | 0.719      | 0.737       | 0.752       | 0.762       | 0.804       |
|             | 15                                             | 0.717      | 0.737       | 0.75        | 0.76        | 0.782       |
|             | 20                                             | 0.717      | 0.735       | 0.747       | 0.759       | 0.775       |
|             | 25                                             | 0.714      | 0.732       | 0.743       | 0.757       | 0.77        |
| Erdos-Renyi | 0                                              | 0.729      | 0.749       | 0.752       | 0.765       | 0.823       |
|             | 5                                              | 0.726      | 0.744       | 0.751       | 0.764       | 0.822       |
|             | 10                                             | 0.72       | 0.741       | 0.751       | 0.764       | 0.802       |
|             | 15                                             | 0.718      | 0.738       | 0.749       | 0.762       | 0.783       |
|             | 20                                             | 0.717      | 0.736       | 0.746       | 0.761       | 0.778       |
|             | 25                                             | 0.717      | 0.732       | 0.743       | 0.76        | 0.769       |
| Small-world | 0                                              | 0.729      | 0.75        | 0.755       | 0.763       | 0.834       |
|             | 5                                              | 0.728      | 0.75        | 0.748       | 0.76        | 0.82        |
|             | 10                                             | 0.725      | 0.74        | 0.747       | 0.759       | 0.812       |
|             | 15                                             | 0.72       | 0.74        | 0.747       | 0.759       | 0.781       |
|             | 20                                             | 0.717      | 0.739       | 0.744       | 0.759       | 0.78        |
|             | 25                                             | 0.715      | 0.732       | 0.743       | 0.758       | 0.772       |

**Table 56.** Table shows the F-NC scores obtained by aligning the original synthetic network with four colours and its noisy versions when removing edges for all the network models.

| Model       | Altered Networks (percentage of removed edges) | 5000 nodes | 25000 nodes | 50000 nodes | 75000 nodes | 95000 nodes |
|-------------|------------------------------------------------|------------|-------------|-------------|-------------|-------------|
| Scale-free  | 0                                              | 0.849      | 0.857       | 0.873       | 0.917       | 0.98        |
|             | 5                                              | 0.847      | 0.857       | 0.866       | 0.91        | 0.964       |
|             | 10                                             | 0.847      | 0.857       | 0.865       | 0.908       | 0.957       |
|             | 15                                             | 0.846      | 0.854       | 0.857       | 0.905       | 0.953       |
|             | 20                                             | 0.846      | 0.853       | 0.855       | 0.904       | 0.943       |
|             | 25                                             | 0.844      | 0.85        | 0.854       | 0.904       | 0.904       |
| Geometric   | 0                                              | 0.847      | 0.86        | 0.87        | 0.919       | 0.975       |
|             | 5                                              | 0.847      | 0.858       | 0.866       | 0.917       | 0.966       |
|             | 10                                             | 0.846      | 0.857       | 0.862       | 0.912       | 0.965       |
|             | 15                                             | 0.846      | 0.856       | 0.862       | 0.911       | 0.959       |
|             | 20                                             | 0.845      | 0.855       | 0.854       | 0.904       | 0.956       |
|             | 25                                             | 0.845      | 0.855       | 0.852       | 0.903       | 0.954       |
| Erdos-Renyi | 0                                              | 0.849      | 0.856       | 0.875       | 0.92        | 0.957       |
|             | 5                                              | 0.848      | 0.856       | 0.87        | 0.913       | 0.955       |
|             | 10                                             | 0.847      | 0.854       | 0.867       | 0.91        | 0.954       |
|             | 15                                             | 0.845      | 0.852       | 0.867       | 0.908       | 0.953       |
|             | 20                                             | 0.844      | 0.852       | 0.865       | 0.905       | 0.947       |
|             | 25                                             | 0.843      | 0.851       | 0.861       | 0.903       | 0.945       |
| Small-world | 0                                              | 0.849      | 0.857       | 0.874       | 0.92        | 0.974       |
|             | 5                                              | 0.848      | 0.857       | 0.871       | 0.916       | 0.969       |
|             | 10                                             | 0.847      | 0.856       | 0.868       | 0.914       | 0.968       |
|             | 15                                             | 0.847      | 0.854       | 0.867       | 0.913       | 0.967       |
|             | 20                                             | 0.846      | 0.853       | 0.858       | 0.906       | 0.963       |
|             | 25                                             | 0.845      | 0.852       | 0.857       | 0.903       | 0.957       |

**Table 57.** NCV-GS<sup>3</sup> scores obtained by aligning the original network with its noisy versions (edges removing). Table shows a remarkable trend of improvements when considering networks with many colours for all the networks.

| Network | Altered Networks | 1 colour | 2 colour | 3 colour | 4 colour | 5 colour | 6 colour | 7 colour | 8 colour |
|---------|------------------|----------|----------|----------|----------|----------|----------|----------|----------|
| N       | 0% of noise      | 0.418    | 0.533    | 0.665    | 0.704    | 0.813    | 0.867    | 0.898    | 1        |
|         | 5% of noise      | 0.413    | 0.53     | 0.647    | 0.703    | 0.803    | 0.856    | 0.898    | 0.996    |
|         | 10% of noise     | 0.411    | 0.53     | 0.632    | 0.701    | 0.774    | 0.854    | 0.897    | 0.986    |
|         | 15% of noise     | 0.411    | 0.526    | 0.629    | 0.701    | 0.763    | 0.843    | 0.897    | 0.982    |
|         | 20% of noise     | 0.401    | 0.519    | 0.625    | 0.699    | 0.76     | 0.834    | 0.888    | 0.98     |
|         | 25% of noise     | 0.392    | 0.518    | 0.602    | 0.698    | 0.745    | 0.825    | 0.88     | 0.963    |

### Synthetic Networks with eight colors.

The input dataset consists of a synthetic networks built using scale-free networks (SF) graph generator. The network has 950 nodes and 4124. Then, we assign each node a colour out of  $n$  possible colours. We vary  $n$  from 1 to 8 in order to build four heterogeneous versions for each synthetic network as follows:

- 1 coloured version;
- 2 coloured version ( in which 580 nodes present one colour and 382 nodes have another colour);
- 3 coloured version where we randomly assign one colour to 358 nodes, a second colour to 256 nodes and a third colour to 336 nodes;
- 4 coloured version where we randomly assign one colour to 170 nodes, a second colour to 288 nodes, a third colour to 192 nodes and a fourth to 300 nodes.
- 5 coloured version where we randomly assign one colour to 110 nodes, a second colour to 210 nodes, a third colour to 157 nodes, a fourth colour to 314 nodes and a fifth to 159 node;
- 6 coloured version where we randomly assign one colour to 98 nodes, a second colour to 124 nodes, a third colour to 242 nodes, a fourth colour to 103 nodes, a fifth colour to 211 nodes and sixth to 172 nodes;
- 7 coloured version where we randomly assign one colour to 110 nodes, a second colour to 124 nodes, a third colour to 170 nodes, a fourth colour to 223 nodes, a fifth colour to 94 nodes, a sixth to 115 nodes and seventh to 114 nodes;
- 8 coloured version where we randomly assign one colour to 110 nodes, a second colour to 94 nodes, a third colour to 121 nodes, a fourth to 97 nodes, a fifth colour to 128 nodes, a sixth to 100 nodes, seventh colour to 130 nodes and eighth to 170 nodes.

We built the synthetic versions by random removing 5%, 10%, 15%, 20% and 25% of edges from the original network.

Then, we applied L-HetNetAligner to align the synthetic network with its noisy versions. Finally, we compute NCV-GS<sup>3</sup> and F-NC measures for each synthetic network.

Table 57 and Table 58 report the NCV-GS<sup>3</sup> and F-NC the measures related to the alignment of the original synthetic network with its versions at 0%, 5%, 10%, 15%, 20% and 25% of added noise for all synthetic networks.

In terms of quality, we expect that for a given noise level, the more colours are used, the better the alignment quality should be. Moreover, the use of colours should also improve the robustness to noise compared to the use of fewer colours. The analysis of results shows that for a given level of noise the use of colours improves the quality of the alignment. Besides, the robustness to the impact of noise is better.

**Table 58.** F-NC scores obtained by aligning the original network with its noisy versions (edges removing). Table shows a remarkable trend of improvements when considering networks with many colours for all the networks.

| Network | Altered Networks | 1 colour | 2 colour | 3 colour | 4 colour | 5 colour | 6 colour | 7 colour | 8 colour |
|---------|------------------|----------|----------|----------|----------|----------|----------|----------|----------|
| N       | 0% of noise      | 0.412    | 0.558    | 0.664    | 0.705    | 0.725    | 0.839    | 0.877    | 0.976    |
|         | 5% of noise      | 0.412    | 0.551    | 0.654    | 0.705    | 0.724    | 0.831    | 0.894    | 0.935    |
|         | 10% of noise     | 0.41     | 0.542    | 0.622    | 0.704    | 0.705    | 0.818    | 0.893    | 0.935    |
|         | 15% of noise     | 0.407    | 0.527    | 0.62     | 0.703    | 0.703    | 0.814    | 0.885    | 0.925    |
|         | 20% of noise     | 0.397    | 0.475    | 0.617    | 0.695    | 0.702    | 0.785    | 0.882    | 0.907    |
|         | 25% of noise     | 0.393    | 0.473    | 0.615    | 0.694    | 0.701    | 0.775    | 0.879    | 0.904    |

### Comparison with respect to Single Color Alignments.

To demonstrate the effectiveness of L-HetNaligner we want to test if our algorithm is able to obtain better results when we apply it on the original network than on different subnetworks obtained from this one.

We considered two cases 1) synthetic networks, and 2) Hetionet network.

We consider the same synthetic network with 950 nodes and 3410 edges and four node colors. Then we split this network into four network considering nodes of the same color.

We obtain the **subnetwork 1** has 170 nodes and 474 edges, the **subnetwork 2** has 250 nodes and 422 edges, the **subnetwork 3** has 330 nodes and 528 edges, and the **subnetwork 4** has 220 nodes and 404 edges. Please note that the sum of the edges of the four subnetworks is lower than the number of the initial network since all the *cross*-edges, i.e. edges among node of different colors, have been removed.

We select the Hetionet network (with 37142 nodes and 6014211 edges) in four coloured version and from it we created four subnetwork according to four node types (i.e. colours.) According to this, the subnetwork 1 has 2095 nodes and 26567 edges, subnetwork 2 has 136 nodes and 543 edges, subnetwork 3 has 405 nodes and 742 edges, subnetwork 15056 has 78234 nodes and 404 edges.

Then, we built the synthetic versions for the synthetic network and Hetionet network and their subnetworks by random removing 5%, 10%, 15%, 20% and 25% of edges from the original network.

Then, we applied L-HetNetAligner to align the synthetic networks and Hetionet network with their sub networks with their noisy versions. Then, we compute NCV-GS<sup>3</sup> and F-NC measures for the synthetic network and Hetionet network and for the sub networks. Finally, we tested the ability of our algorithm to infer missing links from input networks (link prediction) by count how many homogeneous and heterogeneous gaps are found in the alignment graph of the synthetic network and Hetionet network and for their sub networks.

Table 59 and Table 60 report NCV-GS<sup>3</sup> and F-NC scores the synthetic network and its four subnetwork and Hetionet network and its four subnetwork. As evident the NCV-GS<sup>3</sup> and F-NC values in original network outperform NCV-GS<sup>3</sup> and F-NC values in subnetworks for both synthetic network and Hetionet network.

**Table 59.** NCV-GS<sup>3</sup> and F-NC scores obtained by aligning the synthetic network with its noisy versions and the four subnetworks with their noisy versions.

| Network   | Altered Networks | NCV-GS <sup>3</sup> | F-NC  |
|-----------|------------------|---------------------|-------|
| Synthetic | 0% of noise      | 0.99                | 0.98  |
|           | 5% of noise      | 0.989               | 0.964 |
|           | 10% of noise     | 0.983               | 0.957 |
|           | 15% of noise     | 0.978               | 0.953 |
|           | 20% of noise     | 0.96                | 0.943 |
|           | 25% of noise     | 0.957               | 0.904 |
| subn 1    | 0% of noise      | 0.687               | 0.619 |
|           | 5% of noise      | 0.68                | 0.619 |
|           | 10% of noise     | 0.677               | 0.616 |
|           | 15% of noise     | 0.677               | 0.606 |
|           | 20% of noise     | 0.664               | 0.604 |
|           | 25% of noise     | 0.663               | 0.604 |
| subn 2    | 0% of noise      | 0.697               | 0.633 |
|           | 5% of noise      | 0.696               | 0.627 |
|           | 10% of noise     | 0.694               | 0.619 |
|           | 15% of noise     | 0.662               | 0.609 |
|           | 20% of noise     | 0.657               | 0.606 |
|           | 25% of noise     | 0.655               | 0.606 |
| subn 3    | 0% of noise      | 0.702               | 0.631 |
|           | 5% of noise      | 0.696               | 0.629 |
|           | 10% of noise     | 0.689               | 0.629 |
|           | 15% of noise     | 0.672               | 0.625 |
|           | 20% of noise     | 0.665               | 0.623 |
|           | 25% of noise     | 0.657               | 0.61  |
| subn 4    | 0% of noise      | 0.694               | 0.63  |
|           | 5% of noise      | 0.69                | 0.625 |
|           | 10% of noise     | 0.685               | 0.625 |
|           | 15% of noise     | 0.665               | 0.611 |
|           | 20% of noise     | 0.658               | 0.608 |
|           | 25% of noise     | 0.656               | 0.602 |



**Table 60.** NCV-GS<sup>3</sup> and F-NC scores obtained by aligning the Hetionet network with its noisy versions and the four subnetworks with their noisy versions .

| Network  | Altered Networks | NCV-GS <sup>3</sup> | F-NC  |
|----------|------------------|---------------------|-------|
| Hetionet | 0% of noise      | 1                   | 0.989 |
|          | 5% of noise      | 0.996               | 0.961 |
|          | 10% of noise     | 0.996               | 0.952 |
|          | 15% of noise     | 0.966               | 0.943 |
|          | 20% of noise     | 0.954               | 0.923 |
|          | 25% of noise     | 0.951               | 0.912 |
| subn 1   | 0% of noise      | 0.623               | 0.607 |
|          | 5% of noise      | 0.623               | 0.601 |
|          | 10% of noise     | 0.618               | 0.597 |
|          | 15% of noise     | 0.601               | 0.583 |
|          | 20% of noise     | 0.595               | 0.581 |
|          | 25% of noise     | 0.592               | 0.57  |
| subn 2   | 0% of noise      | 0.612               | 0.611 |
|          | 5% of noise      | 0.606               | 0.608 |
|          | 10% of noise     | 0.604               | 0.605 |
|          | 15% of noise     | 0.604               | 0.601 |
|          | 20% of noise     | 0.593               | 0.598 |
|          | 25% of noise     | 0.59                | 0.567 |
| subn 3   | 0% of noise      | 0.612               | 0.611 |
|          | 5% of noise      | 0.606               | 0.609 |
|          | 10% of noise     | 0.595               | 0.591 |
|          | 15% of noise     | 0.594               | 0.576 |
|          | 20% of noise     | 0.589               | 0.571 |
|          | 25% of noise     | 0.588               | 0.57  |
| subn 4   | 0% of noise      | 0.621               | 0.609 |
|          | 5% of noise      | 0.62                | 0.592 |
|          | 10% of noise     | 0.612               | 0.588 |
|          | 15% of noise     | 0.606               | 0.586 |
|          | 20% of noise     | 0.605               | 0.576 |
|          | 25% of noise     | 0.601               | 0.568 |

#### **Predicted Links Missed by Single Color Alignments**

Table 61 reports the number of correctly predicted links obtained by aligning original synthetic network and its subnetworks with its noisy versions obtained by random removal of pair-matched nodes for all the networks. Table 62 reports the number of correctly predicted links obtained by aligning Hetionet network and its subnetworks with its noisy versions obtained by random removal of pair-matched nodes for all the networks.

We should note L-HetNetAligner can predict a high number of link for the synthetic network respect to its sub networks and for Hetionet respect to its sub networks.

Finally, we reported an examples of predicted link in Hetionet networks:

- Metaedge **Anatomy::UBERON:0000955-Gene::3892** is missing in one coloured version and it is predicted in two, three and four colour versions;
- Metaedges **Gene::3725- Molecular Function::GO:0070412, Gene::6259-Biological Process::GO:0032990, Anatomy::UBERON:0002030-Gene::79944** are predicted only four colour versions.
- Metaedges **Gene::9585-Molecular Function::GO:0017111, Gene::3433 -Gene::3875, Anatomy::UBERON:0002037- Gene::56288** is missing in one coloured version and it is predicted in two, three and four colour versions;
- Metaedges **Disease::DOID:3393-Gene::28, Gene::25-Biological Process::GO:1903530, Anatomy::UBERON:0000473- Gene::124961, Gene::51111 Molecular Function::GO:0016278, Disease::DOID:1793 Gene::4893** is missing in one and two coloured version and it is predicted in three and four colour versions;
- Metaedges **Disease::DOID:3393-Gene::28, Gene::25-Biological Process::GO:1903530, Anatomy::UBERON:0000473- Gene::124961, Gene::51111 Molecular Function::GO:0016278, Disease::DOID:1793 Gene::4893, Disease::DOID:0050156- Gene::664, Gene::3385-Molecular Function::GO:0005178, Gene::57835-Molecular Function::GO:0015081, Anatomy::UBERON:0002240-Gene::81502, Anatomy::UBERON:0001044-Gene::80790, Anatomy::UBERON:0000473- Gene::9778, Gene::2624-Biological Process::GO:0030100, Gene::7903-Biological Process::GO:0006664, Gene::64220- Biological Process::GO:0048592, Gene::7321-Gene::84231, Gene::6737-Gene::8202, Gene::10987-Gene::26054, Gene::3320-Gene::23118, Gene::3146-Gene::55806, Gene::7525-Gene::8751, Disease::DOID:3393-Gene::9314, Disease::DOID:8778-Gene::10285, Disease::DOID:1324-Gene::23532, Disease::DOID:2841-Gene::6701, Disease::DOID:1936-Gene::3569, Disease::DOID:2986-Gene::10550, Disease::DOID:1790-Gene::5734** are predicted only four colour versions.

**Table 61.** Corrected predicted links obtained by aligning the original synthetic network and four subnetworks with its noisy versions for all the networks.

| Network   | Nodes | Edges | 5% of noise | 10% of noise | 15% of noise | 20% of noise | 25% of noise |
|-----------|-------|-------|-------------|--------------|--------------|--------------|--------------|
| Synthetic | 950   | 3410  | 190         | 360          | 490          | 550          | 600          |
| sb1       | 170   | 474   | 24          | 44           | 78           | 84           | 112          |
| sb2       | 250   | 422   | 34          | 49           | 67           | 79           | 123          |
| sb3       | 330   | 528   | 55          | 63           | 77           | 82           | 104          |
| sb4       | 200   | 404   | 21          | 45           | 63           | 98           | 132          |

**Table 62.** Corrected predicted links obtained by aligning the original Hetionet network and four subnetworks with its noisy versions for all the networks.

| Network  | Nodes | Edges   | 5% of noise | 10% of noise | 15% of noise | 20% of noise | 25% of noise |
|----------|-------|---------|-------------|--------------|--------------|--------------|--------------|
| Hetionet | 37142 | 6014211 | 5439        | 7592         | 8357         | 12686        | 21678        |
| sb1      | 2095  | 26567   | 634         | 1252         | 1472         | 2689         | 3567         |
| sb2      | 136   | 543     | 12          | 31           | 78           | 87           | 98           |
| sb3      | 405   | 742     | 22          | 51           | 89           | 112          | 167          |
| sb4      | 15056 | 78234   | 1278        | 1310         | 2014         | 3244         | 4543         |

### Running L-HetNetAligner using all the pairs of nodes as input.

To demonstrated the effectiveness of L-HetNaligner we also performed the alignment of synthetic network with its noisy versions by providing, instead of similarity function among the nodes, all pair of nodes in the input step. We selected one synthetic network (previously generated) with 950 nodes and 3410 edges. Then, we built the synthetic versions by random removing 5%, 10%, 15%, 20% and 25% of edges from the original network. Then, we applied L-HetNetAligner to align the synthetic networks with its noisy versions. Then, we applied L-HetNetAligner to align the synthetic networks with its noisy versions. Finally, we computed NCV-GS<sup>3</sup> and F-NC measures for each synthetic network model.

L-HetNetAligner completed the process of alignment of synthetic networks with its noisy counterpart in almost 67 minutes, and the process occupes 8 GB of Memory. Table 63 and Table 66 report the NCV-GS<sup>3</sup> and F-NC scores. The NCV-GS<sup>3</sup> and F-NC values are much lower than NCV-GS<sup>3</sup> and F-NC value obtained when the similarity function among nodes is used in the alignment building.

### Impact of the Variation of the Parameters to the Alignment Quality

**Table 63.** NCV-GS<sup>3</sup> scores obtained by aligning the original synthetic network with its noisy versions for all the networks. In the alignment graph building all pair of nodes were selected.

| Network | Altered works | Net-works | NCV-GS <sup>3</sup> on 1 coloured version | NCV-GS <sup>3</sup> on 2 coloured version | NCV-GS <sup>3</sup> on 3 coloured version | NCV-GS <sup>3</sup> on 4 coloured version |
|---------|---------------|-----------|-------------------------------------------|-------------------------------------------|-------------------------------------------|-------------------------------------------|
| N1      | 0             |           | 0.367                                     | 0.49                                      | 0.59                                      | 0.776                                     |
|         | 5             |           | 0.359                                     | 0.476                                     | 0.59                                      | 0.774                                     |
|         | 10            |           | 0.355                                     | 0.474                                     | 0.589                                     | 0.768                                     |
|         | 15            |           | 0.351                                     | 0.474                                     | 0.586                                     | 0.765                                     |
|         | 20            |           | 0.346                                     | 0.47                                      | 0.584                                     | 0.764                                     |
|         | 25            |           | 0.335                                     | 0.462                                     | 0.574                                     | 0.755                                     |
| N2      | 0             |           | 0.364                                     | 0.483                                     | 0.595                                     | 0.783                                     |
|         | 5             |           | 0.364                                     | 0.482                                     | 0.593                                     | 0.777                                     |
|         | 10            |           | 0.363                                     | 0.48                                      | 0.589                                     | 0.776                                     |
|         | 15            |           | 0.358                                     | 0.477                                     | 0.586                                     | 0.776                                     |
|         | 20            |           | 0.353                                     | 0.471                                     | 0.582                                     | 0.771                                     |
|         | 25            |           | 0.342                                     | 0.457                                     | 0.573                                     | 0.765                                     |
| N3      | 0             |           | 0.352                                     | 0.488                                     | 0.595                                     | 0.788                                     |
|         | 5             |           | 0.349                                     | 0.476                                     | 0.588                                     | 0.785                                     |
|         | 10            |           | 0.342                                     | 0.468                                     | 0.581                                     | 0.784                                     |
|         | 15            |           | 0.34                                      | 0.464                                     | 0.576                                     | 0.778                                     |
|         | 20            |           | 0.336                                     | 0.459                                     | 0.57                                      | 0.77                                      |
|         | 25            |           | 0.336                                     | 0.456                                     | 0.57                                      | 0.762                                     |
| N4      | 0             |           | 0.368                                     | 0.487                                     | 0.593                                     | 0.787                                     |
|         | 5             |           | 0.364                                     | 0.487                                     | 0.588                                     | 0.786                                     |
|         | 10            |           | 0.363                                     | 0.475                                     | 0.584                                     | 0.779                                     |
|         | 15            |           | 0.345                                     | 0.468                                     | 0.583                                     | 0.758                                     |
|         | 20            |           | 0.337                                     | 0.462                                     | 0.577                                     | 0.755                                     |
|         | 25            |           | 0.335                                     | 0.452                                     | 0.574                                     | 0.752                                     |
| N5      | 0             |           | 0.371                                     | 0.487                                     | 0.598                                     | 0.786                                     |
|         | 5             |           | 0.367                                     | 0.472                                     | 0.593                                     | 0.783                                     |
|         | 10            |           | 0.365                                     | 0.47                                      | 0.585                                     | 0.782                                     |
|         | 15            |           | 0.345                                     | 0.468                                     | 0.579                                     | 0.766                                     |
|         | 20            |           | 0.343                                     | 0.466                                     | 0.579                                     | 0.766                                     |
|         | 25            |           | 0.342                                     | 0.461                                     | 0.571                                     | 0.756                                     |
| N6      | 0             |           | 0.379                                     | 0.48                                      | 0.597                                     | 0.789                                     |
|         | 5             |           | 0.377                                     | 0.479                                     | 0.593                                     | 0.784                                     |
|         | 10            |           | 0.35                                      | 0.476                                     | 0.593                                     | 0.784                                     |
|         | 15            |           | 0.348                                     | 0.473                                     | 0.592                                     | 0.779                                     |
|         | 20            |           | 0.347                                     | 0.455                                     | 0.588                                     | 0.771                                     |
|         | 25            |           | 0.344                                     | 0.451                                     | 0.579                                     | 0.771                                     |
| N7      | 0             |           | 0.366                                     | 0.482                                     | 0.598                                     | 0.782                                     |
|         | 5             |           | 0.357                                     | 0.481                                     | 0.584                                     | 0.779                                     |
|         | 10            |           | 0.355                                     | 0.472                                     | 0.583                                     | 0.779                                     |
|         | 15            |           | 0.353                                     | 0.457                                     | 0.575                                     | 0.752                                     |
|         | 20            |           | 0.336                                     | 0.457                                     | 0.573                                     | 0.752                                     |
|         | 25            |           | 0.334                                     | 0.451                                     | 0.572                                     | 0.752                                     |
| N8      | 0             |           | 0.377                                     | 0.484                                     | 0.591                                     | 0.787                                     |
|         | 5             |           | 0.376                                     | 0.48                                      | 0.591                                     | 0.786                                     |
|         | 10            |           | 0.376                                     | 0.467                                     | 0.583                                     | 0.785                                     |
|         | 15            |           | 0.371                                     | 0.463                                     | 0.581                                     | 0.757                                     |
|         | 20            |           | 0.363                                     | 0.46                                      | 0.579                                     | 0.756                                     |
|         | 25            |           | 0.344                                     | 0.451                                     | 0.571                                     | 0.756                                     |
| N9      | 0             |           | 0.372                                     | 0.48                                      | 0.591                                     | 0.789                                     |
|         | 5             |           | 0.365                                     | 0.478                                     | 0.587                                     | 0.782                                     |
|         | 10            |           | 0.36                                      | 0.476                                     | 0.583                                     | 0.781                                     |
|         | 15            |           | 0.357                                     | 0.474                                     | 0.582                                     | 0.78                                      |
|         | 20            |           | 0.349                                     | 0.455                                     | 0.58                                      | 0.761                                     |
|         | 25            |           | 0.34                                      | 0.451                                     | 0.579                                     | 0.754                                     |
| N10     | 0             |           | 0.368                                     | 0.484                                     | 0.598                                     | 0.785                                     |
|         | 5             |           | 0.359                                     | 0.475                                     | 0.595                                     | 0.785                                     |
|         | 10            |           | 0.354                                     | 0.471                                     | 0.595                                     | 0.78                                      |
|         | 15            |           | 0.353                                     | 0.469                                     | 0.577                                     | 0.778                                     |
|         | 20            |           | 0.347                                     | 0.462                                     | 0.575                                     | 0.755                                     |
|         | 25            |           | 0.338                                     | 0.456                                     | 0.572                                     | 0.753                                     |
| N11     | 0             |           | 0.374                                     | 0.483                                     | 0.596                                     | 0.788                                     |
|         | 5             |           | 0.374                                     | 0.475                                     | 0.588                                     | 0.77                                      |
|         | 10            |           | 0.367                                     | 0.474                                     | 0.588                                     | 0.77                                      |
|         | 15            |           | 0.365                                     | 0.472                                     | 0.586                                     | 0.768                                     |
|         | 20            |           | 0.355                                     | 0.467                                     | 0.573                                     | 0.762                                     |
|         | 25            |           | 0.343                                     | 0.464                                     | 0.569                                     | 0.752                                     |
| N12     | 0             |           | 0.377                                     | 0.489                                     | 0.584                                     | 0.79                                      |
|         | 5             |           | 0.363                                     | 0.488                                     | 0.578                                     | 0.783                                     |
|         | 10            |           | 0.361                                     | 0.48                                      | 0.578                                     | 0.766                                     |
|         | 15            |           | 0.351                                     | 0.471                                     | 0.575                                     | 0.764                                     |
|         | 20            |           | 0.344                                     | 0.469                                     | 0.572                                     | 0.761                                     |
|         | 25            |           | 0.341                                     | 0.468                                     | 0.572                                     | 0.753                                     |

**Table 64.** F-NC scores obtained by aligning the original synthetic network with its noisy versions for all the networks. In the alignment graph building all pair of nodes were selected.

| Network | Altered Net-works | F-NC on 1 coloured version | F-NC on 2 coloured version | F-NC on 3 coloured version | F-NC on 4 coloured version |
|---------|-------------------|----------------------------|----------------------------|----------------------------|----------------------------|
| N1      | 0                 | 0.32                       | 0.45                       | 0.568                      | 0.72                       |
|         | 5                 | 0.314                      | 0.444                      | 0.531                      | 0.719                      |
|         | 10                | 0.309                      | 0.441                      | 0.529                      | 0.711                      |
|         | 15                | 0.308                      | 0.44                       | 0.507                      | 0.709                      |
|         | 20                | 0.304                      | 0.435                      | 0.506                      | 0.704                      |
|         | 25                | 0.304                      | 0.434                      | 0.501                      | 0.703                      |
| N2      | 0                 | 0.32                       | 0.454                      | 0.595                      | 0.713                      |
|         | 5                 | 0.32                       | 0.454                      | 0.592                      | 0.71                       |
|         | 10                | 0.317                      | 0.438                      | 0.591                      | 0.71                       |
|         | 15                | 0.311                      | 0.437                      | 0.59                       | 0.71                       |
|         | 20                | 0.305                      | 0.436                      | 0.566                      | 0.708                      |
|         | 25                | 0.304                      | 0.434                      | 0.522                      | 0.707                      |
| N3      | 0                 | 0.314                      | 0.452                      | 0.595                      | 0.719                      |
|         | 5                 | 0.311                      | 0.448                      | 0.592                      | 0.716                      |
|         | 10                | 0.31                       | 0.446                      | 0.572                      | 0.713                      |
|         | 15                | 0.31                       | 0.445                      | 0.544                      | 0.712                      |
|         | 20                | 0.303                      | 0.444                      | 0.537                      | 0.711                      |
|         | 25                | 0.302                      | 0.441                      | 0.533                      | 0.707                      |
| N4      | 0                 | 0.314                      | 0.45                       | 0.556                      | 0.718                      |
|         | 5                 | 0.314                      | 0.444                      | 0.553                      | 0.718                      |
|         | 10                | 0.308                      | 0.441                      | 0.535                      | 0.713                      |
|         | 15                | 0.305                      | 0.439                      | 0.523                      | 0.709                      |
|         | 20                | 0.305                      | 0.437                      | 0.505                      | 0.703                      |
|         | 25                | 0.302                      | 0.436                      | 0.504                      | 0.703                      |
| N5      | 0                 | 0.319                      | 0.448                      | 0.599                      | 0.715                      |
|         | 5                 | 0.318                      | 0.446                      | 0.58                       | 0.715                      |
|         | 10                | 0.314                      | 0.441                      | 0.574                      | 0.714                      |
|         | 15                | 0.311                      | 0.439                      | 0.571                      | 0.713                      |
|         | 20                | 0.31                       | 0.436                      | 0.569                      | 0.71                       |
|         | 25                | 0.307                      | 0.435                      | 0.523                      | 0.71                       |
| N6      | 0                 | 0.318                      | 0.448                      | 0.589                      | 0.717                      |
|         | 5                 | 0.318                      | 0.447                      | 0.589                      | 0.717                      |
|         | 10                | 0.315                      | 0.443                      | 0.588                      | 0.71                       |
|         | 15                | 0.314                      | 0.443                      | 0.558                      | 0.707                      |
|         | 20                | 0.308                      | 0.441                      | 0.53                       | 0.707                      |
|         | 25                | 0.302                      | 0.44                       | 0.522                      | 0.703                      |
| N7      | 0                 | 0.319                      | 0.454                      | 0.556                      | 0.718                      |
|         | 5                 | 0.319                      | 0.452                      | 0.555                      | 0.716                      |
|         | 10                | 0.317                      | 0.45                       | 0.506                      | 0.714                      |
|         | 15                | 0.315                      | 0.45                       | 0.506                      | 0.709                      |
|         | 20                | 0.302                      | 0.445                      | 0.505                      | 0.708                      |
|         | 25                | 0.301                      | 0.435                      | 0.501                      | 0.703                      |
| N8      | 0                 | 0.32                       | 0.449                      | 0.555                      | 0.72                       |
|         | 5                 | 0.311                      | 0.449                      | 0.545                      | 0.72                       |
|         | 10                | 0.311                      | 0.441                      | 0.544                      | 0.718                      |
|         | 15                | 0.309                      | 0.439                      | 0.536                      | 0.716                      |
|         | 20                | 0.305                      | 0.438                      | 0.514                      | 0.712                      |
|         | 25                | 0.303                      | 0.434                      | 0.501                      | 0.709                      |
| N9      | 0                 | 0.319                      | 0.451                      | 0.581                      | 0.714                      |
|         | 5                 | 0.318                      | 0.451                      | 0.565                      | 0.714                      |
|         | 10                | 0.318                      | 0.449                      | 0.565                      | 0.713                      |
|         | 15                | 0.31                       | 0.445                      | 0.563                      | 0.712                      |
|         | 20                | 0.305                      | 0.441                      | 0.557                      | 0.71                       |
|         | 25                | 0.301                      | 0.438                      | 0.555                      | 0.705                      |
| N10     | 0                 | 0.318                      | 0.452                      | 0.591                      | 0.719                      |
|         | 5                 | 0.318                      | 0.444                      | 0.557                      | 0.716                      |
|         | 10                | 0.315                      | 0.441                      | 0.546                      | 0.716                      |
|         | 15                | 0.312                      | 0.44                       | 0.538                      | 0.712                      |
|         | 20                | 0.308                      | 0.436                      | 0.532                      | 0.709                      |
|         | 25                | 0.307                      | 0.435                      | 0.505                      | 0.706                      |
| N11     | 0                 | 0.316                      | 0.449                      | 0.561                      | 0.719                      |
|         | 5                 | 0.315                      | 0.449                      | 0.559                      | 0.711                      |
|         | 10                | 0.313                      | 0.445                      | 0.544                      | 0.709                      |
|         | 15                | 0.312                      | 0.443                      | 0.54                       | 0.705                      |
|         | 20                | 0.305                      | 0.438                      | 0.535                      | 0.704                      |
|         | 25                | 0.303                      | 0.436                      | 0.524                      | 0.702                      |
| N12     | 0                 | 0.32                       | 0.447                      | 0.595                      | 0.72                       |
|         | 5                 | 0.318                      | 0.444                      | 0.578                      | 0.717                      |
|         | 10                | 0.315                      | 0.442                      | 0.56                       | 0.717                      |
|         | 15                | 0.311                      | 0.442                      | 0.552                      | 0.717                      |
|         | 20                | 0.31                       | 0.439                      | 0.518                      | 0.713                      |
|         | 25                | 0.308                      | 0.434                      | 0.514                      | 0.709                      |

**Table 65.** F-NC scores obtained by aligning the original synthetic network with its noisy versions for all the networks. In the alignment graph building all pair of nodes were selected.

| NCV-G <sup>S3</sup> | L-HetNetAligner Parameters                                                                                                                                                |
|---------------------|---------------------------------------------------------------------------------------------------------------------------------------------------------------------------|
| 0.957               | Homogeneous Match : 1<br>Heterogeneous Match: 0.9<br>Homogeneous Mismatch: 0.5<br>Heterogeneous Mismatch: 0.4<br>Homogeneous Gap: 0.2<br>Heterogeneous Gap: 0.1           |
| 0.95                | Homogeneous Match : <b>0.95</b><br>Heterogeneous Match: 0.9<br>Homogeneous Mismatch: 0.5<br>Heterogeneous Mismatch: 0.4<br>Homogeneous Gap: 0.2<br>Heterogeneous Gap: 0.1 |
| 0.947               | Homogeneous Match : 1<br>Heterogeneous Match: <b>0.8</b><br>Homogeneous Mismatch: 0.5<br>Heterogeneous Mismatch: 0.4<br>Homogeneous Gap: 0.2<br>Heterogeneous Gap: 0.1    |
| 0.951               | Homogeneous Match : 1<br>Heterogeneous Match: 0.9<br>Homogeneous Mismatch: <b>0.45</b><br>Heterogeneous Mismatch: 0.4<br>Homogeneous Gap: 0.2<br>Heterogeneous Gap: 0.1   |
| 0.951               | Homogeneous Match : 1<br>Heterogeneous Match: 0.9<br>Homogeneous Mismatch: 0.5<br>Heterogeneous Mismatch: <b>0.3</b><br>Homogeneous Gap: 0.2<br>Heterogeneous Gap: 0.1    |
| 0.954               | Homogeneous Match : 1<br>Heterogeneous Match: 0.9<br>Homogeneous Mismatch: 0.5<br>Heterogeneous Mismatch: 0.4<br>Homogeneous Gap: <b>0.15</b><br>Heterogeneous Gap: 0.1   |
| 0.952               | Homogeneous Match : 1<br>Heterogeneous Match: 0.9<br>Homogeneous Mismatch: 0.5<br>Heterogeneous Mismatch: 0.4<br>Homogeneous Gap: 0.2<br>Heterogeneous Gap: <b>0.05</b>   |

**Table 66.** F-NC scores obtained by aligning the original synthetic network with its noisy versions for all the networks. In the alignment graph building all pair of nodes were selected.

| F-NC  | L-HetNetAligner Parameters                                                                                                                                                |
|-------|---------------------------------------------------------------------------------------------------------------------------------------------------------------------------|
| 0.817 | Homogeneous Match : 1<br>Heterogeneous Match: 0.9<br>Homogeneous Mismatch: 0.5<br>Heterogeneous Mismatch: 0.4<br>Homogeneous Gap: 0.2<br>Heterogeneous Gap: 0.1           |
| 0.811 | Homogeneous Match : <b>0.95</b><br>Heterogeneous Match: 0.9<br>Homogeneous Mismatch: 0.5<br>Heterogeneous Mismatch: 0.4<br>Homogeneous Gap: 0.2<br>Heterogeneous Gap: 0.1 |
| 0.79  | Homogeneous Match : 1<br>Heterogeneous Match: <b>0.813</b><br>Homogeneous Mismatch: 0.5<br>Heterogeneous Mismatch: 0.4<br>Homogeneous Gap: 0.2<br>Heterogeneous Gap: 0.1  |
| 0.813 | Homogeneous Match : 1<br>Heterogeneous Match: 0.9<br>Homogeneous Mismatch: <b>0.45</b><br>Heterogeneous Mismatch: 0.4<br>Homogeneous Gap: 0.2<br>Heterogeneous Gap: 0.1   |
| 0.812 | Homogeneous Match : 1<br>Heterogeneous Match: 0.9<br>Homogeneous Mismatch: 0.5<br>Heterogeneous Mismatch: <b>0.3</b><br>Homogeneous Gap: 0.2<br>Heterogeneous Gap: 0.1    |
| 0.814 | Homogeneous Match : 1<br>Heterogeneous Match: 0.9<br>Homogeneous Mismatch: 0.5<br>Heterogeneous Mismatch: 0.4<br>Homogeneous Gap: <b>0.15</b><br>Heterogeneous Gap: 0.1   |
| 0.814 | Homogeneous Match : 1<br>Heterogeneous Match: 0.9<br>Homogeneous Mismatch: 0.5<br>Heterogeneous Mismatch: 0.4<br>Homogeneous Gap: 0.2<br>Heterogeneous Gap: <b>0.05</b>   |
